# Supplementary material for: Improving natural products identification through molecular features-oriented precursor ion selection and targeted MS/MS analysis: a case study of Zhi-Ke-Yang-Yin capsule
Source: Royal Society of Chemistry journal article supplement (doi:10.1039/d2ra06063a), 2022-01-01
Supplement: d2ra06063a1.pdf [file d2ra06063a1.pdf]

Improving Natural Products Identification through Molecular Features  
Orientated Precursor Ions Selection and Targeted MS/MS Analysis: A  
Case study of Zhi-Ke-Yang-Yin capsule

Hongping Wang <sup>a</sup>, Qiong Yin <sup>a</sup>, ZiJian Wang <sup>a</sup>, Ping Peng <sup>a</sup>, Chunlan Fan <sup>c</sup>, Run Zhang  
<sup>b</sup>, Chen Zhao <sup>a</sup> and Zhaozhou Lin <sup>c</sup>

<sup>a</sup> Scientific Research Institute of Beijing Tongrentang Co., Ltd., Beijing 100011,  
China

<sup>b</sup> Beijing Tongrentang Technology Development Co., Ltd., Beijing 100079, China

<sup>c</sup> Beijing Zhongyan Tongrentang Pharmaceutical R & D Co., Ltd., Beijing 100000,  
China

The first author. Tel.: +86 10 87632655; fax: +86 10 87632655.

*E-mail address:* [sungirl9626@163.com](mailto:sungirl9626@163.com)

**Supplementary Data**

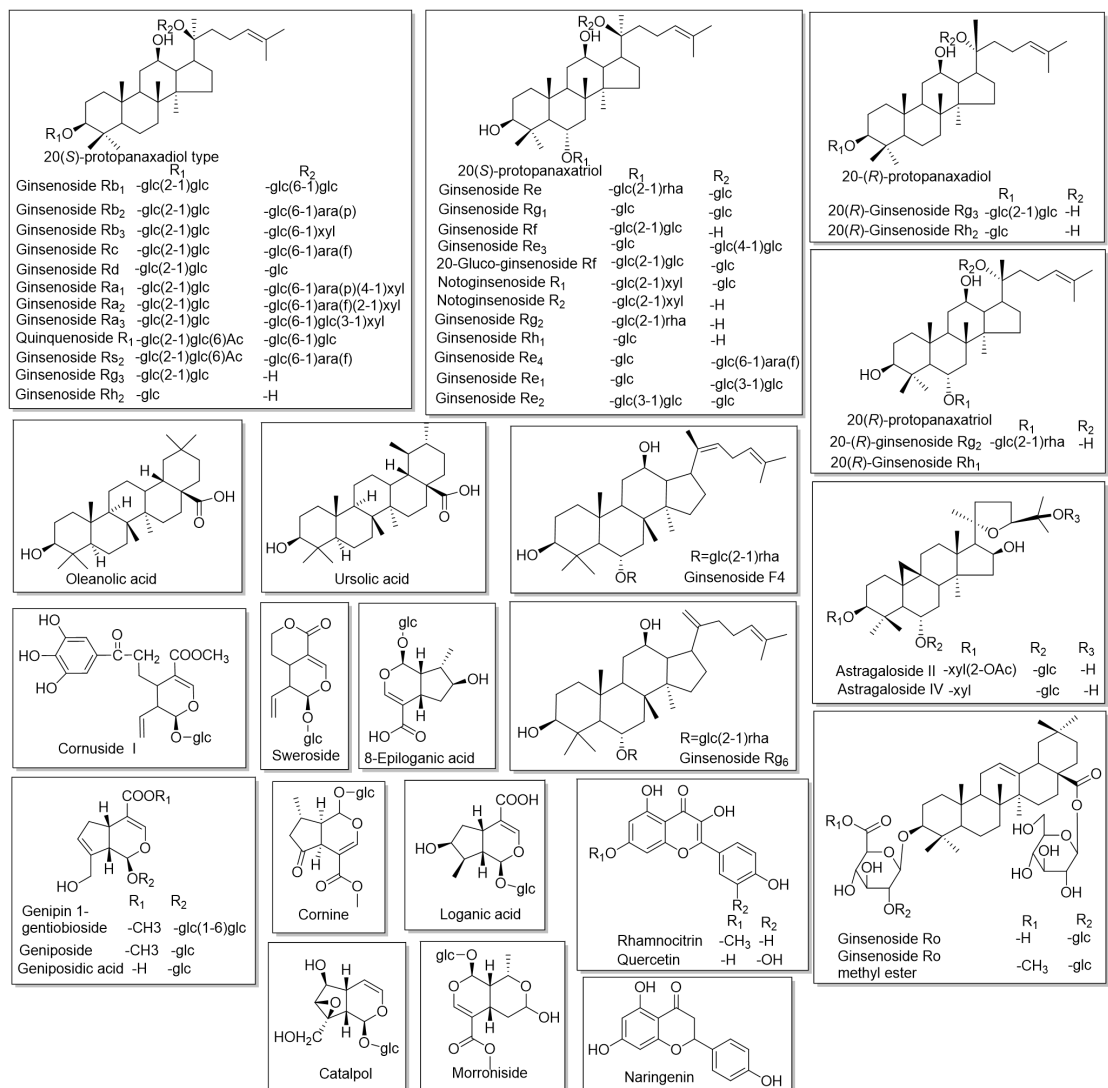

Fig. S1 The structures of the reference standards.

## **S1 Optimization of the chromatographic conditions and mass spectrometric conditions of ZKYY extract**

### **1) Optimization of the chromatographic conditions of ZKYY extract**

A Vanquish™ Flex UHPLC system (Thermo Scientific, USA), equipped with a binary pump and a thermostatted column compartment, was used to perform the separation of the multiple components.

Two types of chromatographic columns, including Waters ACQUITY UPLC® BEH C<sub>18</sub> column (2.1 x 100 mm, 1.7 μm) and Waters ACQUITY UPLC® HSS T3 column (2.1 x 100 mm, 1.8 μm), were used to perform the separation of multiple components. Good separations of multiple components were obtained on Waters ACQUITY UPLC® BEH C<sub>18</sub> column (2.1 x 100 mm, 1.7 μm) which was finally selected to analyze ZKYY extract.

The mobile phase system of methanol aqueous solution, methanol-formic acid aqueous solution, acetonitrile aqueous solution and acetonitrile-formic acid aqueous solution were investigated in our study. We found that acetonitrile-formic acid aqueous solution offers good separation of multiple components, so it was chosen as the mobile phase system.

The elution gradient was also optimized by constantly adjusting the proportion of the mobile phase A (0.1% formic acid/water, v/v) and mobile phase B (acetonitrile) and the optimized elution gradient was 0-7 min, 2-20% B; 7-10 min, 20-25% B; 10-20 min, 25-40% B; 20-25 min, 40-65% B; 25-30min, 65%B-95%B; 30-31min, 95%B-95%B.

The influence of different column temperatures (25°C, 30°C and 35°C) was also investigated. We found when the column temperature was set at 35°C, not only the lower column pressure but also better separations of multiple components were obtained. Thus, 35°C was much suitable for us.

Taking all of the aforementioned factors into account, we established the chromatographic conditions as follows: A Waters ACQUITY UPLC® BEH C<sub>18</sub> column (2.1 x 100 mm, 1.7 μm) coupled with a ACQUITY UPLC® BEH C<sub>18</sub> VanGuard™ Pre-Column (2.1 x 5 mm, 1.7 μm) was employed to perform the

chromatographic separation of ZKYY extract using mobile phase A (0.1% formic acid/water, v/v) and mobile phase B (acetonitrile) by the following gradient elution program: 0-7 min, 2-20% B; 7-10 min, 20-25% B; 10-20 min, 25-40% B; 20-25 min, 40-65% B; 25-30min, 65%B-95%B; 30-31min, 95%B-95%B. The flow rate was 0.3 mL/min and the temperature was set at 35°C. The injection volume was 2  $\mu$ L.

## **2) Optimization of the mass spectrometric conditions of ZKYY extract**

High-accuracy mass spectrometric data were recorded on Orbitrap Exploris 240 mass spectrometer (Thermo Scientific, USA) equipped with Heated ESI source.

Due to all kinds of constituents exhibited significantly stronger ion responses in negative-ion mode than in positive-ion mode, the instrument was operated in negative-ion mode.

The MS parameters were selectively optimized and the collision energy were optimized. Fixed collision energy 35V and stepped collision energy 30%, 45% and 60% (in normalized collision energy type) were compared in our study. From Fig. S2, we found when performing the above collision energy separately, there was no much difference in the MS spectra of flavonoids (B), iridoids (C), phenylethanoid glycosides (D), phenylpropanoids (E) and ionones (F). However, most saponins such as ginsenoside Rd (A) produced relatively lower abundance of  $[M-H]^-$  ion but higher abundance of fragmentation ions at collision energy 35V and exhibited relatively higher abundance of  $[M-H]^-$  ion but lower abundance of fragmentation ions at stepped collision energy 30%, 45% and 60% (in normalized collision energy type). It can be seen, probably 35V was much suitable for saponins. Thus, taking saponins, flavonoids, iridoids, phenylethanoid glycosides, phenylpropanoids and ionones into consideration, fixed 35V was finally selected as the collision energy.

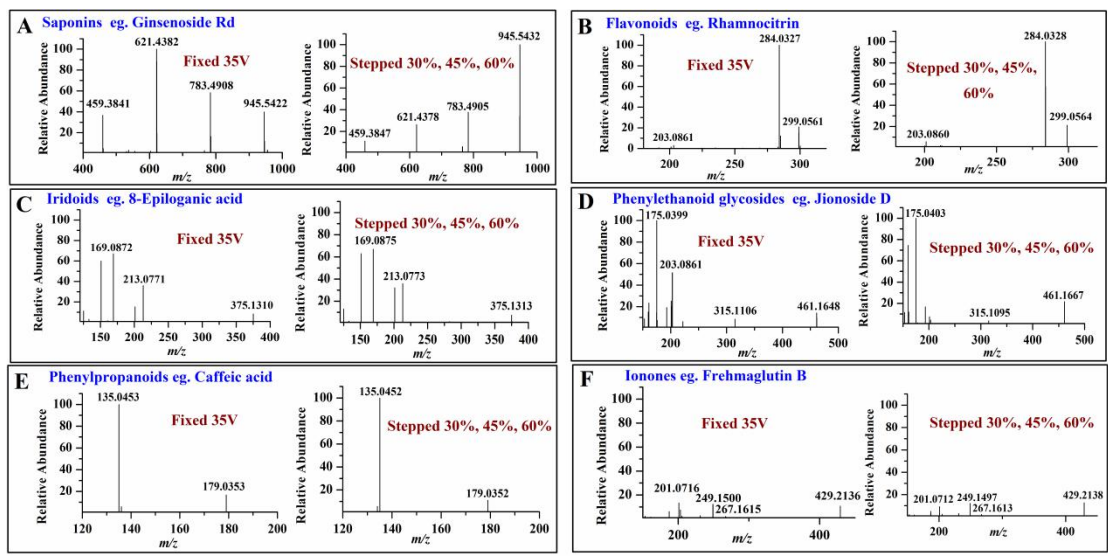

Fig. S2 The MS spectra of saponins (A), flavonoids (B), iridoids (C), phenylethanoid glycosides (D), phenylpropanoids (E) and ionones (F) in fixed collision energy 35V and stepped collision energy 30%, 45% and 60% (in normalized collision energy type).

## S2 Identification of saponins

Except for ginsenosides identified mentioned in text, other known compounds and their isomerized, acetylated and malonylated compounds were also identified. Thirty-four triterpenoids, namely, ginsenoside Re<sub>3</sub> (**R2**), ginsenoside Re<sub>4</sub> (**R3**), 20-Glc-Rf (**R5**), ginsenoside Re<sub>1</sub> (**R7**), notoginsenoside R<sub>1</sub> (**R9**), ginsenoside Re<sub>2</sub> (**R10**), ginsenoside Rg<sub>1</sub> (**R16**), ginsenoside Re (**R17**), ginsenoside Rf (**R42**), notoginsenoside R<sub>2</sub> (**R47**), ginsenoside Ra<sub>2</sub> (**R55**), ginsenoside Ra<sub>3</sub> (**R58**), ginsenoside Rb<sub>1</sub> (**R59**), 20(*S*)-ginsenoside Rg<sub>2</sub> (**R60**), 20(*S*)-ginsenoside Rh<sub>1</sub> (**R61**), 20(*R*)-ginsenoside Rg<sub>2</sub> (**R68**), ginsenoside Rc (**R70**), 20(*R*)-ginsenoside Rh<sub>1</sub> (**R71**), ginsenoside Ra<sub>1</sub> (**R72**), ginsenoside Ro (**R74**), ginsenoside Rb<sub>2</sub> (**R81**), ginsenoside Rb<sub>3</sub> (**R82**), quinquenoside R<sub>1</sub> (**R86**), ginsenoside Rs<sub>2</sub> (**R91**), ginsenoside Rd (**R92**), ginsenoside Ro methyl ester (**R113**), ginsenoside F4 (**R129**), ginsenoside Rg<sub>6</sub> (**R133**), 20(*S*)-ginsenoside Rg<sub>3</sub> (**R139**), 20(*R*)-ginsenoside Rg<sub>3</sub> (**R141**), 20(*S*)-ginsenoside Rh<sub>2</sub> (**R147**), 20(*R*)-ginsenoside Rh<sub>2</sub> (**R148**), astragaloside IV (**H13**), astragaloside II (**H18**), were confirmed and validated by comparing the mass spectra, retention times and fragmentation pathways with those of reference standards. Then, the fragmentation pathways were used to deduce the other compounds.

**R18**, **R23**, **R25** and **R29** owned the same not only precursor ion but also the same fragmentation pathways and fragmentation ions as those of ginsenoside Re, so that they were tentatively assigned as the isomers of ginsenoside Re. Similarly, the isomers of the other reference standards were characterized, and **R39** as well as **R65** were identified as ginsenoside Rb<sub>1</sub> isomer while **R53**, **R56** as well as **R62** were

characterized as ginsenoside Ro isomer. **R41**, **R46**, **R50** and **R64** were the isomers of notoginsenoside R4 or ginsenoside Ra<sub>3</sub>, and **R104**, **R112** as well as **R134** were the isomers of ginsenoside Rd. **R124** was elucidated as isomerized ginsenoside Rg<sub>2</sub> while **R88** and **R96** were elucidated as the isomerized quinquenoside R<sub>1</sub>. **R11** was the isomer of notoginsenoside R<sub>1</sub>.

Other known ginsenosides including **R4**, **R8**, **R13**, **R31**, **R32**, **R40**, **R48**, **R51**, **R80**, **R84**, **R89**, **R90**, **R99**, **R101**, **R103**, **R109**, **R116**, **R117**, **R119**, **R122**, **R125**, **R136**, **R142**, **R145** and **R146** were tentatively assigned according to their diagnostic ions and the successively losses of a series of saccharide moiety. Their isomers, which own the same precursor ions, fragmentation pathways and fragmentation ions as the above known compounds were tentatively characterized. **R1**, **R20**, **R26**, **R30** and **R34** were tentatively identified as floralginsenoside P and its isomers. All fragmentation ions were detailed in Table S1.

Except for some isomers were founded, the acetylated and malonylated of known ginsenosides were also detected. After loss of acetyl (42 Da), the remaining fragmentation ions of **R27** and **R36** were the same as those of the reference standard of ginsenoside Re, thus, **R27** and **R36** were deduced as acetyl-ginsenoside Re. Similarly, **R95** was deduced as acetyl-ginsenoside Rd, while **R135**, **R137** and **R140** were deduced as acetyl-ginsenoside Rg<sub>3</sub>. **R107** and **R111** were deduced as acetyl-pseudo-ginsenoside RC<sub>1</sub>. The remaining fragmentation ions of **R22** were the same as those of the reference standard of ginsenoside Rg<sub>1</sub> after loss of malonyl (86 Da), therefore, **R22** was characterized as malonyl-ginsenoside Rg<sub>1</sub>. **R24** was

characterized as malonyl-ginsenoside Re while **R94** was identified as malonyl-ginsenoside Rd in the same way. Also, **R28, R45, R54, R57, R66, R67, R69, R73, R75, R77, R79, R83, R85, R100, R106, R123** and **R126** were identified as the malonyl compounds of corresponding reference standards.

Except for ginsenosides, 25 stragalus saponins were also detected and most of them produced the diagnostic ion at  $m/z$  489.3580 by successively losses of a series of acetyl and saccharide moiety. The detailed fragmentation ions were shown in Table S1.

### **S3 Identification of flavonoids**

Except for identified flavonoids mentioned in text, other known compounds and their isomers were also characterized. **H84** was extracted at  $m/z$  315.0873 with a mass deviation of 1.27 ppm, indicating its molecular formula was  $C_{17}H_{16}O_6$ . In its MS/MS spectrum, the fragmentation ions at  $m/z$  285.0409 and 257.0464 suggested the successive losses of  $OCH_2$  and CO from  $[M-H]^-$  ion, respectively, while  $m/z$  241.0522 and 211.1346 indicated the successive losses of  $CO_2$  and  $OCH_2$  from  $m/z$  285.0409, respectively. Thus, **H84** was tentatively deduced as 2', 4'-Dihydroxy-5, 6-Dimethoxyflavone, a known compound isolated from *Astragalus membranaceus*. Similarly, other known compounds such as **H27-H29, H32, H34-H36, H46, H47, H57, H58, H59, H64-H66, H69, H70, H72, H76, H77, H81, H82, H87, H88, S67, S69, S74-S76, S77, S78, S80, S81, S86** and **S87** were tentatively characterized. Beyond that, the isomers of known compounds were also characterized. For instance, the extracted precursor ion of **H37, H41, H49, H53, H61, H80, H85** and **H90** was



observed at  $m/z$  285.0768, which was the same as that of **H69**, indicating their molecular formula was  $C_{16}H_{14}O_5$ . Their fragmentation ions were observed the same as those of **H69** at  $m/z$  270.0513 and 228.0424 suggesting  $CH_3$  and  $C_2H_2O$  were successively eliminated from the precursor ion. Thus, **H37**, **H41**, **H49**, **H53**, **H61**, **H80**, **H85** and **H90** were tentatively assigned as vesticarpan isomers.

Actually, the sugar moieties of the flavonoids existing in forms of glycosides were always firstly eliminated from the precursor ions in their targeted analysis and then followed by a series of neutral losses of small molecular. The precursor ion of **S80** was extracted at  $m/z$  593.1508 with a mass derivation of 0.34 ppm suggesting its molecular formula was  $C_{27}H_{30}O_{15}$ . The fragmentation ions at  $m/z$  285.0410 suggesting Gal and Rha were eliminated from the precursor ion and the ions at  $m/z$  267.0302 and 241.0510 indicating  $H_2O$  and  $CO_2$  were eliminated from  $m/z$  285.0410. Thus, **S80** was deduced as a known compound kaempferol-3-O- $\alpha$ -L-Rhamnosyl(1-6)- $\beta$ -D-galactoside. The precursor ions as well as the fragmentation ions of **S64**, **S66**, **S70**, **S72** and **S83** were the same as **S80**, thus, they were tentatively assigned as the isomers of kaempferol-3-O- $\alpha$ -L-Rhamnosyl(1-6)- $\beta$ -D-galactoside. In the same way, the other known compounds and isomers were tentatively assigned, the fragmentation ions were shown in Table S2.

Table S1 Saponins from ZKYY

| No.                                | $t_R$<br>(min) | Molecular<br>formula | Measured<br>value ( $m/z$ ) | Diff<br>(ppm) | Product ions                                      | Compound name                 |
|------------------------------------|----------------|----------------------|-----------------------------|---------------|---------------------------------------------------|-------------------------------|
| Saponins from <i>panax ginseng</i> |                |                      |                             |               |                                                   |                               |
| R1                                 | 10.12          | $C_{53}H_{90}O_{23}$ | 1093.5817                   | 2.01          | 799.4976[M-H-Ara-Glc],<br>637.4310[M-H-Ara-2Glc], | Floralginsenoside<br>P/isomer |

|     |       |                                                 |           |       |                                                                                                                                                                 |                                             |
|-----|-------|-------------------------------------------------|-----------|-------|-----------------------------------------------------------------------------------------------------------------------------------------------------------------|---------------------------------------------|
| R2  | 10.57 | C <sub>48</sub> H <sub>82</sub> O <sub>19</sub> | 961.5381  | 0.94  | 475.3813[M-H-Ara-3Glc] <sup>-</sup><br>799.4852[M-H-Glc] <sup>-</sup> ,<br>637.4333[M-H-2Glc] <sup>-</sup> ,<br>475.3802[M-H-3Glc] <sup>-</sup> ,               | Ginsenoside Re <sub>3</sub> <sup>a</sup>    |
| R3  | 10.96 | C <sub>47</sub> H <sub>80</sub> O <sub>18</sub> | 931.5259  | -0.75 | 799.4870[M-H-Ara(f)] <sup>-</sup> ,<br>637.4312[M-H-Ara(f)-Glc] <sup>-</sup> ,<br>475.3810[M-H-Ara(f)-2Glc] <sup>-</sup>                                        | Ginsenoside Re <sub>4</sub> <sup>a</sup>    |
| R4  | 11.04 | C <sub>53</sub> H <sub>90</sub> O <sub>22</sub> | 1077.5845 | 0.00  | 945.5450[M-H-Ara] <sup>-</sup> ,<br>783.4838[M-H-Ara-Glc] <sup>-</sup> ,<br>637.4318[M-H-Ara-Glc-Rha] <sup>-</sup> ,<br>475.3777[M-H-Ara-2Glc-Rha] <sup>-</sup> | Floralginsenoside<br>M/Floralginsenoside N  |
| R5  | 11.18 | C <sub>48</sub> H <sub>82</sub> O <sub>19</sub> | 961.5378  | 0.62  | 799.4838[M-H-Glc] <sup>-</sup> ,<br>637.4320[M-H-2Glc] <sup>-</sup> ,<br>475.3791[M-H-3Glc] <sup>-</sup>                                                        | 20-Gluco-ginsenoside Rf <sup>a</sup>        |
| R6  | 11.31 | C <sub>54</sub> H <sub>92</sub> O <sub>23</sub> | 1107.5961 | 0.90  | 945.5485[M-H-Glc] <sup>-</sup> ,<br>783.4889[M-H-2Glc] <sup>-</sup> ,<br>637.4330[M-H-2Glc-Rha] <sup>-</sup> ,<br>475.3810[M-H-3Glc-Rha] <sup>-</sup>           | Protopanaxatriol+3Glc+R<br>ha               |
| R7  | 11.32 | C <sub>48</sub> H <sub>82</sub> O <sub>19</sub> | 961.5381  | 0.94  | 799.4897[M-H-Glc] <sup>-</sup> ,<br>637.4309[M-H-2Glc] <sup>-</sup> ,<br>475.3794[M-H-3Glc] <sup>-</sup> ,                                                      | Ginsenoside Re <sub>1</sub> <sup>a</sup>    |
| R8  | 11.39 | C <sub>53</sub> H <sub>90</sub> O <sub>22</sub> | 1077.5846 | 0.09  | 945.5465[M-H-Ara] <sup>-</sup> ,<br>799.4873[M-H-Ara-Rha] <sup>-</sup> ,<br>637.4344[M-H-Ara-Rha-Glc] <sup>-</sup> ,<br>475.3777[M-H-Ara-Rha-2Glc] <sup>-</sup> | Floralginsenoside<br>M/Floralginsenoside N  |
| R9  | 11.49 | C <sub>47</sub> H <sub>80</sub> O <sub>18</sub> | 931.5272  | 0.64  | 799.4841[M-H-Xyl] <sup>-</sup> ,<br>637.4319[M-H-Xyl-Glc] <sup>-</sup> ,<br>475.795[M-H-Xyl-2Glc] <sup>-</sup>                                                  | Notoginsenoside R <sub>1</sub> <sup>a</sup> |
| R10 | 11.60 | C <sub>48</sub> H <sub>82</sub> O <sub>19</sub> | 961.5377  | 0.52  | 799.4895[M-H-Glc] <sup>-</sup> ,<br>637.4328[M-H-2Glc] <sup>-</sup> ,<br>475.3805[M-H-3Glc] <sup>-</sup>                                                        | Ginsenoside Re <sub>2</sub> <sup>a</sup>    |
| R11 | 11.81 | C <sub>47</sub> H <sub>80</sub> O <sub>18</sub> | 931.5276  | 1.07  | 799.4841[M-H-Xyl] <sup>-</sup> ,<br>637.4303[M-H-Xyl-Glc] <sup>-</sup> ,<br>475.3780[M-H-Xyl-2Glc] <sup>-</sup>                                                 | Notoginsenoside R <sub>1</sub><br>isomer    |
| R12 | 11.89 | C <sub>54</sub> H <sub>92</sub> O <sub>23</sub> | 1107.5970 | 1.72  | 945.5467[M-H-Glc] <sup>-</sup> ,<br>783.4889[M-H-2Glc] <sup>-</sup> ,<br>637.430[M-H-2Glc-Rha] <sup>-</sup> ,<br>475.3810[M-H-3Glc-Rha] <sup>-</sup>            | Protopanaxatriol+3Glc+R<br>ha               |
| R13 | 12.01 | C <sub>54</sub> H <sub>92</sub> O <sub>24</sub> | 1123.5905 | 0.45  | 961.5388[M-H-Glc] <sup>-</sup> ,<br>799.4835[M-H-2Glc] <sup>-</sup> ,<br>637.4330[M-H-3Glc] <sup>-</sup> ,<br>475.3788[M-H-4Glc] <sup>-</sup>                   | Koryoginsenoside R <sub>2</sub>             |
| R14 | 12.08 | C <sub>54</sub> H <sub>92</sub> O <sub>23</sub> | 1107.5941 | -0.90 | 945.5471[M-H-Glc] <sup>-</sup> ,<br>783.4981[M-H-2Glc] <sup>-</sup> ,                                                                                           | Protopanaxatriol+3Glc+R<br>ha               |

|     |       |                                                 |           |       |                                                                                                                                                                                          |                                                             |
|-----|-------|-------------------------------------------------|-----------|-------|------------------------------------------------------------------------------------------------------------------------------------------------------------------------------------------|-------------------------------------------------------------|
| R15 | 12.09 | C <sub>48</sub> H <sub>82</sub> O <sub>19</sub> | 961.5362  | -1.04 | 637.4370[M-H-2Glc-Rha] <sup>-</sup> ,<br>475.3776[M-H-3Glc-Rha] <sup>-</sup><br>799.4890[M-H-Glc] <sup>-</sup> ,<br>637.4329[M-H-2Glc] <sup>-</sup> ,<br>475.3800[M-H-3Glc] <sup>-</sup> | Notoginsenoside N<br>isomer                                 |
| R16 | 12.16 | C <sub>42</sub> H <sub>72</sub> O <sub>14</sub> | 799.4849  | 0.63  | 637.4355[M-H-Glc] <sup>-</sup> ,<br>475.3808[M-H-2Glc] <sup>-</sup>                                                                                                                      | Ginsenoside Rg <sub>1</sub> <sup>a</sup>                    |
| R17 | 12.20 | C <sub>48</sub> H <sub>82</sub> O <sub>18</sub> | 945.5431  | 0.85  | 783.4901[M-H-Glc] <sup>-</sup> ,<br>637.4330[M-H-Glc-Rha] <sup>-</sup> ,<br>475.3795[M-H-2Glc-Rha] <sup>-</sup>                                                                          | Ginsenoside Re <sup>a</sup>                                 |
| R18 | 12.38 | C <sub>48</sub> H <sub>82</sub> O <sub>18</sub> | 945.5433  | 1.06  | 783.4897[M-H-Glc] <sup>-</sup> ,<br>637.4321[M-H-Glc-Rha] <sup>-</sup> ,<br>475.3792[M-H-2Glc-Rha] <sup>-</sup>                                                                          | Re isomer                                                   |
| R19 | 12.55 | C <sub>53</sub> H <sub>90</sub> O <sub>22</sub> | 1077.5848 | 0.28  | 945.5455[M-H-Ara] <sup>-</sup> ,<br>799.4869[M-H-Ara-Rha] <sup>-</sup> ,<br>637.4371[M-H-Ara-Rha-Glc] <sup>-</sup> ,<br>475.3776[M-H-Ara-Rha-2Glc] <sup>-</sup>                          | Floralginsenoside M<br>isomer/Floralginsenoside<br>N isomer |
| R20 | 12.58 | C <sub>53</sub> H <sub>90</sub> O <sub>23</sub> | 1093.5812 | 1.55  | 799.4867[M-H-Ara-Glc] <sup>-</sup> ,<br>637.4344[M-H-Ara-2Glc] <sup>-</sup> ,<br>475.3759[M-H-Ara-3Glc] <sup>-</sup>                                                                     | Floralginsenoside<br>P/isomer                               |
| R21 | 12.90 | C <sub>48</sub> H <sub>82</sub> O <sub>19</sub> | 961.5363  | -0.94 | 799.3902[M-H-Glc] <sup>-</sup> ,<br>637.3571[M-H-2Glc] <sup>-</sup> ,<br>475.3743[M-H-3Glc] <sup>-</sup>                                                                                 | Notoginsenoside N<br>isomer                                 |
| R22 | 12.90 | C <sub>45</sub> H <sub>74</sub> O <sub>17</sub> | 885.4840  | -0.90 | 637.4316[M-H-Malonyl-Glc] <sup>-</sup> ,<br>475.3779[M-H-Malonyl-2Glc] <sup>-</sup>                                                                                                      | Malonyl-ginsenoside Rg <sub>1</sub>                         |
| R23 | 13.08 | C <sub>48</sub> H <sub>82</sub> O <sub>18</sub> | 945.5412  | -1.16 | 783.4919[M-H-Glc] <sup>-</sup> ,<br>637.4326[M-H-Glc-Rha] <sup>-</sup> ,<br>475.3794[M-H-2Glc-Rha] <sup>-</sup>                                                                          | Ginsenoside Re isomer                                       |
| R24 | 13.43 | C <sub>51</sub> H <sub>84</sub> O <sub>21</sub> | 1031.5428 | 0.10  | 945.5392[M-H-Malonyl] <sup>-</sup> ,<br>783.4880[M-H-Malonyl-Glc] <sup>-</sup> ,<br>637.4326[M-H-Malonyl-Glc-Rha] <sup>-</sup> ,<br>475.3799[M-H-Malonyl-2Glc-Rha] <sup>-</sup>          | Malonyl-ginsenoside Re                                      |
| R25 | 13.44 | C <sub>48</sub> H <sub>82</sub> O <sub>18</sub> | 945.5433  | 1.06  | 783.4930[M-H-Glc] <sup>-</sup> ,<br>637.4330[M-H-Glc-Rha] <sup>-</sup> ,<br>475.3818[M-H-2Glc-Rha] <sup>-</sup>                                                                          | Ginsenoside Re isomer                                       |
| R26 | 13.52 | C <sub>53</sub> H <sub>90</sub> O <sub>23</sub> | 1093.5802 | 0.64  | 799.4709[M-H-Ara-Glc] <sup>-</sup> ,<br>637.4294[M-H-Ara-2Glc] <sup>-</sup> ,<br>475.3743[M-H-Ara-3Glc] <sup>-</sup>                                                                     | Floralginsenoside<br>P/isomer                               |
| R27 | 13.54 | C <sub>50</sub> H <sub>84</sub> O <sub>19</sub> | 987.5520  | -0.91 | 945.5434[M-H-Ac] <sup>-</sup> ,<br>783.4855[M-H-Ac-Glc] <sup>-</sup> ,<br>637.4315[M-H-Ac-Glc-Rha] <sup>-</sup> ,<br>475.3791[M-H-Ac-2Glc-Rha] <sup>-</sup>                              | Acetyl-ginsenoside Re                                       |
| R28 | 13.64 | C <sub>45</sub> H <sub>74</sub> O <sub>17</sub> | 885.4843  | -0.56 | 637.4310[M-H-Malonyl-Glc] <sup>-</sup> ,<br>475.3799[M-H-Malonyl-2Glc] <sup>-</sup>                                                                                                      | Malonyl-ginsenoside Rf                                      |

|     |       |                                                  |           |       |                                                                                                                                                                                     |                                                                                |
|-----|-------|--------------------------------------------------|-----------|-------|-------------------------------------------------------------------------------------------------------------------------------------------------------------------------------------|--------------------------------------------------------------------------------|
| R29 | 13.88 | C <sub>48</sub> H <sub>82</sub> O <sub>18</sub>  | 945.5437  | 1.48  | 783.4935[M-H-Glc] <sup>-</sup> ,<br>637.4331[M-H-Glc-Rha] <sup>-</sup> ,<br>475.3801[M-H-2Glc-Rha] <sup>-</sup>                                                                     | Ginsenoside Re isomer                                                          |
| R30 | 14.11 | C <sub>53</sub> H <sub>90</sub> O <sub>23</sub>  | 1093.5811 | 1.46  | 799.4862[M-H-Ara-Glc] <sup>-</sup> ,<br>637.4322[M-H-Ara-2Glc] <sup>-</sup> ,<br>475.3789[M-H-Ara-3Glc] <sup>-</sup>                                                                | Floralginsenoside<br>P/isomer                                                  |
| R31 | 14.12 | C <sub>48</sub> H <sub>82</sub> O <sub>19</sub>  | 961.5377  | 0.52  | 799.4824[M-H-Glc] <sup>-</sup> ,<br>637.4315[M-H-2Glc] <sup>-</sup> ,<br>475.3791[M-H-3Glc] <sup>-</sup>                                                                            | Notoginsenoside N                                                              |
| R32 | 14.34 | C <sub>48</sub> H <sub>82</sub> O <sub>19</sub>  | 961.5372  | 0.00  | 799.4862[M-H-Glc] <sup>-</sup> ,<br>637.4277[M-H-2Glc] <sup>-</sup> ,<br>475.3796[M-H-3Glc] <sup>-</sup>                                                                            | Vina-ginsenoside R <sub>4</sub>                                                |
| R33 | 14.40 | C <sub>54</sub> H <sub>92</sub> O <sub>24</sub>  | 1123.5907 | 0.62  | 961.5371[M-H-Glc] <sup>-</sup> ,<br>799.4849 [M-H-2Glc] <sup>-</sup> ,<br>637.4293[M-H-3Glc] <sup>-</sup> ,<br>475.3767[M-H-4Glc] <sup>-</sup>                                      | Koryoginsenoside R <sub>2</sub><br>isomer                                      |
| R34 | 14.47 | C <sub>53</sub> H <sub>90</sub> O <sub>23</sub>  | 1093.5814 | 1.74  | 799.4885[M-H-Ara-Glc] <sup>-</sup> ,<br>127637.4363[M-H-Ara-2Glc] <sup>-</sup> ,<br>475.3785[M-H-Ara-3Glc] <sup>-</sup>                                                             | Floralginsenoside<br>P/isomer                                                  |
| R35 | 15.46 | C <sub>48</sub> H <sub>82</sub> O <sub>19</sub>  | 961.5384  | 1.25  | 799.4858[M-H-Glc] <sup>-</sup> ,<br>637.4312[M-H-2Glc] <sup>-</sup> ,<br>475.3802[M-H-3Glc] <sup>-</sup>                                                                            | Vina-ginsenoside R <sub>4</sub><br>isomer                                      |
| R36 | 15.53 | C <sub>50</sub> H <sub>84</sub> O <sub>19</sub>  | 987.5526  | -0.30 | 945.5323[M-H-Ac] <sup>-</sup> ,<br>783.4905[M-H-Ac-Glc] <sup>-</sup> ,<br>637.4360[M-H-Ac-Glc-Rha] <sup>-</sup> ,<br>475.3814[M-H-Ac-2Glc-Rha] <sup>-</sup>                         | Acetyl-ginsenoside Re                                                          |
| R37 | 15.89 | C <sub>60</sub> H <sub>102</sub> O <sub>28</sub> | 1269.6488 | 0.71  | 1107.5858[M-H-Glc] <sup>-</sup> ,<br>945.5471[M-H-2Glc] <sup>-</sup> ,<br>783.4899[M-H-3Glc] <sup>-</sup> ,<br>621.4368[M-H-4Glc] <sup>-</sup> ,<br>459.3851[M-H-5Glc] <sup>-</sup> | Protopanaxadiol+5Glc                                                           |
| R38 | 16.19 | C <sub>48</sub> H <sub>82</sub> O <sub>19</sub>  | 961.5389  | 1.77  | 799.4788[M-H-Glc] <sup>-</sup> ,<br>637.4316[M-H-2Glc] <sup>-</sup> ,<br>475.3803[M-H-3Glc] <sup>-</sup>                                                                            | Vina-ginsenoside R <sub>4</sub><br>isomer                                      |
| R39 | 16.25 | C <sub>54</sub> H <sub>92</sub> O <sub>23</sub>  | 1107.5951 | 0.00  | 945.5400[M-H-Glc] <sup>-</sup> ,<br>783.4893[M-H-2Glc] <sup>-</sup> ,<br>621.4345[M-H-3Glc] <sup>-</sup> ,<br>459.3834[M-H-4Glc] <sup>-</sup>                                       | Ginsenoside Rb <sub>1</sub> isomer                                             |
| R40 | 16.26 | C <sub>42</sub> H <sub>72</sub> O <sub>14</sub>  | 799.4854  | 1.25  | 637.4312[M-H-Glc] <sup>-</sup> ,<br>475.3799[M-H-2Glc] <sup>-</sup>                                                                                                                 | Ginsenoside Ia                                                                 |
| R41 | 16.36 | C <sub>59</sub> H <sub>100</sub> O <sub>27</sub> | 1239.6377 | 0.24  | 1107.5924[M-H-Glc] <sup>-</sup> ,<br>945.5419[M-H-Glc-Xyl] <sup>-</sup> ,<br>783.4904 [M-H-2Glc-Xyl] <sup>-</sup> ,<br>621.4343[M-H-3Glc-Xyl] <sup>-</sup>                          | Notoginsenoside R <sub>4</sub><br>isomer/Ginsenoside Ra <sub>3</sub><br>isomer |

|     |       |                                                  |           |       |                                                                                                                                                                                                                                                                                     |                                                                                |
|-----|-------|--------------------------------------------------|-----------|-------|-------------------------------------------------------------------------------------------------------------------------------------------------------------------------------------------------------------------------------------------------------------------------------------|--------------------------------------------------------------------------------|
| R42 | 16.51 | C <sub>42</sub> H <sub>72</sub> O <sub>14</sub>  | 799.4849  | 0.63  | 459.3808[M-H-4Glc-Xyl] <sup>-</sup> ,<br>637.4326[M-H-Glc] <sup>-</sup> ,<br>475.3797[M-H-2Glc] <sup>-</sup>                                                                                                                                                                        | Ginsenoside Rf <sup>a</sup>                                                    |
| R43 | 16.55 | C <sub>59</sub> H <sub>100</sub> O <sub>27</sub> | 1239.6381 | 0.56  | 1107.5955[M-H-Glc] <sup>-</sup> ,<br>945.5423[M-H-Glc-Xyl] <sup>-</sup> ,<br>783.4895[M-H-2Glc-Xyl] <sup>-</sup> ,<br>621.4370[M-H-3Glc-Xyl] <sup>-</sup> ,<br>459.3840[M-H-4Glc-Xyl] <sup>-</sup>                                                                                  | Notoginsenoside R <sub>4</sub>                                                 |
| R44 | 16.76 | C <sub>48</sub> H <sub>82</sub> O <sub>19</sub>  | 961.5388  | 1.66  | 799.4815[M-H-Glc] <sup>-</sup> ,<br>637.4232[M-H-2Glc] <sup>-</sup> ,<br>475.3837[M-H-3Glc] <sup>-</sup>                                                                                                                                                                            | Vina-ginsenoside R <sub>4</sub><br>isomer                                      |
| R45 | 16.88 | C <sub>62</sub> H <sub>102</sub> O <sub>30</sub> | 1325.6359 | -1.43 | 1239.6378[M-H-Malonyl] <sup>-</sup> ,<br>1107.5916[M-H-Malonyl-Xyl] <sup>-</sup> ,<br>945.5457[M-H-Malonyl-Xyl-Glc] <sup>-</sup> ,<br>783.4895[M-H-Malonyl-Xyl-2Glc] <sup>-</sup> ,<br>621.4343[M-H-Malonyl-Xyl-3Glc] <sup>-</sup> ,<br>459.3822[M-H-Malonyl-Xyl-4Glc] <sup>-</sup> | Malonyl-notoginsenoside<br>R <sub>4</sub>                                      |
| R46 | 16.98 | C <sub>59</sub> H <sub>100</sub> O <sub>27</sub> | 1239.6383 | 0.73  | 1107.5941[M-H-Glc] <sup>-</sup> ,<br>945.5395[M-H-Glc-Xyl] <sup>-</sup> ,<br>783.4912[M-H-2Glc-Xyl] <sup>-</sup> ,<br>621.4358[M-H-3Glc-Xyl] <sup>-</sup> ,<br>459.3817[M-H-4Glc-Xyl] <sup>-</sup>                                                                                  | Notoginsenoside R <sub>4</sub><br>isomer/Ginsenoside R <sub>a3</sub><br>isomer |
| R47 | 17.17 | C <sub>41</sub> H <sub>70</sub> O <sub>13</sub>  | 769.4743  | 0.65  | 637.4322[M-H-Xyl] <sup>-</sup> ,<br>475.3795[M-H-Xyl-Glc] <sup>-</sup>                                                                                                                                                                                                              | Notoginsenoside R <sub>2</sub> <sup>a</sup>                                    |
| R48 | 17.23 | C <sub>44</sub> H <sub>74</sub> O <sub>15</sub>  | 841.4943  | -0.71 | 799.4834[M-H-Ac] <sup>-</sup> ,<br>637.4298[M-H-Ac-Glc] <sup>-</sup> ,<br>475.3789[M-H-Ac-2Glc] <sup>-</sup>                                                                                                                                                                        | Yesaninoside D                                                                 |
| R49 | 17.42 | C <sub>58</sub> H <sub>98</sub> O <sub>26</sub>  | 1209.6273 | 0.41  | 1077.5818[M-H-Xyl] <sup>-</sup> ,<br>945.5433[M-H-Xyl-Ara] <sup>-</sup> ,<br>783.4882[M-H-Xyl-Ara-Glc] <sup>-</sup> ,<br>621.4371[M-H-X2yl-Ara-2Glc] <sup>-</sup> ,<br>459.3804[M-H-Xyl-Ara-3Glc] <sup>-</sup>                                                                      | Ginsenoside R <sub>a1</sub><br>isomer/Ginsenoside R <sub>a2</sub><br>isomer    |
| R50 | 17.49 | C <sub>59</sub> H <sub>100</sub> O <sub>27</sub> | 1239.6375 | 0.08  | 1107.5958[M-H-Glc] <sup>-</sup> ,<br>945.5432[M-H-Glc-Xyl] <sup>-</sup> ,<br>783.4883[M-H-2Glc-Xyl] <sup>-</sup> ,<br>621.4380[M-H-3Glc-Xyl] <sup>-</sup> ,<br>459.3831[M-H-4Glc-Xyl] <sup>-</sup>                                                                                  | Notoginsenoside R <sub>4</sub><br>isomer/Ginsenoside R <sub>a3</sub><br>isomer |
| R51 | 17.49 | C <sub>41</sub> H <sub>70</sub> O <sub>13</sub>  | 769.4744  | 0.78  | 637.4319[M-H-Ara] <sup>-</sup> ,<br>475.3796[M-H-Ara-Glc] <sup>-</sup>                                                                                                                                                                                                              | Ginsenoside<br>F <sub>3</sub> /Ginsenoside F <sub>5</sub>                      |
| R52 | 17.52 | C <sub>44</sub> H <sub>74</sub> O <sub>15</sub>  | 841.4954  | 0.59  | 799.4853[M-H-Ac] <sup>-</sup> ,<br>637.4254[M-H-Ac-Glc] <sup>-</sup> ,<br>475.3789[M-H-Ac-2Glc] <sup>-</sup>                                                                                                                                                                        | Yesaninoside D isomer                                                          |
| R53 | 17.52 | C <sub>48</sub> H <sub>76</sub> O <sub>19</sub>  | 955.4902  | -0.10 | 793.4329[M-H-Glc] <sup>-</sup> ,<br>731.4350[M-H-Glc-CO <sub>2</sub> -H <sub>2</sub> O] <sup>-</sup>                                                                                                                                                                                | Ginsenoside R <sub>o</sub> isomer                                              |

|     |       |                                                  |           |       |                                                                                                                                                                                                                                                                                                                                                            |                                                                                                   |
|-----|-------|--------------------------------------------------|-----------|-------|------------------------------------------------------------------------------------------------------------------------------------------------------------------------------------------------------------------------------------------------------------------------------------------------------------------------------------------------------------|---------------------------------------------------------------------------------------------------|
| R54 | 17.62 | C <sub>62</sub> H <sub>102</sub> O <sub>30</sub> | 1325.6356 | -1.66 | 569.3911[M-H-2Glc-H <sub>2</sub> O-CO <sub>2</sub> ] <sup>-</sup> ,<br>1239.6321[M-H-Malonyl] <sup>-</sup> ,<br>1107.5948[M-H-Malonyl-Xyl] <sup>-</sup> ,<br>945.5408[M-H-Malonyl-Xyl-Glc] <sup>-</sup> ,<br>783.4899[M-H-Malonyl-Xyl-2Glc] <sup>-</sup> ,<br>621.4373[M-H-Malonyl-Xyl-3Glc] <sup>-</sup> ,<br>459.3832[M-H-Malonyl-Xyl-4Glc] <sup>-</sup> | Malonyl-notoginsenoside<br>R <sub>4</sub><br>isomer/Malonyl-ginsenoside<br>Ra <sub>3</sub> isomer |
| R55 | 17.69 | C <sub>58</sub> H <sub>98</sub> O <sub>26</sub>  | 1209.6262 | -0.50 | 1077.5858[M-H-Xyl] <sup>-</sup> ,<br>945.5461[M-H-Xyl-Ara(f)] <sup>-</sup> ,<br>783.4919[M-H-Xyl-Ara(f)-Glc] <sup>-</sup> ,<br>621.4398[M-H-Xyl-Ara(f)-2Glc] <sup>-</sup> ,<br>459.3864[M-H-Xyl-Ara(f)-3Glc] <sup>-</sup>                                                                                                                                  | Ginsenoside Ra <sub>2</sub> <sup>a</sup>                                                          |
| R56 | 17.77 | C <sub>48</sub> H <sub>76</sub> O <sub>19</sub>  | 955.4907  | 0.42  | 793.4390[M-H-Glc] <sup>-</sup> ,<br>613.3750[M-H-2Glc-H <sub>2</sub> O] <sup>-</sup> ,<br>455.3515[M-H-2Glc-Glu A] <sup>-</sup>                                                                                                                                                                                                                            | Ginsenoside Ro isomer                                                                             |
| R57 | 17.84 | C <sub>62</sub> H <sub>102</sub> O <sub>30</sub> | 1325.6376 | -0.15 | 1239.6368[M-H-Malonyl] <sup>-</sup> ,<br>1107.6024[M-H-Malonyl-Xyl] <sup>-</sup> ,<br>945.5449[M-H-Malonyl-Xyl-Glc] <sup>-</sup> ,<br>783.4921[M-H-Malonyl-Xyl-2Glc] <sup>-</sup> ,<br>621.4388[M-H-Malonyl-Xyl-3Glc] <sup>-</sup> ,<br>459.3872[M-H-Malonyl-Xyl-4Glc] <sup>-</sup>                                                                        | Malonyl-notoginsenoside<br>R <sub>4</sub><br>isomer/Malonyl-ginsenoside<br>Ra <sub>3</sub> isomer |
| R58 | 17.86 | C <sub>59</sub> H <sub>100</sub> O <sub>27</sub> | 1239.6375 | 0.08  | 1107.5958[M-H-Glc] <sup>-</sup> ,<br>945.5416[M-H-Glc-Xyl] <sup>-</sup> ,<br>783.4886[M-H-2Glc-Xyl] <sup>-</sup> ,<br>621.4367[M-H-3Glc-Xyl] <sup>-</sup> ,<br>459.3842[M-H-4Glc-Xyl] <sup>-</sup>                                                                                                                                                         | Ginsenoside Ra <sub>3</sub> <sup>a</sup>                                                          |
| R59 | 17.90 | C <sub>54</sub> H <sub>92</sub> O <sub>23</sub>  | 1107.5958 | 0.63  | 945.5414[M-H-Glc] <sup>-</sup> ,<br>783.4903[M-H-2Glc] <sup>-</sup> ,<br>621.4366[M-H-3Glc] <sup>-</sup> ,<br>459.3860[M-H-4Glc] <sup>-</sup>                                                                                                                                                                                                              | Ginsenoside Rb <sub>1</sub> <sup>a</sup>                                                          |
| R60 | 17.96 | C <sub>42</sub> H <sub>72</sub> O <sub>13</sub>  | 783.4893  | -0.26 | 637.4333[M-H-Rha] <sup>-</sup> ,<br>475.3715[M-H-Rha-Glc] <sup>-</sup>                                                                                                                                                                                                                                                                                     | Ginsenoside 20(S)-Rg <sub>2</sub> <sup>a</sup>                                                    |
| R61 | 17.98 | C <sub>36</sub> H <sub>62</sub> O <sub>9</sub>   | 637.4317  | 0.16  | 475.3786[M-H-Glc] <sup>-</sup>                                                                                                                                                                                                                                                                                                                             | Ginsenoside 20(S)-Rh <sub>1</sub> <sup>a</sup>                                                    |
| R62 | 17.99 | C <sub>48</sub> H <sub>76</sub> O <sub>19</sub>  | 955.4897  | -0.63 | 793.4382[M-H-Glc] <sup>-</sup> ,<br>613.3737[M-H-2Glc-H <sub>2</sub> O] <sup>-</sup> ,<br>455.3526[M-H-2Glc-Glu A] <sup>-</sup>                                                                                                                                                                                                                            | Ginsenoside Ro isomer                                                                             |
| R63 | 18.04 | C <sub>58</sub> H <sub>98</sub> O <sub>26</sub>  | 1209.6265 | -0.25 | 1077.5839[M-H-Xyl] <sup>-</sup> ,<br>945.5435[M-H-Xyl-Ara] <sup>-</sup> ,<br>783.4897[M-H-Xyl-Ara-Glc] <sup>-</sup> ,<br>621.4370[M-H-Xyl-Ara-2Glc] <sup>-</sup> ,<br>459.3864[M-H-Xyl-Ara-3Glc] <sup>-</sup>                                                                                                                                              | Ginsenoside Ra <sub>1</sub><br>isomer/Ginsenoside Ra <sub>2</sub><br>isomer                       |
| R64 | 18.08 | C <sub>59</sub> H <sub>100</sub> O <sub>27</sub> | 1239.6389 | 1.21  | 1107.5950[M-H-Glc] <sup>-</sup> ,<br>945.5428[M-H-Glc-Xyl] <sup>-</sup> ,<br>783.4910[M-H-2Glc-Xyl] <sup>-</sup>                                                                                                                                                                                                                                           | Notoginsenoside R <sub>4</sub><br>isomer/Ginsenoside Ra <sub>3</sub><br>isomer                    |

|     |       |                                                  |           |       |                                                                                                                                                                                                                                                                                      |                                                                                          |
|-----|-------|--------------------------------------------------|-----------|-------|--------------------------------------------------------------------------------------------------------------------------------------------------------------------------------------------------------------------------------------------------------------------------------------|------------------------------------------------------------------------------------------|
|     |       |                                                  |           |       | 621.4371[M-H-3Glc-Xyl] <sup>-</sup> ,<br>459.3814[M-H-4Glc-Xyl] <sup>-</sup>                                                                                                                                                                                                         | Ginsenoside Ra <sub>3</sub> isomer                                                       |
| R65 | 18.13 | C <sub>54</sub> H <sub>92</sub> O <sub>23</sub>  | 1107.5953 | 0.18  | 945.5416[M-H-Glc] <sup>-</sup> ,<br>783.4929[M-H-2Glc] <sup>-</sup> ,<br>621.4357[M-H-3Glc] <sup>-</sup> ,<br>459.3875[M-H-4Glc] <sup>-</sup>                                                                                                                                        | Ginsenoside Rb <sub>1</sub> isomer                                                       |
| R66 | 18.18 | C <sub>62</sub> H <sub>102</sub> O <sub>30</sub> | 1325.6371 | -0.53 | 1239.6327[M-H-Malonyl] <sup>-</sup> ,<br>1107.5933[M-H-Malonyl-Xyl] <sup>-</sup> ,<br>945.5469[M-H-Malonyl-Xyl-Glc] <sup>-</sup> ,<br>783.4915[M-H-Malonyl-Xyl-2Glc] <sup>-</sup> ,<br>621.4376[M-H-Malonyl-Xyl-3Glc] <sup>-</sup> ,<br>459.3820[M-H-Malonyl-Xyl-4Glc] <sup>-</sup>  | Malonyl-ginsenoside Ra <sub>3</sub>                                                      |
| R67 | 18.25 | C <sub>57</sub> H <sub>94</sub> O <sub>26</sub>  | 1193.5942 | -1.09 | 1107.5786[M-H-Malonyl] <sup>-</sup> ,<br>945.5470[M-H-Malonyl-Glc] <sup>-</sup> ,<br>783.4943[M-H-Malonyl-2Glc] <sup>-</sup> ,<br>621.4411[M-H-Malonyl-3Glc] <sup>-</sup> ,<br>459.3854[M-H-Malonyl-4Glc] <sup>-</sup>                                                               | Malonyl-ginsenoside Rb <sub>1</sub>                                                      |
| R68 | 18.29 | C <sub>42</sub> H <sub>72</sub> O <sub>13</sub>  | 783.4895  | 0.00  | 637.4319[M-H-Rha] <sup>-</sup> ,<br>475.3794[M-H-Rha-Glc] <sup>-</sup>                                                                                                                                                                                                               | Ginsenoside 20(R)-Rg <sub>2</sub> <sup>a</sup>                                           |
| R69 | 18.38 | C <sub>62</sub> H <sub>102</sub> O <sub>30</sub> | 1325.6383 | 0.38  | 1239.6388[M-H-Malonyl] <sup>-</sup> ,<br>1107.59573[M-H-Malonyl-Xyl] <sup>-</sup> ,<br>945.5438[M-H-Malonyl-Xyl-Glc] <sup>-</sup> ,<br>783.4890[M-H-Malonyl-Xyl-2Glc] <sup>-</sup> ,<br>621.4385[M-H-Malonyl-Xyl-3Glc] <sup>-</sup> ,<br>459.3852[M-H-Malonyl-Xyl-4Glc] <sup>-</sup> | Malonyl-notoginsenoside R <sub>4</sub> isomer/Malonyl-ginsenoside Ra <sub>3</sub> isomer |
| R70 | 18.46 | C <sub>53</sub> H <sub>90</sub> O <sub>22</sub>  | 1077.5848 | 0.28  | 945.5436[M-H-Ara(f)] <sup>-</sup> ,<br>783.4905[M-H-Ara(f)-Glc] <sup>-</sup> ,<br>621.4355[M-H-Ara(f)-2Glc] <sup>-</sup> ,<br>459.3866[M-H-Ara(f)-3Glc] <sup>-</sup>                                                                                                                 | Ginsenoside Rc <sup>a</sup>                                                              |
| R71 | 18.48 | C <sub>36</sub> H <sub>62</sub> O <sub>9</sub>   | 637.4325  | 1.41  | 475.3795[M-H-Glc] <sup>-</sup>                                                                                                                                                                                                                                                       | Ginsenoside 20(R)-Rh <sub>1</sub> <sup>a</sup>                                           |
| R72 | 18.54 | C <sub>58</sub> H <sub>98</sub> O <sub>26</sub>  | 1209.6263 | -0.41 | 1077.5829[M-H-Xyl] <sup>-</sup> ,<br>945.5496[M-H-Xyl-Ara(p)] <sup>-</sup> ,<br>783.4918[M-H-Xyl-Ara(p)-Glc] <sup>-</sup> ,<br>621.4398[M-H-Xyl-Ara(p)-2Glc] <sup>-</sup> ,<br>459.3823[M-H-Xyl-Ara(p)-3Glc] <sup>-</sup>                                                            | Ginsenoside Ra <sub>1</sub> <sup>a</sup>                                                 |
| R73 | 18.58 | C <sub>57</sub> H <sub>94</sub> O <sub>26</sub>  | 1193.5953 | -0.17 | 1107.5951[M-H-Malonyl] <sup>-</sup> ,<br>945.5403[M-H-Malonyl-Glc] <sup>-</sup> ,<br>783.4901[M-H-Malonyl-2Glc] <sup>-</sup> ,<br>621.4357[M-H-Malonyl-3Glc] <sup>-</sup> ,<br>459.3842[M-H-Malonyl-4Glc] <sup>-</sup>                                                               | Malonyl-ginsenoside Rb <sub>1</sub> isomer                                               |
| R74 | 18.70 | C <sub>48</sub> H <sub>76</sub> O <sub>19</sub>  | 955.4907  | 0.42  | 793.4379[M-H-Glc] <sup>-</sup> ,<br>731.4362[M-H-Glc-CO <sub>2</sub> -H <sub>2</sub> O] <sup>-</sup> ,<br>613.3737[M-H-2Glc-H <sub>2</sub> O] <sup>-</sup> ,<br>569.3851[M-H-2Glc-H <sub>2</sub> O-CO <sub>2</sub> ] <sup>-</sup>                                                    | Ginsenoside Ro <sup>a</sup>                                                              |

|     |       |                                                  |           |       |                                                                                                                                                                                                                                                                                     |                                                                                                   |
|-----|-------|--------------------------------------------------|-----------|-------|-------------------------------------------------------------------------------------------------------------------------------------------------------------------------------------------------------------------------------------------------------------------------------------|---------------------------------------------------------------------------------------------------|
| R75 | 18.78 | C <sub>56</sub> H <sub>92</sub> O <sub>25</sub>  | 1163.5842 | -0.60 | 455.3528[M-H-2Glc-Glu A] <sup>-</sup><br>1077.5850[M-H-Malonyl] <sup>-</sup> ,<br>945.5405[M-H-Malonyl-Ara(f)] <sup>-</sup> ,<br>783.4891[M-H-Malonyl-Ara(f)-Glc] <sup>-</sup> ,<br>621.4354[M-H-Malonyl-Ara(f)-2Glc]<br>],<br>459.3852[M-H-Malonyl-Ara(f)-3Glc]<br>] <sup>-</sup>  | Malonyl-ginsenoside Rc                                                                            |
| R76 | 18.86 | C <sub>58</sub> H <sub>98</sub> O <sub>26</sub>  | 1209.6248 | -1.65 | 1077.5869[M-H-Xyl] <sup>-</sup> ,<br>945.5433[M-H-Xyl-Ara] <sup>-</sup> ,<br>783.4961[M-H-Xyl-Ara-Glc] <sup>-</sup> ,<br>621.4344[M-H-Xyl-Ara-2Glc] <sup>-</sup> ,<br>459.3845[M-H-Xyl-Ara-3Glc] <sup>-</sup>                                                                       | Ginsenoside Ra <sub>1</sub><br>isomer/Ginsenoside Ra <sub>2</sub><br>isomer                       |
| R77 | 18.96 | C <sub>62</sub> H <sub>102</sub> O <sub>30</sub> | 1325.6382 | 0.30  | 1239.6331[M-H-Malonyl] <sup>-</sup> ,<br>1107.5958[M-H-Malonyl-Xyl] <sup>-</sup> ,<br>945.5432[M-H-Malonyl-Xyl-Glc] <sup>-</sup> ,<br>783.4890[M-H-Malonyl-Xyl-2Glc] <sup>-</sup> ,<br>621.4368[M-H-Malonyl-Xyl-3Glc] <sup>-</sup> ,<br>459.3842[M-H-Malonyl-Xyl-4Glc] <sup>-</sup> | Malonyl-notoginsenoside<br>R <sub>4</sub><br>isomer/Malonyl-ginsenoside<br>Ra <sub>3</sub> isomer |
| R78 | 19.03 | C <sub>58</sub> H <sub>98</sub> O <sub>26</sub>  | 1209.6252 | -1.32 | 1077.5842[M-H-Xyl] <sup>-</sup> ,<br>945.5430[M-H-Xyl-Ara] <sup>-</sup> ,<br>783.4901[M-H-Xyl-Ara-Glc] <sup>-</sup> ,<br>621.4365[M-H-Xyl-Ara-2Glc] <sup>-</sup> ,<br>459.3849[M-H-Xyl-Ara-3Glc] <sup>-</sup>                                                                       | Ginsenoside Ra <sub>1</sub><br>isomer/Ginsenoside Ra <sub>2</sub><br>isomer                       |
| R79 | 19.03 | C <sub>57</sub> H <sub>94</sub> O <sub>26</sub>  | 1193.5946 | -0.75 | 1107.6008[M-H-Malonyl] <sup>-</sup> ,<br>945.5464[M-H-Malonyl-Glc] <sup>-</sup> ,<br>783.4849[M-H-Malonyl-2Glc] <sup>-</sup> ,<br>621.4401[M-H-Malonyl-3Glc] <sup>-</sup> ,<br>459.3840[M-H-Malonyl-4Glc] <sup>-</sup>                                                              | Malonyl-ginsenoside Rb <sub>1</sub><br>isomer                                                     |
| R80 | 19.07 | C <sub>47</sub> H <sub>74</sub> O <sub>18</sub>  | 925.4801  | 0.43  | 793.4316[M-H-Xyl/Ara] <sup>-</sup> ,<br>613.3721[M-H-Xyl/Ara(f)-Glc-H <sub>2</sub> O] <sup>-</sup> ,<br>455.3538[M-H-Xyl/Ara(f)-Glc-Glu<br>A] <sup>-</sup>                                                                                                                          | Pseudo-ginsenoside-RT <sub>1</sub>                                                                |
| R81 | 19.10 | C <sub>53</sub> H <sub>90</sub> O <sub>22</sub>  | 1077.5848 | 0.28  | 945.5414[M-H-Ara(p)] <sup>-</sup> ,<br>783.4916[M-H-Ara(p)-Glc] <sup>-</sup> ,<br>621.4418[M-H-Ara(p)-2Glc] <sup>-</sup> ,<br>459.3886[M-H-Ara(p)-3Glc] <sup>-</sup>                                                                                                                | Ginsenoside Rb <sub>2</sub> <sup>a</sup>                                                          |
| R82 | 19.28 | C <sub>53</sub> H <sub>90</sub> O <sub>22</sub>  | 1077.5854 | 0.84  | 945.5438[M-H-Xyl] <sup>-</sup> ,<br>783.4904[M-H-Xyl-Glc] <sup>-</sup> ,<br>621.4388[M-H-Xyl-2Glc] <sup>-</sup> ,<br>459.3851[M-H-Xyl-3Glc] <sup>-</sup>                                                                                                                            | Ginsenoside Rb <sub>3</sub> <sup>a</sup>                                                          |
| R83 | 19.39 | C <sub>56</sub> H <sub>92</sub> O <sub>25</sub>  | 1163.5847 | -0.17 | 1077.5853[M-H-Malonyl] <sup>-</sup> ,<br>945.5468[M-H-Malonyl-Ara(p)] <sup>-</sup> ,<br>783.4906[M-H-Malonyl-Ara(p)-Glc] <sup>-</sup>                                                                                                                                               | Malonyl-ginsenoside Rb <sub>2</sub>                                                               |



|     |       |                                                  |           |       |                                                                                                                                                                                                                                                                              |                                           |
|-----|-------|--------------------------------------------------|-----------|-------|------------------------------------------------------------------------------------------------------------------------------------------------------------------------------------------------------------------------------------------------------------------------------|-------------------------------------------|
|     |       |                                                  |           |       | 621.4352[M-H-Malonyl-Ara(p)-2Glc]<br>],<br>459.3855[M-H-Malonyl-Ara(p)-3Glc]<br>]                                                                                                                                                                                            |                                           |
| R84 | 19.45 | C <sub>47</sub> H <sub>74</sub> O <sub>18</sub>  | 925.4797  | 0.00  | 793.4379[M-H-Xyl] <sup>-</sup> ,<br>613.3748[M-H-Xyl-Glc-H <sub>2</sub> O] <sup>-</sup> ,<br>455.3550[M-H-Xyl-Glc-Glu A] <sup>-</sup>                                                                                                                                        | Pseudoginsenoside-RT <sub>1</sub>         |
| R85 | 19.55 | C <sub>56</sub> H <sub>92</sub> O <sub>25</sub>  | 1163.5849 | 0.00  | 1077.5847[M-H-Malonyl] <sup>-</sup> ,<br>945.5458[M-H-Malonyl-Xyl] <sup>-</sup> ,<br>783.4883[M-H-Malonyl-Xyl-Glc] <sup>-</sup> ,<br>621.4370[M-H-Malonyl-Xyl-2Glc] <sup>-</sup> ,<br>459.3842[M-H-Malonyl-Xyl-3Glc] <sup>-</sup>                                            | Malonyl-ginsenoside Rb <sub>3</sub>       |
| R86 | 19.76 | C <sub>56</sub> H <sub>94</sub> O <sub>24</sub>  | 1149.6056 | -0.09 | 1107.5984[M-H-Ac] <sup>-</sup> ,<br>945.5443[M-H-Ac-Glc] <sup>-</sup> ,<br>783.4930[M-H-Ac-2Glc] <sup>-</sup> ,<br>621.4387[M-H-Ac-3Glc] <sup>-</sup> , 459.3842<br>[M-H-Ac-4Glc] <sup>-</sup>                                                                               | Quinquenoside R <sub>1</sub> <sup>a</sup> |
| R87 | 19.84 | C <sub>42</sub> H <sub>66</sub> O <sub>14</sub>  | 793.4377  | 0.38  | 631.3846[M-H-Glc] <sup>-</sup> ,<br>455.3521[M-H-Glc-Glu A] <sup>-</sup>                                                                                                                                                                                                     | Chikusetsusaponin Iva<br>isomer           |
| R88 | 19.99 | C <sub>56</sub> H <sub>94</sub> O <sub>24</sub>  | 1149.6072 | 1.30  | 1107.5972[M-H-Ac] <sup>-</sup> ,<br>945.5375[M-H-Ac-Glc] <sup>-</sup> ,<br>783.5005[M-H-Ac-2Glc] <sup>-</sup> ,<br>621.4395[M-H-Ac-3Glc] <sup>-</sup> ,<br>459.3839[M-H-Ac-4Glc] <sup>-</sup>                                                                                | Quinquenoside R <sub>1</sub> isomer       |
| R89 | 20.25 | C <sub>42</sub> H <sub>66</sub> O <sub>14</sub>  | 793.4368  | -0.76 | 631.3853[M-H-Glc] <sup>-</sup> ,<br>455.3568[M-H-Glc-Glu A] <sup>-</sup>                                                                                                                                                                                                     | Chikusetsusaponin Iva                     |
| R90 | 20.28 | C <sub>60</sub> H <sub>100</sub> O <sub>27</sub> | 1251.6389 | 1.20  | 1209.6250[M-H-Ac] <sup>-</sup> ,<br>1077.5850[M-H-Ac-Xyl] <sup>-</sup> ,<br>945.5430[M-H-Ac-Xyl-ara(p)] <sup>-</sup> ,<br>783.4898[M-H-Ac-Xyl-ara(p)-Glc] <sup>-</sup> ,<br>621.4366[M-H-Ac-Xyl-ara(p)-2Glc] <sup>-</sup> ,<br>459.3861[M-H-Ac-Xyl-ara(p)-3Glc] <sup>-</sup> | Ginsenoside Ra <sub>5</sub>               |
| R91 | 20.38 | C <sub>55</sub> H <sub>92</sub> O <sub>23</sub>  | 1119.5959 | 0.71  | 1077.5864[M-H-Ac] <sup>-</sup> ,<br>945.5432[M-H-Ac-Ara(f)] <sup>-</sup> ,<br>783.4931[M-H-Ac-Ara(f)-Glc] <sup>-</sup> ,<br>621.4388[M-H-Ac-Ara(f)-2Glc] <sup>-</sup> ,<br>459.3846[M-H-Ac-Ara(f)-3Glc] <sup>-</sup>                                                         | Ginsenoside Rs <sub>2</sub> <sup>a</sup>  |
| R92 | 20.47 | C <sub>48</sub> H <sub>82</sub> O <sub>18</sub>  | 945.5430  | 0.74  | 783.4905[M-H-Glc] <sup>-</sup> ,<br>621.4374[M-H-2Glc] <sup>-</sup> ,<br>459.3848[M-H-3Glc] <sup>-</sup>                                                                                                                                                                     | Ginsenoside Rd <sup>a</sup>               |
| R93 | 20.70 | C <sub>60</sub> H <sub>100</sub> O <sub>27</sub> | 1251.6397 | 1.84  | 1209.6279[M-H-Ac] <sup>-</sup> ,<br>1077.5851[M-H-Ac-Xyl] <sup>-</sup> ,<br>945.5422[M-H-Ac-Xyl-ara(p)] <sup>-</sup>                                                                                                                                                         | Ginsenoside Ra <sub>5</sub> isomer        |

|      |       |                                                  |           |       |                                                                                                                                                                                                                                                                                                                                                                                 |                                                                             |
|------|-------|--------------------------------------------------|-----------|-------|---------------------------------------------------------------------------------------------------------------------------------------------------------------------------------------------------------------------------------------------------------------------------------------------------------------------------------------------------------------------------------|-----------------------------------------------------------------------------|
|      |       |                                                  |           |       | 783.4895[M-H-Ac-Xyl-ara(p)-Glc] <sup>-</sup> ,<br>621.4377[M-H-Ac-Xyl-ara(p)-2Glc] <sup>-</sup> ,<br>459.3824[M-H-Ac-Xyl-ara(p)-3Glc] <sup>-</sup>                                                                                                                                                                                                                              |                                                                             |
| R94  | 20.75 | C <sub>51</sub> H <sub>84</sub> O <sub>21</sub>  | 1031.5425 | -0.19 | 945.5433[M-H-Malonyl] <sup>-</sup> ,<br>783.4901[M-H-Malonyl-Glc] <sup>-</sup> ,<br>621.4374[M-H-Malonyl-2Glc] <sup>-</sup> ,<br>459.3849[M-H-Malonyl-3Glc] <sup>-</sup>                                                                                                                                                                                                        | Malonyl-ginsenoside Rd                                                      |
| R95  | 20.91 | C <sub>50</sub> H <sub>84</sub> O <sub>19</sub>  | 987.5528  | -0.10 | 945.5475[M-H-Ac] <sup>-</sup> ,<br>783.4435[M-H-Ac-Glc] <sup>-</sup> ,<br>621.3635[M-H-Ac-2Glc] <sup>-</sup> ,<br>459.3287[M-H-Ac-3Glc] <sup>-</sup>                                                                                                                                                                                                                            | Acetyl-ginsenoside Rd                                                       |
| R96  | 20.95 | C <sub>56</sub> H <sub>94</sub> O <sub>24</sub>  | 1149.6045 | -1.04 | 1107.5840[M-H-Ac] <sup>-</sup> ,<br>945.5441[M-H-Ac-Glc] <sup>-</sup> ,<br>783.4883[M-H-Ac-2Glc] <sup>-</sup> ,<br>621.4357[M-H-Ac-3Glc] <sup>-</sup> ,<br>459.3830[M-H-Ac-4Glc] <sup>-</sup>                                                                                                                                                                                   | Quinquenoside R <sub>1</sub> isomer                                         |
| R97  | 20.99 | C <sub>47</sub> H <sub>74</sub> O <sub>18</sub>  | 925.4813  | 1.73  | 793.4382[M-H-Xyl/Ara] <sup>-</sup> ,<br>613.3756[M-H-Xyl/AraGlc-H <sub>2</sub> O] <sup>-</sup> ,<br>455.3536[M-H-Xyl/Ara-Glc-Glu A] <sup>-</sup>                                                                                                                                                                                                                                | Pseudo-ginsenoside-RT <sub>1</sub><br>isomer/Chikusetsusaponin<br>IV isomer |
| R98  | 20.95 | C <sub>55</sub> H <sub>92</sub> O <sub>23</sub>  | 1119.5952 | 0.09  | 1077.5868[M-H-Ac] <sup>-</sup> ,<br>945.5418[M-H-Ac-Ara(p)] <sup>-</sup> ,<br>783.4923[M-H-Ac-Ara(p)-Glc] <sup>-</sup> ,<br>621.4371[M-H-Ac-Ara(p)-2Glc] <sup>-</sup> ,<br>459.3832[M-H-Ac-Ara(p)-3Glc] <sup>-</sup>                                                                                                                                                            | Ginsenoside Rs <sub>2</sub> isomer                                          |
| R99  | 21.11 | C <sub>62</sub> H <sub>102</sub> O <sub>27</sub> | 1277.6539 | 0.70  | 1209.6308[M-H-(E)-but-2-enoyl] <sup>-</sup> ,<br>1077.5824[M-H-(E)-but-2-enoyl-Xyl]<br>] <sup>-</sup> ,<br>945.5358[M-H-(E)-but-2-enoyl-Xyl-<br>ara(p)] <sup>-</sup> ,<br>783.4861[M-H-(E)-but-2-enoyl-Xyl-<br>ara(p)-Glc] <sup>-</sup> ,<br>621.4417[M-H-(E)-but-2-enoyl-Xyl-<br>ara(p)-2Glc] <sup>-</sup> ,<br>459.3851[M-H-(E)-but-2-enoyl-Xyl-<br>ara(p)-3Glc] <sup>-</sup> | Ginsenoside Ra <sub>4</sub> isomer                                          |
| R100 | 21.23 | C <sub>53</sub> H <sub>86</sub> O <sub>22</sub>  | 1073.5527 | -0.47 | 945.5427[M-H-Malonyl-Ac] <sup>-</sup> ,<br>783.4915[M-H-Malonyl-Ac-Glc] <sup>-</sup> ,<br>621.4370[M-H-Malonyl-Ac-2Glc] <sup>-</sup> ,<br>459.3838[M-H-Malonyl-Ac-3Glc] <sup>-</sup>                                                                                                                                                                                            | Acetyl+Malonyl+Ginsenoside Rd                                               |
| R101 | 21.41 | C <sub>58</sub> H <sub>96</sub> O <sub>24</sub>  | 1175.6215 | 0.17  | 1107.5950[M-H-(E)-but-2-enoyl] <sup>-</sup> ,<br>945.5409[M-H-(E)-but-2-enoyl-Glc]<br>] <sup>-</sup> ,<br>783.4881[M-H-(E)-but-2-enoyl-2Glc]<br>] <sup>-</sup> ,                                                                                                                                                                                                                | Ginsenoside Ra <sub>6</sub>                                                 |

|      |       |                                                  |           |       |                                                                                                                                                                                                                                                                                                               |                                                                 |
|------|-------|--------------------------------------------------|-----------|-------|---------------------------------------------------------------------------------------------------------------------------------------------------------------------------------------------------------------------------------------------------------------------------------------------------------------|-----------------------------------------------------------------|
|      |       |                                                  |           |       | 621.4368[M-H-( <i>E</i> )-but-2-enoyl-3Glc]<br>];<br>459.3838[M-H-( <i>E</i> )-but-2-enoyl-4Glc]<br>];                                                                                                                                                                                                        |                                                                 |
| R102 | 21.44 | C <sub>60</sub> H <sub>100</sub> O <sub>27</sub> | 1251.6384 | 0.80  | 1209.6195[M-H-Ac] <sup>-</sup> ;<br>1077.5830[M-H-Ac-Xyl] <sup>-</sup> ;<br>945.5414[M-H-Ac-Xyl-ara(p)] <sup>-</sup> ;<br>783.4885[M-H-Ac-Xyl-ara(p)-Glc] <sup>-</sup> ;<br>621.4354[M-H-Ac-Xyl-ara(p)-2Glc] <sup>-</sup> ;<br>459.3880[M-H-Ac-Xyl-ara(p)-3Glc] <sup>-</sup>                                  | Ginsenoside Ra <sub>5</sub> isomer                              |
| R103 | 21.50 | C <sub>46</sub> H <sub>76</sub> O <sub>15</sub>  | 867.5113  | 0.81  | 799.4869[M-H-( <i>E</i> )-but-2-enoyl] <sup>-</sup> ;<br>637.4230[M-H-( <i>E</i> )-but-2-enoyl-Glc] <sup>-</sup><br>;<br>475.3830[M-H-( <i>E</i> )-but-2-enoyl-2Glc]<br>];                                                                                                                                    | Koryoginsenoside<br>R <sub>1</sub> /Ginsenoside Re <sub>6</sub> |
| R104 | 21.54 | C <sub>48</sub> H <sub>82</sub> O <sub>18</sub>  | 945.5416  | -0.74 | 783.4899[M-H-Glc] <sup>-</sup> ;<br>621.4362[M-H-2Glc] <sup>-</sup> ;<br>459.3837[M-H-3Glc] <sup>-</sup>                                                                                                                                                                                                      | Ginsenoside Rd isomer                                           |
| R105 | 21.74 | C <sub>58</sub> H <sub>96</sub> O <sub>24</sub>  | 1175.6213 | 0.00  | 1107.4648[M-H-( <i>E</i> )-but-2-enoyl] <sup>-</sup> ;<br>27945.5414[M-H-( <i>E</i> )-but-2-enoyl-Gl<br>c] <sup>-</sup> ;<br>783.4913[M-H-( <i>E</i> )-but-2-enoyl-2Glc]<br>];<br>621.4352[M-H-( <i>E</i> )-but-2-enoyl-3Glc]<br>];<br>459.3857[M-H-( <i>E</i> )-but-2-enoyl-4Glc]<br>];                      | Ginsenoside Ra <sub>6</sub> isomer                              |
| R106 | 21.84 | C <sub>53</sub> H <sub>86</sub> O <sub>22</sub>  | 1073.5527 | -0.47 | 987.5481[M-H-Malonyl] <sup>-</sup> ;<br>945.5444[M-H-Malonyl-Ac] <sup>-</sup> ;<br>783.4901[M-H-Malonyl-Ac-Glc] <sup>-</sup> ;<br>621.4376[M-H-Malonyl-Ac-2Glc] <sup>-</sup> ;<br>459.3846[M-H-Malonyl-Ac-3Glc] <sup>-</sup>                                                                                  | Acetyl+Malonyl+Ginsenoside Rd                                   |
| R107 | 21.85 | C <sub>52</sub> H <sub>86</sub> O <sub>20</sub>  | 1029.5642 | 0.78  | 945.5521[M-H-2Ac] <sup>-</sup> ;<br>783.5035[M-H-2Ac-Glc] <sup>-</sup> ;<br>621.4399[M-H-2Ac-2Glc] <sup>-</sup> ;<br>459.3840[M-H-2Ac-3Glc] <sup>-</sup>                                                                                                                                                      | Acetyl-pseudo-ginsenoside RC <sub>1</sub>                       |
| R108 | 21.86 | C <sub>62</sub> H <sub>102</sub> O <sub>27</sub> | 1277.6537 | 0.55  | 1209.6394[M-H-( <i>E</i> )-but-2-enoyl] <sup>-</sup> ;<br>1077.5834[M-H-( <i>E</i> )-but-2-enoyl-Xyl]<br>];<br>945.5376[M-H-( <i>E</i> )-but-2-enoyl-Xyl-<br>ara(p)] <sup>-</sup> ;<br>783.4856[M-H-( <i>E</i> )-but-2-enoyl-Xyl-<br>ara(p)-Glc] <sup>-</sup> ;<br>621.4391[M-H-( <i>E</i> )-but-2-enoyl-Xyl- | Ginsenoside Ra <sub>4</sub>                                     |

|      |       |                                                 |           |      |                                                                                                                                                                                                                                                                                                                                       |                                                                                             |
|------|-------|-------------------------------------------------|-----------|------|---------------------------------------------------------------------------------------------------------------------------------------------------------------------------------------------------------------------------------------------------------------------------------------------------------------------------------------|---------------------------------------------------------------------------------------------|
|      |       |                                                 |           |      | ara(p)-2Glc] <sup>-</sup> ,<br>459.3857[M-H-( <i>E</i> )-but-2-enoyl-Xyl-<br>ara(p)-3Glc] <sup>-</sup>                                                                                                                                                                                                                                |                                                                                             |
| R109 | 22.05 | C <sub>57</sub> H <sub>94</sub> O <sub>23</sub> | 1145.6122 | 1.22 | 1077.5836[M-H-( <i>E</i> )-but-2-enoyl] <sup>-</sup> ,<br>945.5428[M-H-( <i>E</i> )-but-2-enoyl-Ara] <sup>-</sup><br>,<br>783.4880[M-H-( <i>E</i> )-but-2-enoyl-Ara-<br>Glc] <sup>-</sup> ,<br>621.4377[M-H-( <i>E</i> )-but-2-enoyl-Ara-<br>2Glc] <sup>-</sup> ,<br>459.3861[M-H-( <i>E</i> )-but-2-enoyl-Ara-<br>3Glc] <sup>-</sup> | Ginsenoside<br>Ra <sub>7</sub> /Ginsenoside<br>Ra <sub>8</sub> /Ginsenoside Ra <sub>9</sub> |
| R110 | 22.06 | C <sub>58</sub> H <sub>96</sub> O <sub>25</sub> | 1191.6165 | 0.25 | 945.5482[M-H-2Ac-Glc] <sup>-</sup> ,<br>783.4897[M-H-2Ac-2Glc] <sup>-</sup> ,<br>621.4391[M-H-2Ac-3Glc] <sup>-</sup> ,<br>459.3807[M-H-2Ac-4Glc] <sup>-</sup>                                                                                                                                                                         | Acetyl-quinquenoside R <sub>1</sub>                                                         |
| R111 | 22.11 | C <sub>52</sub> H <sub>86</sub> O <sub>20</sub> | 1029.5645 | 1.07 | 945.5443[M-H-2Ac] <sup>-</sup> ,<br>783.4893[M-H-2Ac-Glc] <sup>-</sup> ,<br>621.4373[M-H-2Ac-2Glc] <sup>-</sup> ,<br>459.3841[M-H-2Ac-3Glc] <sup>-</sup>                                                                                                                                                                              | Acetyl-pseudo-ginsenosid<br>e RC <sub>1</sub>                                               |
| R112 | 22.13 | C <sub>48</sub> H <sub>82</sub> O <sub>18</sub> | 945.5441  | 1.90 | 783.4899[M-H-Glc] <sup>-</sup> ,<br>621.4385[M-H-2Glc] <sup>-</sup> ,<br>459.3848[M-H-3Glc] <sup>-</sup>                                                                                                                                                                                                                              | Ginsenoside Rd isomer                                                                       |
| R113 | 22.13 | C <sub>49</sub> H <sub>78</sub> O <sub>19</sub> | 969.5059  | 0.00 | 807.4559[M-H-Glc] <sup>-</sup> ,<br>645.4022[M-H-2Glc] <sup>-</sup> ,<br>455.3533[M-H-2Glc-CH <sub>2</sub> -Glu A] <sup>-</sup>                                                                                                                                                                                                       | Ginsenoside Ro methyl<br>ester <sup>a</sup>                                                 |
| R114 | 22.37 | C <sub>58</sub> H <sub>96</sub> O <sub>25</sub> | 1191.6169 | 0.59 | 945.5467[M-H-2Ac-Glc] <sup>-</sup> ,<br>783.4882[M-H-2Ac-2Glc] <sup>-</sup> ,<br>621.4377[M-H-2Ac-3Glc] <sup>-</sup> ,<br>459.3858[M-H-2Ac-4Glc] <sup>-</sup>                                                                                                                                                                         | Acetyl-quinquenoside R <sub>1</sub><br>isomer                                               |
| R115 | 22.38 | C <sub>58</sub> H <sub>96</sub> O <sub>24</sub> | 1175.6218 | 0.43 | 1107.5952[M-H-( <i>E</i> )-but-2-enoyl] <sup>-</sup> ,<br>945.5443[M-H-( <i>E</i> )-but-2-enoyl-Glc] <sup>-</sup><br>,<br>783.4917[M-H-( <i>E</i> )-but-2-enoyl-2Glc<br>] <sup>-</sup> ,<br>621.4363[M-H-( <i>E</i> )-but-2-enoyl-3Glc<br>] <sup>-</sup> ,<br>459.3848[M-H-( <i>E</i> )-but-2-enoyl-4Glc<br>] <sup>-</sup>            | Ginsenoside Ra <sub>6</sub> isomer                                                          |
| R116 | 22.53 | C <sub>47</sub> H <sub>80</sub> O <sub>17</sub> | 915.5324  | 0.76 | 783.4891[M-H-Xyl] <sup>-</sup> ,<br>621.4368[M-H-Xyl-Glc] <sup>-</sup> ,<br>459.3842[M-H-Xyl-2Glc] <sup>-</sup>                                                                                                                                                                                                                       | Vina-ginsenoside R <sub>16</sub>                                                            |
| R117 | 22.55 | C <sub>57</sub> H <sub>94</sub> O <sub>23</sub> | 1145.6121 | 1.13 | 1077.5864[M-H-( <i>E</i> )-but-2-enoyl] <sup>-</sup> ,<br>945.5388[M-H-( <i>E</i> )-but-2-enoyl-Ara] <sup>-</sup>                                                                                                                                                                                                                     | Ginsenoside<br>Ra <sub>7</sub> /Ginsenoside                                                 |

|      |       |                                                  |           |      |  |                                                                                                                                                                                                                                                                                                                                                                                                                  |                                                                                       |
|------|-------|--------------------------------------------------|-----------|------|--|------------------------------------------------------------------------------------------------------------------------------------------------------------------------------------------------------------------------------------------------------------------------------------------------------------------------------------------------------------------------------------------------------------------|---------------------------------------------------------------------------------------|
|      |       |                                                  |           |      |  |                                                                                                                                                                                                                                                                                                                                                                                                                  | Ra <sub>8</sub> /Ginsenoside Ra <sub>9</sub>                                          |
|      |       |                                                  |           |      |  | 783.4950[M-H-( <i>E</i> )-but-2-enoyl-Ara-Glc] <sup>-</sup> ,<br>621.4338[M-H-( <i>E</i> )-but-2-enoyl-Ara-2Glc] <sup>-</sup> ,<br>459.3842[M-H-( <i>E</i> )-but-2-enoyl-Ara-3Glc] <sup>-</sup>                                                                                                                                                                                                                  |                                                                                       |
| R118 | 22.55 | C <sub>58</sub> H <sub>96</sub> O <sub>25</sub>  | 1191.6167 | 0.42 |  | 945.5460[M-H-2Ac-Glc] <sup>-</sup> ,<br>783.4899[M-H-2Ac-2Glc] <sup>-</sup> ,<br>621.4369[M-H-2Ac-3Glc] <sup>-</sup> ,<br>459.3852[M-H-2Ac-4Glc] <sup>-</sup>                                                                                                                                                                                                                                                    | Acetyl-quinquenoside R <sub>1</sub> isomer                                            |
| R119 | 22.61 | C <sub>47</sub> H <sub>80</sub> O <sub>17</sub>  | 915.5328  | 1.20 |  | 783.4875[M-H-Xyl] <sup>-</sup> ,<br>621.4374[M-H-Xyl-Glc] <sup>-</sup> ,<br>459.3851[M-H-Xyl-2Glc] <sup>-</sup>                                                                                                                                                                                                                                                                                                  | Gypenoside IX                                                                         |
| R120 | 22.65 | C <sub>62</sub> H <sub>102</sub> O <sub>27</sub> | 1277.6533 | 0.23 |  | 1209.6272[M-H-( <i>E</i> )-but-2-enoyl] <sup>-</sup> ,<br>1077.5864[M-H-( <i>E</i> )-but-2-enoyl-Xyl] <sup>-</sup> ,<br>945.5404[M-H-( <i>E</i> )-but-2-enoyl-Xyl-ara(p)] <sup>-</sup> ,<br>783.4888[M-H-( <i>E</i> )-but-2-enoyl-Xyl-ara(p)-Glc] <sup>-</sup> ,<br>621.4302[M-H-( <i>E</i> )-but-2-enoyl-Xyl-ara(p)-2Glc] <sup>-</sup> ,<br>459.3837[M-H-( <i>E</i> )-but-2-enoyl-Xyl-ara(p)-3Glc] <sup>-</sup> | Ginsenoside Ra <sub>4</sub> isomer                                                    |
| R121 | 22.67 | C <sub>58</sub> H <sub>96</sub> O <sub>25</sub>  | 1191.6169 | 0.59 |  | 945.5380[M-H-2Ac-Glc] <sup>-</sup> ,<br>783.4918[M-H-2Ac-2Glc] <sup>-</sup> ,<br>621.4365[M-H-2Ac-3Glc] <sup>-</sup> ,<br>459.3831[M-H-2Ac-4Glc] <sup>-</sup>                                                                                                                                                                                                                                                    | Acetyl-quinquenoside R <sub>1</sub> isomer                                            |
| R122 | 22.72 | C <sub>47</sub> H <sub>80</sub> O <sub>17</sub>  | 915.5332  | 1.64 |  | 783.4983[M-H-Ara(f)] <sup>-</sup> ,<br>621.4363[M-H-Ara(f)-Glc] <sup>-</sup> ,<br>459.3858[M-H-Ara(f)-2Glc] <sup>-</sup>                                                                                                                                                                                                                                                                                         | Notoginsenoside Fe                                                                    |
| R123 | 22.72 | C <sub>53</sub> H <sub>86</sub> O <sub>22</sub>  | 1073.5532 | 0.00 |  | 945.5435[M-H-Malonyl-Ac] <sup>-</sup> ,<br>783.4878[M-H-Malonyl-Ac-Glc] <sup>-</sup> ,<br>621.4377[M-H-Malonyl-Ac-2Glc] <sup>-</sup> ,<br>459.3854[M-H-Malonyl-Ac-3Glc] <sup>-</sup>                                                                                                                                                                                                                             | Acetyl+Malonyl+Ginsenoside Rd                                                         |
| R124 | 22.87 | C <sub>42</sub> H <sub>72</sub> O <sub>13</sub>  | 783.4908  | 1.66 |  | 621.4396[M-H-Glc] <sup>-</sup> ,<br>475.3831[M-H-Rha-Glc] <sup>-</sup>                                                                                                                                                                                                                                                                                                                                           | Ginsenoside Rg <sub>2</sub> isomer                                                    |
| R125 | 22.91 | C <sub>57</sub> H <sub>94</sub> O <sub>23</sub>  | 1145.6123 | 1.31 |  | 1077.5928[M-H-( <i>E</i> )-but-2-enoyl] <sup>-</sup> ,<br>945.5350[M-H-( <i>E</i> )-but-2-enoyl-Ara] <sup>-</sup> ,<br>783.4876[M-H-( <i>E</i> )-but-2-enoyl-Ara-Glc] <sup>-</sup> ,<br>621.4327[M-H-( <i>E</i> )-but-2-enoyl-Ara-                                                                                                                                                                               | Ginsenoside Ra <sub>7</sub> /Ginsenoside Ra <sub>8</sub> /Ginsenoside Ra <sub>9</sub> |

|      |       |                                                 |           |       |                                                                                                                                                                                                                                                                                                                             |                                                                                                                   |
|------|-------|-------------------------------------------------|-----------|-------|-----------------------------------------------------------------------------------------------------------------------------------------------------------------------------------------------------------------------------------------------------------------------------------------------------------------------------|-------------------------------------------------------------------------------------------------------------------|
|      |       |                                                 |           |       | 2Glc] <sup>-</sup> ,<br>459.3839[M-H-( <i>E</i> )-but-2-enoyl-Ara-3Glc] <sup>-</sup>                                                                                                                                                                                                                                        |                                                                                                                   |
| R126 | 23.24 | C <sub>53</sub> H <sub>86</sub> O <sub>22</sub> | 1073.5530 | -0.19 | 987.5375[M-H-Malonyl] <sup>-</sup> ,<br>945.5438[M-H-Malonyl-Ac] <sup>-</sup> ,<br>783.4887[M-H-Malonyl-Ac-Glc] <sup>-</sup> ,<br>621.4371[M-H-Malonyl-Ac-2Glc] <sup>-</sup> ,<br>459.3844[M-H-Malonyl-Ac-3Glc] <sup>-</sup>                                                                                                | Acetyl+Malonyl+Ginsenoside Rd                                                                                     |
| R127 | 23.25 | C <sub>57</sub> H <sub>94</sub> O <sub>23</sub> | 1145.6089 | -1.66 | 1077.5844[M-H-( <i>E</i> )-but-2-enoyl] <sup>-</sup> ,<br>945.5438[M-H-( <i>E</i> )-but-2-enoyl-Ara] <sup>-</sup> ,<br>,<br>783.4897[M-H-( <i>E</i> )-but-2-enoyl-Ara-Glc] <sup>-</sup> ,<br>621.4393[M-H-( <i>E</i> )-but-2-enoyl-Ara-2Glc] <sup>-</sup> ,<br>459.3865[M-H-( <i>E</i> )-but-2-enoyl-Ara-3Glc] <sup>-</sup> | Ginsenoside Ra <sub>7</sub><br>isomer/Ginsenoside Ra <sub>8</sub><br>isomer/Ginsenoside Ra <sub>9</sub><br>isomer |
| R128 | 23.25 | C <sub>58</sub> H <sub>96</sub> O <sub>25</sub> | 1191.6168 | 0.50  | 945.5350[M-H-2Ac-Glc] <sup>-</sup> ,<br>783.4876[M-H-2Ac-2Glc] <sup>-</sup> ,<br>621.4327 [M-H-2Ac-3Glc] <sup>-</sup> ,<br>459.3839[M-H-2Ac-4Glc] <sup>-</sup>                                                                                                                                                              | Acetyl-quinquenoside R <sub>1</sub><br>isomer                                                                     |
| R129 | 23.36 | C <sub>42</sub> H <sub>70</sub> O <sub>12</sub> | 765.4796  | 0.91  | 619.4214[M-H-Rha] <sup>-</sup> ,<br>457.3696[M-H-Rha-Glc] <sup>-</sup>                                                                                                                                                                                                                                                      | Ginsenoside F4 <sup>a</sup>                                                                                       |
| R130 | 23.38 | C <sub>42</sub> H <sub>66</sub> O <sub>14</sub> | 793.4376  | 0.25  | 631.3884[M-H-Glc] <sup>-</sup> ,<br>455.3553[M-H-Glc-Glu A] <sup>-</sup>                                                                                                                                                                                                                                                    | Zingibroside R <sub>1</sub> isomer                                                                                |
| R131 | 23.56 | C <sub>48</sub> H <sub>81</sub> O <sub>17</sub> | 929.5485  | 1.18  | 783.4911[M-H-Rha] <sup>-</sup> ,<br>621.4376[M-H-Rha-Glc] <sup>-</sup> ,<br>459.3846[M-H-Rha-2Glc] <sup>-</sup>                                                                                                                                                                                                             | Protopanaxadiol+<br>Rha+2Glc                                                                                      |
| R132 | 23.60 | C <sub>58</sub> H <sub>96</sub> O <sub>25</sub> | 1191.6167 | 0.42  | 945.5438[M-H-2Ac-Glc] <sup>-</sup> ,<br>783.4897[M-H-2Ac-2Glc] <sup>-</sup> ,<br>621.4393 [M-H-2Ac-3Glc] <sup>-</sup> ,<br>459.3865[M-H-2Ac-4Glc] <sup>-</sup>                                                                                                                                                              | Acetyl-quinquenoside R <sub>1</sub><br>isomer                                                                     |
| R133 | 23.64 | C <sub>42</sub> H <sub>70</sub> O <sub>12</sub> | 765.4795  | 0.78  | 619.4216[M-H-Rha] <sup>-</sup> ,<br>457.3698[M-H-Rha-Glc] <sup>-</sup>                                                                                                                                                                                                                                                      | Ginsenoside Rg6 <sup>a</sup>                                                                                      |
| R134 | 23.73 | C <sub>48</sub> H <sub>82</sub> O <sub>18</sub> | 945.5425  | 0.21  | 783.4922[M-H-Glc] <sup>-</sup> ,<br>621.4371[M-H-2Glc] <sup>-</sup> ,<br>459.3831[M-H-3Glc] <sup>-</sup>                                                                                                                                                                                                                    | Ginsenoside Rd isomer                                                                                             |
| R135 | 23.92 | C <sub>44</sub> H <sub>74</sub> O <sub>14</sub> | 825.5000  | 0.00  | 783.4901[M-H-Ac] <sup>-</sup> ,<br>621.4351[M-H-Ac-Glc] <sup>-</sup> ,<br>459.3853[M-H-Ac-2Glc] <sup>-</sup>                                                                                                                                                                                                                | Acetyl-ginsenoside Rg <sub>3</sub>                                                                                |
| R136 | 24.04 | C <sub>42</sub> H <sub>66</sub> O <sub>14</sub> | 793.4367  | -0.88 | 631.3837[M-H-Glc] <sup>-</sup> ,<br>455.3500[M-H-Glc-Glu A] <sup>-</sup>                                                                                                                                                                                                                                                    | Zingibroside R <sub>1</sub>                                                                                       |
| R137 | 24.28 | C <sub>44</sub> H <sub>74</sub> O <sub>14</sub> | 825.5006  | 0.73  | 783.4900[M-H-Ac] <sup>-</sup> ,<br>621.4313[M-H-Ac-Glc] <sup>-</sup>                                                                                                                                                                                                                                                        | Acetyl-ginsenoside Rg <sub>3</sub>                                                                                |

|      |       |                                                  |           |       |                                                                                  |                                                |
|------|-------|--------------------------------------------------|-----------|-------|----------------------------------------------------------------------------------|------------------------------------------------|
| R138 | 24.49 | C <sub>42</sub> H <sub>66</sub> O <sub>14</sub>  | 793.4380  | 0.76  | 459.3844[M-H-Ac-2Glc] <sup>-</sup><br>631.3829[M-H-Glc] <sup>-</sup> ,           | Zingibroside R <sub>1</sub> isomer             |
| R139 | 24.68 | C <sub>42</sub> H <sub>72</sub> O <sub>13</sub>  | 783.4904  | 1.15  | 455.3611[M-H-Glc-Glu A] <sup>-</sup><br>621.4378[M-H-Glc] <sup>-</sup> ,         | Ginsenoside 20(S)-Rg <sub>3</sub> <sup>a</sup> |
| R140 | 24.72 | C <sub>44</sub> H <sub>74</sub> O <sub>14</sub>  | 825.5006  | 0.73  | 459.3845[M-H-2Glc] <sup>-</sup><br>783.4950[M-H-Ac] <sup>-</sup> ,               | Acetyl-ginsenoside Rg <sub>3</sub>             |
| R141 | 24.87 | C <sub>42</sub> H <sub>72</sub> O <sub>13</sub>  | 783.4903  | 1.02  | 621.4360[M-H-Ac-Glc] <sup>-</sup> ,                                              | Ginsenoside 20(R)-Rg <sub>3</sub> <sup>a</sup> |
| R142 | 25.48 | C <sub>41</sub> H <sub>70</sub> O <sub>12</sub>  | 753.4779  | -1.33 | 459.3793[M-H-Ac-2Glc] <sup>-</sup><br>621.4376[M-H-Glc] <sup>-</sup> ,           | Ginsenoside MC                                 |
| R143 | 25.87 | C <sub>65</sub> H <sub>100</sub> O <sub>21</sub> | 1215.6663 | -1.32 | 459.3851[M-H-2Glc] <sup>-</sup><br>621.4398[M-H-Ara] <sup>-</sup>                | Ginsenoside MC                                 |
| R144 | 26.04 | C <sub>65</sub> H <sub>100</sub> O <sub>21</sub> | 1215.6658 | -1.73 | 459.3819[M-H-Ara-Glc] <sup>-</sup><br>955.4944[M-H-Polyacetylene] <sup>-</sup> , | Polyacetyleneginsenoside<br>-Ro isomer         |
| R145 | 26.17 | C <sub>36</sub> H <sub>62</sub> O <sub>8</sub>   | 621.4362  | -0.64 | 793.4407[M-H-Polyacetylene-Glc] <sup>-</sup> ,                                   | Polyacetyleneginsenoside<br>-Ro isomer         |
| R146 | 26.19 | C <sub>65</sub> H <sub>100</sub> O <sub>21</sub> | 1215.6680 | 0.08  | 455.3534[M-H-Polyacetylene-2Glc-<br>Glu A] <sup>-</sup>                          | Polyacetyleneginsenoside<br>-Ro isomer         |
| R147 | 27.14 | C <sub>36</sub> H <sub>62</sub> O <sub>8</sub>   | 621.4360  | -0.97 | 793.4395[M-H-Polyacetylene-Glc] <sup>-</sup> ,                                   | Ginsenoside Compound<br>K                      |
| R148 | 27.27 | C <sub>36</sub> H <sub>62</sub> O <sub>8</sub>   | 621.4371  | 0.80  | 455.3527[M-H-Polyacetylene-2Glc-<br>Glu A] <sup>-</sup>                          | Polyacetyleneginsenoside<br>-Ro                |
|      |       |                                                  |           |       | 459.3872[M-H-Glc] <sup>-</sup>                                                   | Ginsenoside Compound<br>K                      |
|      |       |                                                  |           |       | 955.4922[M-H-Polyacetylene] <sup>-</sup> ,                                       | Polyacetyleneginsenoside<br>-Ro                |
|      |       |                                                  |           |       | 793.4376[M-H-Polyacetylene-Glc] <sup>-</sup> ,                                   | Polyacetyleneginsenoside<br>-Ro                |
|      |       |                                                  |           |       | 455.3531[M-H-Polyacetylene-2Glc-<br>Glu A] <sup>-</sup>                          | Polyacetyleneginsenoside<br>-Ro                |
|      |       |                                                  |           |       | 459.3807[M-H-Glc] <sup>-</sup>                                                   | Ginsenoside 20(S)-Rh <sub>2</sub> <sup>a</sup> |
|      |       |                                                  |           |       | 459.3869[M-H-Glc] <sup>-</sup>                                                   | Ginsenoside 20(R)-Rh <sub>2</sub> <sup>a</sup> |

Saponins from *Astragali Radix*

|    |       |                                                 |          |       |                                                                            |                                |
|----|-------|-------------------------------------------------|----------|-------|----------------------------------------------------------------------------|--------------------------------|
| H1 | 14.71 | C <sub>47</sub> H <sub>78</sub> O <sub>19</sub> | 945.5070 | 1.16  | 783.4504[M-H-Glc] <sup>-</sup> ,                                           | Astragaloside VII              |
| H2 | 16.03 | C <sub>47</sub> H <sub>78</sub> O <sub>19</sub> | 945.5063 | 0.42  | 489.3577[M-H-2Glc-Xyl] <sup>-</sup><br>783.4534[M-H-Glc] <sup>-</sup> ,    | Astragaloside V                |
| H3 | 16.67 | C <sub>49</sub> H <sub>80</sub> O <sub>20</sub> | 987.5167 | 0.20  | 489.3585[M-H-2Glc-Xyl] <sup>-</sup><br>945.5074[M-H-Ac] <sup>-</sup> ,     | Agroastragaloside<br>IV isomer |
| H4 | 16.90 | C <sub>41</sub> H <sub>68</sub> O <sub>14</sub> | 783.4536 | -0.64 | 927.4952[M-H-Ac-H <sub>2</sub> O] <sup>-</sup> ,                           | Agroastragaloside<br>IV isomer |
| H5 | 17.11 | C <sub>49</sub> H <sub>80</sub> O <sub>20</sub> | 987.5170 | 0.51  | 783.4525[M-H-Ac-Glc] <sup>-</sup> ,                                        | Agroastragaloside<br>IV isomer |
|    |       |                                                 |          |       | 765.4435[M-H-Ac-Glc-H <sub>2</sub> O] <sup>-</sup> ,                       | Agroastragaloside<br>IV isomer |
|    |       |                                                 |          |       | 621.3989[M-H-Ac-2Glc] <sup>-</sup> ,                                       | Agroastragaloside<br>IV isomer |
|    |       |                                                 |          |       | 489.3623[M-H-Ac-2Glc-Xyl] <sup>-</sup><br>621.3996[M-H-Glc] <sup>-</sup> , | Agroastragaloside<br>IV isomer |
|    |       |                                                 |          |       | 489.3577[M-H-Glc-Xyl] <sup>-</sup><br>945.5097[M-H-Ac] <sup>-</sup> ,      | Agroastragaloside<br>IV isomer |
|    |       |                                                 |          |       | 783.4512[M-H-Ac-Glc] <sup>-</sup> ,                                        | Agroastragaloside<br>IV isomer |
|    |       |                                                 |          |       | 489.3643[M-H-Ac-2Glc-Xyl] <sup>-</sup>                                     | Agroastragaloside<br>IV isomer |

|     |       |                                                 |           |       |                                                                                                                                                                                                                                                                       |                                 |
|-----|-------|-------------------------------------------------|-----------|-------|-----------------------------------------------------------------------------------------------------------------------------------------------------------------------------------------------------------------------------------------------------------------------|---------------------------------|
| H6  | 17.69 | C <sub>49</sub> H <sub>80</sub> O <sub>20</sub> | 987.5159  | -0.61 | 945.5087 [M-H-Ac] <sup>-</sup> ,<br>927.4955[M-H-Ac-H <sub>2</sub> O] <sup>-</sup> ,<br>783.4543[M-H-Ac-Glc] <sup>-</sup> ,<br>765.4478[M-H-Ac-Glc-H <sub>2</sub> O] <sup>-</sup> ,<br>621.3989[M-H-Ac-2Glc] <sup>-</sup> ,<br>489.3623[M-H-Ac-2Glc-Xyl] <sup>-</sup> | Agroastragaloside<br>IV isomer  |
| H7  | 17.77 | C <sub>43</sub> H <sub>70</sub> O <sub>15</sub> | 825.4646  | 1.21  | 783.4485[M-H-Ac] <sup>-</sup> ,<br>621.3974[M-H-Ac-Glc] <sup>-</sup> ,<br>489.3589[M-H-Ac-Glc-Xyl] <sup>-</sup>                                                                                                                                                       | Astragaloside II<br>isomer      |
| H8  | 18.28 | C <sub>51</sub> H <sub>82</sub> O <sub>21</sub> | 1029.5266 | -0.39 | 945.5078[M-H-2Ac] <sup>-</sup> ,<br>927.4976[M-H-2Ac-H <sub>2</sub> O] <sup>-</sup> ,<br>783.4511[M-H-2Ac-Glc] <sup>-</sup> ,<br>765.4457[M-H-2Ac-Glc-H <sub>2</sub> O] <sup>-</sup>                                                                                  | Agroastragaloside<br>III isomer |
| H9  | 18.40 | C <sub>47</sub> H <sub>78</sub> O <sub>19</sub> | 945.5051  | -0.85 | 783.4573[M-H-Glc] <sup>-</sup> ,<br>489.3593[M-H-2Glc-Xyl] <sup>-</sup>                                                                                                                                                                                               | Astragaloside VI                |
| H10 | 18.72 | C <sub>51</sub> H <sub>82</sub> O <sub>21</sub> | 1029.5265 | -0.49 | 927.5116[M-H-2Ac-H <sub>2</sub> O] <sup>-</sup> ,<br>765.4478[M-H-2Ac-H <sub>2</sub> O-Glc] <sup>-</sup>                                                                                                                                                              | Agroastragaloside<br>III isomer |
| H11 | 18.80 | C <sub>43</sub> H <sub>70</sub> O <sub>15</sub> | 825.4640  | 0.48  | 783.4541 [M-H-Ac] <sup>-</sup> ,<br>621.3977[M-H-Ac-Glc] <sup>-</sup> ,<br>489.3585[M-H-Ac-Glc-Xyl] <sup>-</sup>                                                                                                                                                      | Astragaloside II<br>isomer      |
| H12 | 19.48 | C <sub>49</sub> H <sub>80</sub> O <sub>20</sub> | 987.5172  | 0.71  | 945.5061 [M-H-Ac] <sup>-</sup> ,<br>927.4971[M-H-Ac-H <sub>2</sub> O] <sup>-</sup> ,<br>783.4526[M-H-Ac-Glc] <sup>-</sup> ,<br>765.4396[M-H-Ac-H <sub>2</sub> O-Glc] <sup>-</sup> ,<br>621.4099[M-H-Ac-2Glc] <sup>-</sup> ,<br>489.3492[M-H-Ac-2Glc-Xyl] <sup>-</sup> | Agroastragaloside<br>IV isomer  |
| H13 | 19.72 | C <sub>41</sub> H <sub>68</sub> O <sub>14</sub> | 783.4535  | 0.51  | 621.3884[M-H-Glc] <sup>-</sup> ,<br>489.3532[M-H-Glc-Xyl] <sup>-</sup>                                                                                                                                                                                                | Astragaloside IV <sup>a</sup>   |
| H14 | 19.90 | C <sub>43</sub> H <sub>70</sub> O <sub>15</sub> | 825.4645  | 1.09  | 783.4624[M-H-Ac] <sup>-</sup> ,<br>621.3972[M-H-Ac-Glc] <sup>-</sup> ,<br>489.3575[M-H-Ac-Glc-Xyl] <sup>-</sup>                                                                                                                                                       | Astragaloside II<br>isomer      |
| H15 | 20.22 | C <sub>49</sub> H <sub>80</sub> O <sub>20</sub> | 987.5171  | 0.61  | 945.5200[M-H-Ac] <sup>-</sup> ,<br>783.4661[M-H-Ac-Glc] <sup>-</sup> ,<br>489.3623[M-H-Ac-2Glc-Xyl] <sup>-</sup>                                                                                                                                                      | Agroastragaloside<br>IV isomer  |
| H16 | 20.64 | C <sub>43</sub> H <sub>70</sub> O <sub>15</sub> | 825.4642  | 0.73  | 783.4567[M-H-Ac] <sup>-</sup> ,<br>489.3588[M-H-Ac-Glc-Xyl] <sup>-</sup>                                                                                                                                                                                              | Astragaloside II<br>isomer      |
| H17 | 20.70 | C <sub>51</sub> H <sub>82</sub> O <sub>21</sub> | 1029.5267 | -0.29 | 945.5063[M-H-2Ac] <sup>-</sup> ,<br>927.4969[M-H-2Ac-H <sub>2</sub> O] <sup>-</sup> ,<br>783.4714[M-H-2Ac-Glc] <sup>-</sup> ,<br>765.4423[M-H-2Ac-Glc-H <sub>2</sub> O] <sup>-</sup> ,<br>621.4058783.4714[M-H-2Ac-2Glc] <sup>-</sup>                                 | Agroastragaloside<br>III        |
| H18 | 21.44 | C <sub>43</sub> H <sub>70</sub> O <sub>15</sub> | 825.4644  | 0.97  | 783.4563[M-H-Ac] <sup>-</sup> ,<br>621.3985[M-H-Ac-Glc] <sup>-</sup> ,<br>489.3577[M-H-Ac-Glc-Xyl] <sup>-</sup>                                                                                                                                                       | Astragaloside II <sup>a</sup>   |



|     |       |                                                 |          |       |                                                                                                                  |                              |
|-----|-------|-------------------------------------------------|----------|-------|------------------------------------------------------------------------------------------------------------------|------------------------------|
| H19 | 21.62 | C <sub>43</sub> H <sub>70</sub> O <sub>15</sub> | 825.4639 | 0.36  | 783.4533[M-H-Ac] <sup>-</sup> ,<br>621.3995[M-H-Ac-Glc] <sup>-</sup> ,<br>489.3585[M-H-Ac-Glc-Xyl] <sup>-</sup>  | Astragaloside II<br>isomer   |
| H20 | 22.17 | C <sub>47</sub> H <sub>76</sub> O <sub>17</sub> | 911.5016 | 1.32  | 765.4301[M-H-Rha] <sup>-</sup>                                                                                   | Astragaloside VIII           |
| H21 | 22.23 | C <sub>49</sub> H <sub>80</sub> O <sub>20</sub> | 987.5167 | 0.20  | 945.5215[M-H-Ac] <sup>-</sup> ,<br>783.4659[M-H-Ac-Glc] <sup>-</sup> ,<br>489.3621[M-H-Ac-2Glc-Xyl] <sup>-</sup> | Agroastragaloside<br>IV      |
| H22 | 22.25 | C <sub>48</sub> H <sub>78</sub> O <sub>18</sub> | 941.5106 | -0.42 | 795.4499[M-H-Rha] <sup>-</sup>                                                                                   | Soyasaponin I                |
| H23 | 22.96 | C <sub>45</sub> H <sub>72</sub> O <sub>16</sub> | 867.4746 | 0.46  | 765.5357[M-H-2Ac-H <sub>2</sub> O] <sup>-</sup>                                                                  | Astragaloside I              |
| H24 | 23.44 | C <sub>47</sub> H <sub>76</sub> O <sub>17</sub> | 911.5011 | 0.77  | 765.4304[M-H-Rha] <sup>-</sup>                                                                                   | Astragaloside VIII<br>isomer |
| H25 | 23.61 | C <sub>47</sub> H <sub>74</sub> O <sub>17</sub> | 909.4855 | 0.77  | 783.4506[M-H-3Ac] <sup>-</sup> ,<br>765.4476[M-H-3Ac-H <sub>2</sub> O] <sup>-</sup>                              | Acetylastragalosid<br>e I    |

a: Compound identified by comparison with the reference standards .

Table S2 Flavonoids from ZKYY

| No.                                    | t <sub>R</sub><br>(min) | Molecular<br>formula                            | Measured<br>value (m/z) | Diff<br>(ppm) | Product ions                                                                                                                         | Compound name                                                            |
|----------------------------------------|-------------------------|-------------------------------------------------|-------------------------|---------------|--------------------------------------------------------------------------------------------------------------------------------------|--------------------------------------------------------------------------|
| Flavonoids from <i>Astragali Radix</i> |                         |                                                 |                         |               |                                                                                                                                      |                                                                          |
| H26                                    | 5.31                    | C <sub>22</sub> H <sub>22</sub> O <sub>11</sub> | 461.1090                | 1.30          | 299.0554[M-H-Glc] <sup>-</sup> ,<br>284.0328[M-H-Glc-CH <sub>3</sub> ] <sup>-</sup>                                                  | Kaempferol-4'-m<br>ethoxy-3-O-β-D-<br>glucopyranoside<br>isomer          |
| H27                                    | 6.56                    | C <sub>25</sub> H <sub>28</sub> O <sub>11</sub> | 503.1558                | 0.99          | 299.0563[M-H-(6'-acetyl)Glc] <sup>-</sup> ,<br>284.0327[M-H-(6'-acetyl)Glc-CH <sub>3</sub> ] <sup>-</sup>                            | (-)-Methylinissol<br>in<br>3-O-β-D-(6'-acet<br>yl)-glucoside<br>daidzein |
| H28                                    | 7.18                    | C <sub>21</sub> H <sub>20</sub> O <sub>9</sub>  | 415.1032                | 0.72          | 253.0495[M-H-Glc] <sup>-</sup>                                                                                                       | 7-O-β-D-glucosi<br>de                                                    |
| H29                                    | 7.39                    | C <sub>22</sub> H <sub>22</sub> O <sub>11</sub> | 461.1086                | 0.43          | 299.0565[M-H-Glc] <sup>-</sup> ,<br>284.032354[M-H-Glc-CH <sub>3</sub> ] <sup>-</sup>                                                | Kaempferol-4'-m<br>ethoxy-3-O-β-D-<br>glucopyranoside<br>daidzein isomer |
| H30                                    | 7.54                    | C <sub>15</sub> H <sub>10</sub> O <sub>4</sub>  | 253.0502                | 0.40          | 201.0707[M-H-C <sub>2</sub> H <sub>2</sub> O] <sup>-</sup>                                                                           | Daidzein isomer                                                          |
| H31                                    | 7.82                    | C <sub>21</sub> H <sub>20</sub> O <sub>9</sub>  | 415.1026                | -0.72         | 253.0503[M-H-Glc] <sup>-</sup>                                                                                                       | 7-O-β-D-glucosi<br>de isomer                                             |
| H32                                    | 7.97                    | C <sub>22</sub> H <sub>22</sub> O <sub>10</sub> | 445.1140                | 1.12          | 430.0913[M-H-CH <sub>3</sub> ] <sup>-</sup> ,<br>283.0595[M-H-Glc] <sup>-</sup> ,<br>268.0370[M-H-CH <sub>3</sub> -Glc] <sup>-</sup> | calycosin-7-O-β-<br>D-glucoside                                          |
| H33                                    | 8.54                    | C <sub>16</sub> H <sub>12</sub> O <sub>5</sub>  | 283.0610                | 1.41          | 268.0383[M-H-CH <sub>3</sub> ] <sup>-</sup> ,<br>240.0429[M-H-CH <sub>3</sub> -CO] <sup>-</sup>                                      | Calycosin isomer                                                         |

|     |       |                                                 |          |      |                                                                                                                                                                                                                                                    |                                            |
|-----|-------|-------------------------------------------------|----------|------|----------------------------------------------------------------------------------------------------------------------------------------------------------------------------------------------------------------------------------------------------|--------------------------------------------|
|     |       |                                                 |          |      | 239.0355[M-H-CO <sub>2</sub> ] <sup>-</sup> ,<br>224.0489[M-H-CO <sub>2</sub> -CH <sub>3</sub> ] <sup>-</sup><br>301.0716[M-H-Glc] <sup>-</sup>                                                                                                    | Quercetin-3-O-β-D-glucopyranoside          |
| H34 | 8.58  | C <sub>21</sub> H <sub>20</sub> O <sub>12</sub> | 463.0880 | 0.65 |                                                                                                                                                                                                                                                    |                                            |
| H35 | 8.74  | C <sub>21</sub> H <sub>20</sub> O <sub>12</sub> | 463.0882 | 1.08 | 301.0715[M-H-Glc] <sup>-</sup>                                                                                                                                                                                                                     | Isoquercitrin                              |
| H36 | 8.93  | C <sub>22</sub> H <sub>24</sub> O <sub>10</sub> | 447.1297 | 1.34 | 285.0771[M-H-Glc] <sup>-</sup> ,<br>270.0541[M-H-Glc-CH <sub>3</sub> ] <sup>-</sup>                                                                                                                                                                | licoagroside D                             |
| H37 | 8.94  | C <sub>16</sub> H <sub>14</sub> O <sub>5</sub>  | 285.0768 | 1.75 | 270.0513[M-H-CH <sub>3</sub> ] <sup>-</sup> ,<br>228.0424[M-H-CH <sub>3</sub> -C <sub>2</sub> H <sub>2</sub> O] <sup>-</sup>                                                                                                                       | Vesticarpan isomer                         |
| H38 | 9.34  | C <sub>15</sub> H <sub>10</sub> O <sub>4</sub>  | 253.0505 | 1.58 | 201.0715[M-H-C <sub>2</sub> H <sub>2</sub> O] <sup>-</sup>                                                                                                                                                                                         | Daidzein isomer                            |
| H39 | 9.67  | C <sub>16</sub> H <sub>12</sub> O <sub>5</sub>  | 283.0609 | 1.06 | 268.0379[M-H-CH <sub>3</sub> ] <sup>-</sup> ,<br>240.0430[M-H-CH <sub>3</sub> -CO] <sup>-</sup> ,<br>239.0351[M-H-CO <sub>2</sub> ] <sup>-</sup> ,<br>224.0477[M-H-CO <sub>2</sub> -CH <sub>3</sub> ] <sup>-</sup>                                 | Calycosin isomer                           |
| H40 | 9.71  | C <sub>16</sub> H <sub>12</sub> O <sub>6</sub>  | 299.0562 | 2.01 | 284.0337[M-H-CH <sub>3</sub> ] <sup>-</sup> ,<br>256.0366[M-H-CH <sub>3</sub> -CO] <sup>-</sup>                                                                                                                                                    | Rhamnocitrin isomer                        |
| H41 | 9.77  | C <sub>16</sub> H <sub>14</sub> O <sub>5</sub>  | 285.0768 | 1.75 | 270.0455[M-H-CH <sub>3</sub> ] <sup>-</sup>                                                                                                                                                                                                        | Vesticarpan isomer                         |
| H42 | 9.89  | C <sub>16</sub> H <sub>12</sub> O <sub>5</sub>  | 283.0611 | 1.77 | 268.0383[M-H-CH <sub>3</sub> ] <sup>-</sup> ,<br>240.0434[M-H-CH <sub>3</sub> -CO] <sup>-</sup> ,<br>239.0356[M-H-CO <sub>2</sub> ] <sup>-</sup> ,<br>224.0482[M-H-CO <sub>2</sub> -CH <sub>3</sub> ] <sup>-</sup>                                 | Calycosin isomer                           |
| H43 | 10.08 | C <sub>16</sub> H <sub>12</sub> O <sub>6</sub>  | 299.0561 | 1.67 | 284.0331[M-H-CH <sub>3</sub> ] <sup>-</sup> ,<br>269.0460[M-H-OCH <sub>2</sub> ] <sup>-</sup> ,<br>256.0384[M-H-CH <sub>3</sub> -CO] <sup>-</sup>                                                                                                  | Rhamnocitrin isomer                        |
| H44 | 10.09 | C <sub>22</sub> H <sub>22</sub> O <sub>11</sub> | 461.1086 | 0.43 | 446.0839[M-H-CH <sub>3</sub> ] <sup>-</sup> ,<br>299.0558[M-H-Glc] <sup>-</sup> ,<br>284.0324[M-H-Glc-CH <sub>3</sub> ] <sup>-</sup> ,<br>269.0450[M-H-Glc-OCH <sub>2</sub> ] <sup>-</sup> ,<br>256.0392[M-H-Glc-CH <sub>3</sub> -CO] <sup>-</sup> | Rhamnocitin-3-O-β-D-glucopyranoside isomer |
| H45 | 10.20 | C <sub>15</sub> H <sub>10</sub> O <sub>4</sub>  | 253.0503 | 0.79 | 201.0710[M-H-C <sub>2</sub> H <sub>2</sub> O] <sup>-</sup>                                                                                                                                                                                         | Daidzein isomer                            |
| H46 | 10.21 | C <sub>16</sub> H <sub>12</sub> O <sub>5</sub>  | 283.0609 | 1.06 | 268.0381[M-H-CH <sub>3</sub> ] <sup>-</sup> ,<br>240.0434[M-H-CH <sub>3</sub> -CO] <sup>-</sup> ,<br>239.0354[M-H-CO <sub>2</sub> ] <sup>-</sup> ,<br>224.0488[M-H-CO <sub>2</sub> -CH <sub>3</sub> ] <sup>-</sup>                                 | Calycosin isomer                           |
| H47 | 10.29 | C <sub>17</sub> H <sub>14</sub> O <sub>6</sub>  | 313.0716 | 1.28 | 298.0489[M-H-CH <sub>3</sub> ] <sup>-</sup> ,<br>283.0254[M-H-OCH <sub>2</sub> ] <sup>-</sup> ,<br>270.0534[M-H-CH <sub>3</sub> -CO] <sup>-</sup> ,<br>255.0301[M-H-OCH <sub>2</sub> -CO] <sup>-</sup>                                             | Kumatakenin                                |
| H48 | 10.33 | C <sub>22</sub> H <sub>24</sub> O <sub>10</sub> | 447.1294 | 0.67 | 285.0762[M-H-Glc] <sup>-</sup>                                                                                                                                                                                                                     | licoagroside D isomer                      |
| H49 | 10.35 | C <sub>16</sub> H <sub>14</sub> O <sub>5</sub>  | 285.0768 | 1.75 | 270.0436[M-H-CH <sub>3</sub> ] <sup>-</sup>                                                                                                                                                                                                        | Vesticarpan isomer                         |

|     |       |                                                 |          |      |                                                                                                                                                                                                                    |                                                               |
|-----|-------|-------------------------------------------------|----------|------|--------------------------------------------------------------------------------------------------------------------------------------------------------------------------------------------------------------------|---------------------------------------------------------------|
| H50 | 10.40 | C <sub>16</sub> H <sub>12</sub> O <sub>6</sub>  | 299.0561 | 1.67 | 284.0326[M-H-CH <sub>3</sub> ] <sup>-</sup>                                                                                                                                                                        | Rhamnocitrin isomer                                           |
| H51 | 11.17 | C <sub>15</sub> H <sub>10</sub> O <sub>4</sub>  | 253.0504 | 1.19 | 201.0715[M-H-C <sub>2</sub> H <sub>2</sub> O] <sup>-</sup>                                                                                                                                                         | Daidzein isomer                                               |
| H52 | 11.25 | C <sub>16</sub> H <sub>12</sub> O <sub>6</sub>  | 299.0561 | 1.67 | 284.0278[M-H-CH <sub>3</sub> ] <sup>-</sup> ,<br>269.0359[M-H-OCH <sub>2</sub> ] <sup>-</sup>                                                                                                                      | Rhamnocitrin isomer                                           |
| H53 | 11.29 | C <sub>16</sub> H <sub>14</sub> O <sub>5</sub>  | 285.0763 | 0.00 | 270.0479[M-H-CH <sub>3</sub> ] <sup>-</sup>                                                                                                                                                                        | Vesticarpan isomer                                            |
| H54 | 11.37 | C <sub>22</sub> H <sub>22</sub> O <sub>11</sub> | 461.1090 | 1.30 | 299.0571[M-H-Glc] <sup>-</sup> ,<br>284.0305[M-H-Glc-CH <sub>3</sub> ] <sup>-</sup>                                                                                                                                | Rhamnocitin-3-O-β-D-glucopyranoside isomer                    |
| H55 | 11.50 | C <sub>15</sub> H <sub>10</sub> O <sub>5</sub>  | 269.0455 | 1.86 | 241.0504[M-H-CO] <sup>-</sup>                                                                                                                                                                                      | 5,7,4'-Trihydroxy-isoflavonone isomer                         |
| H56 | 11.72 | C <sub>22</sub> H <sub>22</sub> O <sub>11</sub> | 461.1086 | 0.43 | 299.0570[M-H-Glc] <sup>-</sup> ,<br>284.0301[M-H-Glc-CH <sub>3</sub> ] <sup>-</sup>                                                                                                                                | Rhamnocitin-3-O-β-D-glucopyranoside isomer                    |
| H57 | 11.72 | C <sub>23</sub> H <sub>24</sub> O <sub>11</sub> | 475.1240 | 0.00 | 267.0659[M-H-Glc-OCH <sub>3</sub> -CH <sub>3</sub> ] <sup>-</sup>                                                                                                                                                  | odoratin-7-O-β-D-glucopyranoside                              |
| H58 | 11.72 | C <sub>22</sub> H <sub>22</sub> O <sub>9</sub>  | 429.1190 | 0.93 | 267.0661[M-H-Glc] <sup>-</sup> ,<br>252.0432[M-H-Glc-CH <sub>3</sub> ] <sup>-</sup>                                                                                                                                | Ononin                                                        |
| H59 | 11.77 | C <sub>15</sub> H <sub>10</sub> O <sub>4</sub>  | 253.0505 | 1.58 | 201.0712[M-H-C <sub>2</sub> H <sub>2</sub> O] <sup>-</sup>                                                                                                                                                         | Daidzein                                                      |
| H60 | 11.77 | C <sub>22</sub> H <sub>24</sub> O <sub>10</sub> | 447.1295 | 0.89 | 285.0769[M-H-Glc] <sup>-</sup>                                                                                                                                                                                     | licoaoside D isomer                                           |
| H61 | 11.86 | C <sub>16</sub> H <sub>14</sub> O <sub>5</sub>  | 285.0768 | 1.75 | 270.0536[M-H-CH <sub>3</sub> ] <sup>-</sup>                                                                                                                                                                        | Vesticarpan isomer                                            |
| H62 | 11.87 | C <sub>16</sub> H <sub>12</sub> O <sub>6</sub>  | 299.0561 | 1.67 | 284.0328[M-H-CH <sub>3</sub> ] <sup>-</sup> ,<br>269.0454[M-H-OCH <sub>2</sub> ] <sup>-</sup> ,<br>256.0379[M-H-CH <sub>3</sub> -CO] <sup>-</sup>                                                                  | Rhamnocitrin <sup>a</sup>                                     |
| H63 | 12.61 | C <sub>15</sub> H <sub>10</sub> O <sub>7</sub>  | 301.0349 | 0.33 | 273.0411[M-H-CO] <sup>-</sup> ,<br>257.0460[M-H-CO <sub>2</sub> ] <sup>-</sup> ,<br>245.0458[M-H-2CO] <sup>-</sup> ,<br>229.0499[M-H-CO <sub>2</sub> -CO] <sup>-</sup>                                             | Quercetin <sup>a</sup>                                        |
| H64 | 12.63 | C <sub>15</sub> H <sub>10</sub> O <sub>6</sub>  | 285.0405 | 2.10 | 217.0507[M-H-C <sub>3</sub> O <sub>2</sub> ] <sup>-</sup>                                                                                                                                                          | Kaempferol                                                    |
| H65 | 12.72 | C <sub>23</sub> H <sub>26</sub> O <sub>10</sub> | 461.1450 | 0.43 | 299.0939[M-H-Glc] <sup>-</sup> ,<br>284.0692[M-H-Glc-CH <sub>3</sub> ] <sup>-</sup>                                                                                                                                | (6aR, 11aR)-9,10-Dimethoxypterocarpin-3-O-β-D-glucopyranoside |
| H66 | 12.83 | C <sub>16</sub> H <sub>12</sub> O <sub>5</sub>  | 283.0609 | 1.06 | 268.0379[M-H-CH <sub>3</sub> ] <sup>-</sup> ,<br>240.0431[M-H-CH <sub>3</sub> -CO] <sup>-</sup> ,<br>239.0352[M-H-CO <sub>2</sub> ] <sup>-</sup> ,<br>224.0477[M-H-CO <sub>2</sub> -CH <sub>3</sub> ] <sup>-</sup> | Calycosin                                                     |

|     |       |                                                 |          |      |                                                                                                                                                                                                                                                                        |                                                                                                               |
|-----|-------|-------------------------------------------------|----------|------|------------------------------------------------------------------------------------------------------------------------------------------------------------------------------------------------------------------------------------------------------------------------|---------------------------------------------------------------------------------------------------------------|
| H67 | 12.84 | C <sub>16</sub> H <sub>12</sub> O <sub>6</sub>  | 299.0562 | 2.01 | 284.0337[M-H-CH <sub>3</sub> ] <sup>-</sup>                                                                                                                                                                                                                            | Rhamnocitrin isomer                                                                                           |
| H68 | 12.84 | C <sub>15</sub> H <sub>10</sub> O <sub>4</sub>  | 253.0503 | 0.79 | 201.0715[M-H-C <sub>2</sub> H <sub>2</sub> O] <sup>-</sup>                                                                                                                                                                                                             | Daidzein isomer                                                                                               |
| H69 | 12.94 | C <sub>16</sub> H <sub>14</sub> O <sub>5</sub>  | 285.0768 | 1.75 | 270.0530[M-H-CH <sub>3</sub> ] <sup>-</sup>                                                                                                                                                                                                                            | vesticarpin                                                                                                   |
| H70 | 13.34 | C <sub>17</sub> H <sub>18</sub> O <sub>5</sub>  | 301.1081 | 1.66 | 271.0623[M-H-OCH <sub>2</sub> ] <sup>-</sup> ,<br>203.0864[M-H-OCH <sub>2</sub> -C <sub>3</sub> O <sub>2</sub> ] <sup>-</sup>                                                                                                                                          | 2',8-Dihydroxy-4',7-dimethoxyisoflavan/(3R)-7,2'-Dihydroxy-3',4'-dimethoxyisoflavan/isomucronulatol           |
| H71 | 13.34 | C <sub>16</sub> H <sub>12</sub> O <sub>6</sub>  | 299.0561 | 1.67 | 284.0327[M-H-CH <sub>3</sub> ] <sup>-</sup> ,<br>269.0451[M-H-OCH <sub>2</sub> ] <sup>-</sup> ,<br>256.0366[M-H-CH <sub>3</sub> -CO] <sup>-</sup>                                                                                                                      | Rhamnocitrin isomer                                                                                           |
| H72 | 13.35 | C <sub>23</sub> H <sub>28</sub> O <sub>10</sub> | 463.1604 | 0.00 | 301.1074[M-H-Glc] <sup>-</sup> ,<br>286.0849[M-H-Glc-CH <sub>3</sub> ] <sup>-</sup> ,<br>271.0613[M-H-Glc-2CH <sub>3</sub> ] <sup>-</sup> ,<br>256.0374[M-H-Glc-OCH <sub>2</sub> ] <sup>-</sup> ,<br>227.0708[M-H-Glc-2CH <sub>3</sub> -CO <sub>2</sub> ] <sup>-</sup> | 3S-(-)-Mucronulatol-7-O-β-D-glucopyranoside/ (3R) -7,2'-dihydroxy-3',4'-dimethoxyisoflavone-7-O-β-D-glucoside |
| H73 | 13.36 | C <sub>16</sub> H <sub>12</sub> O <sub>4</sub>  | 267.0662 | 1.87 | 252.0430[M-H-CH <sub>3</sub> ] <sup>-</sup> ,<br>223.0415[M-H-CO <sub>2</sub> ] <sup>-</sup>                                                                                                                                                                           | Formononetin isomer                                                                                           |
| H74 | 13.44 | C <sub>22</sub> H <sub>22</sub> O <sub>11</sub> | 461.1087 | 0.65 | 299.0556[M-H-Glc] <sup>-</sup> ,<br>284.0315[M-H-Glc-CH <sub>3</sub> ] <sup>-</sup> ,<br>269.0445299.0556[M-H-Glc-CO] <sup>-</sup>                                                                                                                                     | Rhamnocitrin-3-O-β-D-glucopyranoside                                                                          |
| H75 | 13.61 | C <sub>16</sub> H <sub>12</sub> O <sub>6</sub>  | 299.0562 | 2.01 | 284.0328[M-H-CH <sub>3</sub> ] <sup>-</sup>                                                                                                                                                                                                                            | Rhamnocitrin isomer                                                                                           |
| H76 | 13.62 | C <sub>24</sub> H <sub>24</sub> O <sub>10</sub> | 471.1295 | 0.85 | 267.0671[M-H-(6''-O-acetyl)Glc] <sup>-</sup> ,<br>252.0419[M-H-(6''-O-acetyl)Glc-CH <sub>3</sub> ] <sup>-</sup>                                                                                                                                                        | 6''-O-acetyl-ononin                                                                                           |
| H77 | 14.12 | C <sub>17</sub> H <sub>18</sub> O <sub>5</sub>  | 301.1081 | 1.66 | 271.0511[M-H-OCH <sub>2</sub> ] <sup>-</sup> ,<br>203.0863[M-H-OCH <sub>2</sub> -C <sub>3</sub> O <sub>2</sub> ] <sup>-</sup>                                                                                                                                          | 2',8-Dihydroxy-4',7-dimethoxyisoflavan/(3R)-7,2'-Dihydroxy-3',4'-dimethoxyisoflavan/isomucronulatol           |
| H78 | 14.30 | C <sub>15</sub> H <sub>10</sub> O <sub>5</sub>  | 269.0455 | 1.86 | 241.0520[M-H-CO] <sup>-</sup>                                                                                                                                                                                                                                          | 5,7,4'-Trihydroxyisoflavonone isomer                                                                          |
| H79 | 14.30 | C <sub>25</sub> H <sub>28</sub> O <sub>11</sub> | 503.1556 | 0.60 | 299.0942[M-H-(6'-acetyl)Glc] <sup>-</sup> ,                                                                                                                                                                                                                            | (-)-Methylinissol                                                                                             |

|                                          |       |                                                 |          |       |                                                                                                                                                                                                                                          |                                                                                                     |
|------------------------------------------|-------|-------------------------------------------------|----------|-------|------------------------------------------------------------------------------------------------------------------------------------------------------------------------------------------------------------------------------------------|-----------------------------------------------------------------------------------------------------|
|                                          |       |                                                 |          |       | 284.0690[M-H-(6'-acetyl)Glc-CH <sub>3</sub> ]                                                                                                                                                                                            | in                                                                                                  |
|                                          |       |                                                 |          |       |                                                                                                                                                                                                                                          | 3-O-β-D-(6'-acetyl)-glucoside                                                                       |
|                                          |       |                                                 |          |       |                                                                                                                                                                                                                                          | isomer                                                                                              |
| H80                                      | 14.38 | C <sub>16</sub> H <sub>14</sub> O <sub>5</sub>  | 285.0768 | 1.75  | 270.0522[M-H-CH <sub>3</sub> ] <sup>-</sup>                                                                                                                                                                                              | Vesticarpan isomer                                                                                  |
| H81                                      | 14.58 | C <sub>15</sub> H <sub>10</sub> O <sub>5</sub>  | 269.0455 | 1.86  | 241.0516[M-H-CO] <sup>-</sup>                                                                                                                                                                                                            | 5,7,4'-Trihydroxy-isoflavone                                                                        |
| H82                                      | 14.96 | C <sub>17</sub> H <sub>18</sub> O <sub>5</sub>  | 301.1081 | 1.66  | 286.0861[M-H-CH <sub>3</sub> ] <sup>-</sup> ,<br>271.0627[M-H-OCH <sub>2</sub> ] <sup>-</sup> ,<br>203.0861[M-H-OCH <sub>2</sub> -C <sub>3</sub> O <sub>2</sub> ] <sup>-</sup>                                                           | 2',8-Dihydroxy-4',7-dimethoxyisoflavan/(3R)-7,2'-Dihydroxy-3',4'-dimethoxyisoflavan/isomucronulatol |
| H83                                      | 15.17 | C <sub>16</sub> H <sub>12</sub> O <sub>6</sub>  | 299.0560 | 1.34  | 284.0331[M-H-CH <sub>3</sub> ] <sup>-</sup> ,<br>269.0455[M-H-OCH <sub>2</sub> ] <sup>-</sup>                                                                                                                                            | Rhamnocitrin isomer                                                                                 |
| H84                                      | 15.25 | C <sub>17</sub> H <sub>16</sub> O <sub>6</sub>  | 315.0873 | 1.27  | 285.0409[M-H-OCH <sub>2</sub> ] <sup>-</sup> ,<br>257.0464[M-H-OCH <sub>2</sub> -CO] <sup>-</sup> ,<br>241.0522[M-H-OCH <sub>2</sub> -CO <sub>2</sub> ] <sup>-</sup> ,<br>211.1346[M-H-2OCH <sub>2</sub> -CO <sub>2</sub> ] <sup>-</sup> | 2',4'-Dihydroxy-5,6-Dimethyisoflavanone                                                             |
| H85                                      | 15.51 | C <sub>16</sub> H <sub>14</sub> O <sub>5</sub>  | 285.0768 | 1.75  | 270.0480[M-H-CH <sub>3</sub> ] <sup>-</sup>                                                                                                                                                                                              | Vesticarpan isomer                                                                                  |
| H86                                      | 15.74 | C <sub>16</sub> H <sub>12</sub> O <sub>6</sub>  | 299.0561 | 1.67  | 284.0329[M-H-CH <sub>3</sub> ] <sup>-</sup>                                                                                                                                                                                              | Rhamnocitrin isomer                                                                                 |
| H87                                      | 16.42 | C <sub>16</sub> H <sub>12</sub> O <sub>5</sub>  | 283.0611 | 1.77  | 268.0377[M-H-CH <sub>3</sub> ] <sup>-</sup> ,<br>240.0429[M-H-CH <sub>3</sub> -CO] <sup>-</sup> ,<br>239.0350[M-H-CO <sub>2</sub> ] <sup>-</sup> ,<br>224.0482[M-H-CO <sub>2</sub> -CH <sub>3</sub> ] <sup>-</sup>                       | Wogonin/Oroxylina A                                                                                 |
| H88                                      | 17.60 | C <sub>16</sub> H <sub>12</sub> O <sub>4</sub>  | 267.0660 | 1.12  | 252.0429[M-H-CH <sub>3</sub> ] <sup>-</sup> ,<br>223.0405[M-H-CO <sub>2</sub> ] <sup>-</sup>                                                                                                                                             | Formononetin                                                                                        |
| H89                                      | 17.78 | C <sub>16</sub> H <sub>12</sub> O <sub>6</sub>  | 299.0556 | 0.00  | 284.0340[M-H-CH <sub>3</sub> ] <sup>-</sup> ,<br>269.0455[M-H-OCH <sub>2</sub> ] <sup>-</sup>                                                                                                                                            | Rhamnocitrin isomer                                                                                 |
| H90                                      | 17.90 | C <sub>16</sub> H <sub>14</sub> O <sub>5</sub>  | 285.0766 | 1.05  | 270.0450[M-H-CH <sub>3</sub> ] <sup>-</sup>                                                                                                                                                                                              | Vesticarpan isomer                                                                                  |
| H91                                      | 18.45 | C <sub>16</sub> H <sub>12</sub> O <sub>6</sub>  | 299.0560 | 1.34  | 284.0325[M-H-CH <sub>3</sub> ] <sup>-</sup> ,<br>269.0457[M-H-OCH <sub>2</sub> ] <sup>-</sup>                                                                                                                                            | Rhamnocitrin isomer                                                                                 |
| H92                                      |       |                                                 |          |       |                                                                                                                                                                                                                                          |                                                                                                     |
| Flavonoids from <i>Corni officinalis</i> |       |                                                 |          |       |                                                                                                                                                                                                                                          |                                                                                                     |
| S64                                      | 5.77  | C <sub>27</sub> H <sub>30</sub> O <sub>15</sub> | 593.1504 | -0.34 | 285.0387[M-H-Gal-Rha] <sup>-</sup>                                                                                                                                                                                                       | Kaempferol-3-O-α-L-rhamnosyl(1-6)-β-D-galactosi                                                     |

|     |      |                                                 |          |       |                                                                                                                                                      |                                                                                 |
|-----|------|-------------------------------------------------|----------|-------|------------------------------------------------------------------------------------------------------------------------------------------------------|---------------------------------------------------------------------------------|
| S65 | 6.03 | C <sub>21</sub> H <sub>22</sub> O <sub>11</sub> | 449.1091 | 1.56  | 287.0569[M-H-Glc] <sup>-</sup> ,<br>269.0457[M-H-C <sub>6</sub> H <sub>12</sub> O <sub>6</sub> ] <sup>-</sup>                                        | de isomer<br>Aromadendrin<br>7-O-β-D-glucosi<br>de isomer                       |
| S66 | 6.21 | C <sub>27</sub> H <sub>30</sub> O <sub>15</sub> | 593.1508 | 0.34  | 431.0997[M-H-Gal] <sup>-</sup> ,<br>285.0405[M-H-Gal-Rha] <sup>-</sup>                                                                               | Kaempferol-3-O-<br>α-L-rhamnosyl(1<br>-6)-β-D-galactosi<br>de isomer            |
| S67 | 6.91 | C <sub>21</sub> H <sub>22</sub> O <sub>11</sub> | 449.1086 | 0.45  | 287.0564[M-H-Glc] <sup>-</sup> ,<br>269.0456[M-H-C <sub>6</sub> H <sub>12</sub> O <sub>6</sub> ] <sup>-</sup> ,<br>259.0613[M-H-Glc-CO] <sup>-</sup> | Aromadendrin<br>7-O-β-D-glucosi<br>de                                           |
| S68 | 7.10 | C <sub>21</sub> H <sub>22</sub> O <sub>11</sub> | 449.1091 | 1.56  | 259.0637[M-H-Glc-CO] <sup>-</sup>                                                                                                                    | Aromadendrin<br>7-O-β-D-glucosi<br>de isomer                                    |
| S69 | 7.40 | C <sub>15</sub> H <sub>12</sub> O <sub>6</sub>  | 287.0558 | 0.70  | 259.0606[M-H-CO] <sup>-</sup> ,<br>243.0672[M-H-CO <sub>2</sub> ] <sup>-</sup>                                                                       | 2R,3R-Trans-aro<br>madendrin                                                    |
| S70 | 7.53 | C <sub>27</sub> H <sub>30</sub> O <sub>15</sub> | 593.1497 | -1.52 | 285.0407[M-H-Gal-Rha] <sup>-</sup> ,<br>267.0315[M-H-Gal-Rha-H <sub>2</sub> O] <sup>-</sup> ,<br>241.0507[M-H-Gal-Rha-CO <sub>2</sub> ] <sup>-</sup> | Kaempferol-3-O-<br>α-L-rhamnosyl(1<br>-6)-β-D-galactosi<br>de isomer            |
| S71 | 7.77 | C <sub>21</sub> H <sub>22</sub> O <sub>11</sub> | 449.1089 | 1.11  | 287.0569[M-H-Glc] <sup>-</sup> ,<br>269.0455[M-H-C <sub>6</sub> H <sub>12</sub> O <sub>6</sub> ] <sup>-</sup> ,<br>259.0633[M-H-Glc-CO] <sup>-</sup> | Aromadendrin<br>7-O-β-D-glucosi<br>de isomer                                    |
| S72 | 7.77 | C <sub>27</sub> H <sub>30</sub> O <sub>15</sub> | 593.1500 | -1.01 | 285.0414[M-H-Gal-Rha] <sup>-</sup> ,<br>267.0316[M-H-Gal-Rha-H <sub>2</sub> O] <sup>-</sup> ,<br>241.0513[M-H-Gal-Rha-CO <sub>2</sub> ] <sup>-</sup> | Kaempferol-3-O-<br>α-L-rhamnosyl(1<br>-6)-β-D-galactosi<br>de isomer            |
| S73 | 8.24 | C <sub>21</sub> H <sub>18</sub> O <sub>13</sub> | 477.0670 | 0.21  | 301.0374[M-H-GluA] <sup>-</sup>                                                                                                                      | Quercetin<br>3-O-β-D-glucuro<br>nide isomer                                     |
| S74 | 8.32 | C <sub>27</sub> H <sub>30</sub> O <sub>16</sub> | 609.1459 | 0.49  | 301.0351[M-H-Glc/Gal-Rha] <sup>-</sup>                                                                                                               | Rutin/Naringenin<br>-3-O-α-L-rhamn<br>osyl(1-6)-β-D-ga<br>lactoside             |
| S75 | 8.45 | C <sub>27</sub> H <sub>30</sub> O <sub>16</sub> | 609.1459 | 0.49  | 301.0355[M-H-Glc/Gal-Rha] <sup>-</sup>                                                                                                               | Rutin/Naringenin<br>-3-O-α-L-rhamn<br>osyl(1-6)-β-D-ga<br>lactoside             |
| S76 | 8.58 | C <sub>21</sub> H <sub>20</sub> O <sub>12</sub> | 463.0880 | 0.65  | 301.0347[M-H-Glc/Gal] <sup>-</sup> ,<br>259.0261[M-H-Glc/Gal-C <sub>2</sub> H <sub>2</sub> O] <sup>-</sup>                                           | Quercetin-3-O-β-<br>D-galactopyrano<br>side<br>/Quercetin-3-O-β<br>-D-glucoside |
| S77 | 8.65 | C <sub>21</sub> H <sub>18</sub> O <sub>13</sub> | 477.0668 | -0.21 | 301.0358[M-H-GluA] <sup>-</sup>                                                                                                                      | Quercetin                                                                       |

|                                   |       |                                                 |          |      |                                                                                                                                                                            |                                                                          |
|-----------------------------------|-------|-------------------------------------------------|----------|------|----------------------------------------------------------------------------------------------------------------------------------------------------------------------------|--------------------------------------------------------------------------|
|                                   |       |                                                 |          |      |                                                                                                                                                                            | 3-O-β-D-glucuronide                                                      |
| S78                               | 8.74  | C <sub>21</sub> H <sub>20</sub> O <sub>12</sub> | 463.0881 | 0.86 | 301.0361[M-H-Glc/Gal] <sup>-</sup>                                                                                                                                         | Quercetin-3-O-β-D-galactopyranoside                                      |
| S79                               | 8.80  | C <sub>21</sub> H <sub>22</sub> O <sub>11</sub> | 449.1090 | 1.34 | 287.0561[M-H-Glc] <sup>-</sup> ,<br>269.0466[M-H-C <sub>6</sub> H <sub>12</sub> O <sub>6</sub> ] <sup>-</sup>                                                              | /Quercetin-3-O-β-D-glucoside<br>Aromadendrin<br>7-O-β-D-glucoside isomer |
| S80                               | 8.92  | C <sub>27</sub> H <sub>30</sub> O <sub>15</sub> | 593.1508 | 0.34 | 285.0410[M-H-Gal-Rha] <sup>-</sup> ,<br>267.0302[M-H-Gal-Rha-H <sub>2</sub> O] <sup>-</sup> ,<br>241.0510[M-H-Gal-Rha-CO <sub>2</sub> ] <sup>-</sup>                       | Kaempferol-3-O-α-L-Rhamnosyl(1-6)-β-D-galactoside                        |
| S81                               | 9.07  | C <sub>20</sub> H <sub>18</sub> O <sub>11</sub> | 433.0775 | 0.92 | 301.0346[M-H-Xyl] <sup>-</sup>                                                                                                                                             | Quercetin<br>3-O-β-D-Xylopyranoside                                      |
| S82                               | 9.25  | C <sub>20</sub> H <sub>18</sub> O <sub>11</sub> | 433.0773 | 0.46 | 301.0346[M-H-Xyl] <sup>-</sup>                                                                                                                                             | Quercetin<br>3-O-β-D-Xylopyranoside isomer                               |
| S83                               | 9.28  | C <sub>27</sub> H <sub>30</sub> O <sub>15</sub> | 593.1506 | 0.00 | 285.0407[M-H-Gal-Rha] <sup>-</sup>                                                                                                                                         | Kaempferol-3-O-α-L-Rhamnosyl(1-6)-β-D-galactoside isomer                 |
| S84                               | 10.18 | C <sub>15</sub> H <sub>12</sub> O <sub>6</sub>  | 287.0560 | 1.39 | 243.0652[M-H-CO <sub>2</sub> ] <sup>-</sup>                                                                                                                                | 2R,3R-Trans-aromadendrin<br>isomer                                       |
| S85                               | 11.66 | C <sub>15</sub> H <sub>12</sub> O <sub>6</sub>  | 287.0561 | 1.74 | 259.0605[M-H-CO] <sup>-</sup>                                                                                                                                              | 2R,3R-Trans-aromadendrin<br>isomer                                       |
| S86                               | 11.82 | C <sub>16</sub> H <sub>14</sub> O <sub>5</sub>  | 285.0767 | 1.40 | 270.0539[M-H-CH <sub>3</sub> ] <sup>-</sup> ,<br>217.0523[M-H-C <sub>3</sub> O <sub>2</sub> ] <sup>-</sup>                                                                 | Naringenin-7-O-methylether                                               |
| S87                               | 14.65 | C <sub>15</sub> H <sub>12</sub> O <sub>5</sub>  | 271.0612 | 2.21 | 229.0507[M-H-C <sub>2</sub> H <sub>2</sub> O] <sup>-</sup> ,<br>227.0726[M-H-CO <sub>2</sub> ] <sup>-</sup> ,<br>203.0862[M-H-C <sub>3</sub> O <sub>2</sub> ] <sup>-</sup> | Naringenin <sup>a</sup>                                                  |
| <hr/>                             |       |                                                 |          |      |                                                                                                                                                                            |                                                                          |
| Flavonoid from <i>Chinese yam</i> |       |                                                 |          |      |                                                                                                                                                                            |                                                                          |
| SY8                               | 19.45 | C <sub>16</sub> H <sub>14</sub> O <sub>4</sub>  | 269.0818 | 1.49 | 254.0583[M-H-CH <sub>3</sub> ] <sup>-</sup> ,<br>239.0348[M-H-OCH <sub>2</sub> ] <sup>-</sup> ,<br>211.0399[M-H-OCH <sub>2</sub> -CO] <sup>-</sup>                         | 3,5-Dimethoxy-2,7-phenanthrediol                                         |

<sup>a</sup>: Compound identified by comparison with the standard reference.

Table S3 Iridoids from ZKYY

| No.                                   | $t_R$<br>(min) | Molecular<br>formula                            | Measured<br>value ( $m/z$ ) | Diff<br>(ppm) | Product ions                                                                                                                                                                                     | Compound name                                          |
|---------------------------------------|----------------|-------------------------------------------------|-----------------------------|---------------|--------------------------------------------------------------------------------------------------------------------------------------------------------------------------------------------------|--------------------------------------------------------|
| Iridoids from <i>Rehmanniae Radix</i> |                |                                                 |                             |               |                                                                                                                                                                                                  |                                                        |
| D1                                    | 1.40           | C <sub>15</sub> H <sub>22</sub> O <sub>10</sub> | 361.1136                    | 0.28          | 199.0604[M-H-Glc] <sup>-</sup> ,<br>169.0508[M-H-Glc-CH <sub>2</sub> O] <sup>-</sup>                                                                                                             | Catalpol <sup>a</sup>                                  |
| D2                                    | 2.03           | C <sub>21</sub> H <sub>32</sub> O <sub>15</sub> | 523.1665                    | 0.38          | 199.0614[M-H-2Glc] <sup>-</sup> ,<br>169.0507[M-H-2Glc-OCH <sub>2</sub> ] <sup>-</sup>                                                                                                           | Rehmannioside<br>A                                     |
| D3                                    | 2.72           | C <sub>15</sub> H <sub>22</sub> O <sub>10</sub> | 361.1137                    | 0.55          | 199.0617[M-H-Glc] <sup>-</sup><br>169.0511[M-H-Glc-CH <sub>2</sub> O] <sup>-</sup>                                                                                                               | Monomelittoside                                        |
| D4                                    | 3.12           | C <sub>27</sub> H <sub>42</sub> O <sub>20</sub> | 685.2192                    | 0.15          | 505.1195[M-H-Glc-H <sub>2</sub> O] <sup>-</sup> ,<br>361.0782[M-H-2Glc] <sup>-</sup> ,<br>343.0674[M-H-2Glc-H <sub>2</sub> O] <sup>-</sup> ,<br>181.0503[M-H-3Glc-H <sub>2</sub> O] <sup>-</sup> | Rehmannioside<br>D                                     |
| D5                                    | 3.17           | C <sub>15</sub> H <sub>24</sub> O <sub>10</sub> | 363.1295                    | 1.10          | 201.0711[M-H-Glc] <sup>-</sup>                                                                                                                                                                   | Dihydrocatalpo<br>isomer                               |
| D6                                    | 3.19           | C <sub>9</sub> H <sub>12</sub> O <sub>3</sub>   | 167.0712                    | 2.39          | 152.0117[M-H-CH <sub>3</sub> ] <sup>-</sup> ,<br>123.0455[M-H-CO <sub>2</sub> ] <sup>-</sup> ,<br>108.0218[M-H-CH <sub>3</sub> -CO <sub>2</sub> ] <sup>-</sup>                                   | 6β-hydroxy-2-ox<br>abicyclo[4.3.0]Δ<br>8-9-nonen-1-one |
| D7                                    | 3.22           | C <sub>16</sub> H <sub>22</sub> O <sub>10</sub> | 373.1140                    | 1.34          | 329.0873[M-H-CO <sub>2</sub> ] <sup>-</sup> ,<br>167.0346[M-H-CO <sub>2</sub> -Glc] <sup>-</sup>                                                                                                 | Gardoside                                              |
| D8                                    | 3.27           | C <sub>21</sub> H <sub>32</sub> O <sub>15</sub> | 523.1666                    | 0.57          | 361.1154[M-H-Glc] <sup>-</sup> ,<br>199.0609[M-H-2Glc] <sup>-</sup>                                                                                                                              | Melittoside                                            |
| D9                                    | 3.30           | C <sub>15</sub> H <sub>22</sub> O <sub>10</sub> | 361.1138                    | 0.83          | 199.0605[M-H-Glc] <sup>-</sup><br>169.0511[M-H-Glc-CH <sub>2</sub> O] <sup>-</sup>                                                                                                               | Catalpol isomer/<br>Monomelittoside<br>isomer          |
| D10                                   | 3.72           | C <sub>15</sub> H <sub>24</sub> O <sub>10</sub> | 363.1295                    | 1.10          | 201.0714[M-H-Glc] <sup>-</sup>                                                                                                                                                                   | Dihydrocatalpo                                         |
| D11                                   | 3.80           | C <sub>16</sub> H <sub>22</sub> O <sub>10</sub> | 373.1138                    | 0.80          | 329.0871[M-H-CO <sub>2</sub> ] <sup>-</sup> ,<br>167.0349[M-H-CO <sub>2</sub> -Glc] <sup>-</sup>                                                                                                 | Geniposidic acid<br><sup>a</sup>                       |
| D12                                   | 3.81           | C <sub>21</sub> H <sub>34</sub> O <sub>14</sub> | 509.1872                    | 0.39          | 185.0494213.0776[M-H-2Glc] <sup>-</sup>                                                                                                                                                          | Rehmannioside<br>C                                     |
| D13                                   | 4.46           | C <sub>15</sub> H <sub>24</sub> O <sub>9</sub>  | 347.1345                    | 0.86          | 167.0468[M-H-Glc-H <sub>2</sub> O] <sup>-</sup>                                                                                                                                                  | Ajugol                                                 |
| D14                                   | 4.47           | C <sub>16</sub> H <sub>24</sub> O <sub>10</sub> | 375.1294                    | 0.80          | 213.0773[M-H-Glc] <sup>-</sup> ,<br>169.0866[M-H-Glc-CO <sub>2</sub> ] <sup>-</sup>                                                                                                              | Mussaenosidic<br>acid                                  |
| D15                                   | 4.84           | C <sub>15</sub> H <sub>22</sub> O <sub>9</sub>  | 345.1189                    | 0.87          | 183.0661[M-H-Glc] <sup>-</sup>                                                                                                                                                                   | Aucubin                                                |
| D16                                   | 5.17           | C <sub>16</sub> H <sub>24</sub> O <sub>10</sub> | 375.1291                    | 0.00          | 213.0776[M-H-Glc] <sup>-</sup> ,<br>169.0872[M-H-Glc-CO <sub>2</sub> ] <sup>-</sup>                                                                                                              | 8-Epiloganic<br>acid <sup>a</sup>                      |
| D17                                   | 5.45           | C <sub>17</sub> H <sub>26</sub> O <sub>10</sub> | 389.1450                    | 0.51          | 227.0942[M-H-Glc] <sup>-</sup> ,<br>169.0143[M-H-Glc-OCOCH <sub>2</sub> ] <sup>-</sup>                                                                                                           | Ajugoside                                              |
| D18                                   | 6.03           | C <sub>23</sub> H <sub>34</sub> O <sub>15</sub> | 549.1824                    | 0.91          | 387.1440[M-H-Glc] <sup>-</sup> ,<br>225.0766[M-H-2Glc] <sup>-</sup>                                                                                                                              | Genipin<br>1-gentiobioside <sup>a</sup>                |
| D19                                   | 6.73           | C <sub>18</sub> H <sub>26</sub> O <sub>10</sub> | 401.1451                    | 0.75          | 167.0716[M-H-Glc-Ac-OCH <sub>2</sub> ] <sup>-</sup>                                                                                                                                              | Acetylcatalpol                                         |
| D20                                   | 6.93           | C <sub>17</sub> H <sub>24</sub> O <sub>10</sub> | 387.1296                    | 1.29          | 225.0782[M-H-Glc] <sup>-</sup> ,<br>181.0503[M-H-Glc-CO <sub>2</sub> ] <sup>-</sup>                                                                                                              | Geniposide <sup>a</sup>                                |



|     |       |                                                 |          |      |                                                                                                                                                                                                                                                                                            |                                            |
|-----|-------|-------------------------------------------------|----------|------|--------------------------------------------------------------------------------------------------------------------------------------------------------------------------------------------------------------------------------------------------------------------------------------------|--------------------------------------------|
| D21 | 6.94  | C <sub>31</sub> H <sub>48</sub> O <sub>18</sub> | 707.2766 | 0.57 | 163.0401[M-H-Glc-CO <sub>2</sub> -H <sub>2</sub> O] <sup>-</sup><br>545.1743[M-H-Glc] <sup>-</sup> ,<br>383.1188[M-H-2Glc] <sup>-</sup>                                                                                                                                                    | Frehmaglutoside<br>G/Frehmaglutosi<br>de G |
| D22 | 6.96  | C <sub>17</sub> H <sub>26</sub> O <sub>10</sub> | 389.1449 | 0.26 | 227.0930[M-H-Glc] <sup>-</sup> ,<br>169.0142[M-H-Glc-OCOCH <sub>2</sub> ] <sup>-</sup>                                                                                                                                                                                                     | 3,4-Dihydroverb<br>enalin                  |
| D23 | 6.97  | C <sub>16</sub> H <sub>26</sub> O <sub>8</sub>  | 345.1553 | 1.16 | 139.1123[M-H-CO <sub>2</sub> -Glc] <sup>-</sup>                                                                                                                                                                                                                                            | 5-Deoxylamiol                              |
| D24 | 8.66  | C <sub>25</sub> H <sub>32</sub> O <sub>12</sub> | 523.1818 | 0.38 | 361.1681[M-H-Glc] <sup>-</sup> ,<br>330.1437[M-H-C <sub>10</sub> H <sub>9</sub> O <sub>4</sub> ] <sup>-</sup> ,<br>193.0508[C <sub>10</sub> H <sub>10</sub> O <sub>4</sub> -H] <sup>-</sup> ,<br>175.0405[C <sub>10</sub> H <sub>10</sub> O <sub>4</sub> -H-H <sub>2</sub> O] <sup>-</sup> | 6-O-Feruloylajug<br>ol isomer              |
| D25 | 8.69  | C <sub>24</sub> H <sub>30</sub> O <sub>13</sub> | 525.1613 | 0.95 | 201.0719[M-H-C <sub>9</sub> H <sub>6</sub> O <sub>3</sub> -Glc] <sup>-</sup>                                                                                                                                                                                                               | 6-O-E-caffeoyl<br>ajugol isomer            |
| D26 | 9.28  | C <sub>22</sub> H <sub>28</sub> O <sub>11</sub> | 467.1558 | 1.07 | 287.0901[M-H-Glc-H <sub>2</sub> O] <sup>-</sup> ,<br>137.0246[C <sub>7</sub> H <sub>6</sub> O <sub>3</sub> -H] <sup>-</sup>                                                                                                                                                                | 6-O-p-hydroxybe<br>nzoate ajugol           |
| D27 | 9.30  | C <sub>24</sub> H <sub>30</sub> O <sub>13</sub> | 525.1613 | 0.95 | 201.0703[M-H-C <sub>9</sub> H <sub>6</sub> O <sub>3</sub> -Glc] <sup>-</sup>                                                                                                                                                                                                               | 6-O-E-caffeoyl<br>ajugol isomer            |
| D28 | 9.61  | C <sub>25</sub> H <sub>32</sub> O <sub>12</sub> | 523.1821 | 0.96 | 361.1662[M-H-Glc] <sup>-</sup> ,<br>193.0509[C <sub>10</sub> H <sub>10</sub> O <sub>4</sub> -H] <sup>-</sup> ,<br>175.0401[C <sub>10</sub> H <sub>10</sub> O <sub>4</sub> -H-H <sub>2</sub> O] <sup>-</sup>                                                                                | 6-O-Feruloylajug<br>ol isomer              |
| D29 | 11.10 | C <sub>24</sub> H <sub>30</sub> O <sub>10</sub> | 477.1765 | 0.84 | 315.0876[M-H-Glc] <sup>-</sup>                                                                                                                                                                                                                                                             | Rehmaglutoside<br>A                        |
| D30 | 11.17 | C <sub>25</sub> H <sub>32</sub> O <sub>12</sub> | 523.1816 | 0.00 | 193.0508[C <sub>10</sub> H <sub>10</sub> O <sub>4</sub> -H] <sup>-</sup> ,<br>175.0765[C <sub>10</sub> H <sub>10</sub> O <sub>4</sub> -H-H <sub>2</sub> O] <sup>-</sup>                                                                                                                    | 6-O-Z-Feruloylaj<br>ugol                   |
| D31 | 11.72 | C <sub>24</sub> H <sub>30</sub> O <sub>13</sub> | 525.1613 | 0.95 | 201.0713[M-H-C <sub>9</sub> H <sub>6</sub> O <sub>3</sub> -Glc] <sup>-</sup>                                                                                                                                                                                                               | 6-O-E-caffeoyl<br>ajugol                   |
| D32 | 14.22 | C <sub>25</sub> H <sub>32</sub> O <sub>12</sub> | 523.1819 | 0.57 | 193.0507[C <sub>10</sub> H <sub>10</sub> O <sub>4</sub> -H] <sup>-</sup> ,<br>175.0401[C <sub>10</sub> H <sub>10</sub> O <sub>4</sub> -H-H <sub>2</sub> O] <sup>-</sup>                                                                                                                    | 6-O-E-Feruloylaj<br>ugol                   |

#### Iridoids from *Corni officinalis*

|    |      |                                                 |          |       |                                                                                                                                                                                                                                              |                                 |
|----|------|-------------------------------------------------|----------|-------|----------------------------------------------------------------------------------------------------------------------------------------------------------------------------------------------------------------------------------------------|---------------------------------|
| S1 | 2.26 | C <sub>16</sub> H <sub>22</sub> O <sub>9</sub>  | 357.1188 | 0.56  | 195.0679[M-H-Glc] <sup>-</sup> ,<br>177.0551[M-H-Glc-H <sub>2</sub> O] <sup>-</sup>                                                                                                                                                          | Sweroside<br>isomer             |
| S2 | 3.22 | C <sub>16</sub> H <sub>22</sub> O <sub>10</sub> | 373.1138 | 0.80  | 211.0613[M-H-Glc] <sup>-</sup> ,<br>167.0346[M-H-Glc-CO <sub>2</sub> ] <sup>-</sup>                                                                                                                                                          | Secoxyloganin<br>isomer         |
| S3 | 4.11 | C <sub>16</sub> H <sub>22</sub> O <sub>10</sub> | 373.1137 | 0.54  | 211.0613[M-H-Glc] <sup>-</sup> ,<br>167.0350[M-H-Glc-CO <sub>2</sub> ] <sup>-</sup>                                                                                                                                                          | Secoxyloganin                   |
| S4 | 4.36 | C <sub>16</sub> H <sub>22</sub> O <sub>11</sub> | 389.1088 | 1.03  | 345.1205[M-H-CO <sub>2</sub> ] <sup>-</sup> ,<br>301.1531[M-H-2CO <sub>2</sub> ] <sup>-</sup> ,<br>227.1404[M-H-Glc] <sup>-</sup> ,<br>183.0665[M-H-Glc-CO <sub>2</sub> ] <sup>-</sup> ,<br>139.0402[M-H-2CO <sub>2</sub> -Glc] <sup>-</sup> | Secologanoside<br>isomer        |
| S5 | 4.37 | C <sub>23</sub> H <sub>36</sub> O <sub>16</sub> | 567.1924 | -0.18 | 405.1412[M-H-Glc] <sup>-</sup> ,<br>243.0877[M-H-2Glc] <sup>-</sup>                                                                                                                                                                          | cornusglucoside<br>D/E/G/isomer |
| S6 | 4.65 | C <sub>17</sub> H <sub>26</sub> O <sub>11</sub> | 405.1400 | 0.74  | 243.0871[M-H-Glc] <sup>-</sup>                                                                                                                                                                                                               | Morrnionide                     |

|     |      |                                                 |          |       |                                                                                                                                                                                                               |                                                    |
|-----|------|-------------------------------------------------|----------|-------|---------------------------------------------------------------------------------------------------------------------------------------------------------------------------------------------------------------|----------------------------------------------------|
| S7  | 4.71 | C <sub>23</sub> H <sub>36</sub> O <sub>16</sub> | 567.1924 | -0.18 | 405.1410[M-H-Glc] <sup>-</sup> ,<br>243.0878[M-H-2Glc] <sup>-</sup>                                                                                                                                           | isomer<br>cornusglucoside<br>D/E/G/isomer          |
| S8  | 4.81 | C <sub>16</sub> H <sub>24</sub> O <sub>10</sub> | 375.1292 | 0.27  | 213.0775[M-H-Glc] <sup>-</sup> ,<br>169.0874[M-H-Glc-CO <sub>2</sub> ] <sup>-</sup> ,<br>151.0770[M-H-Glc-CO <sub>2</sub> -H <sub>2</sub> O] <sup>-</sup>                                                     | Loganic acid <sup>a</sup>                          |
| S9  | 4.86 | C <sub>16</sub> H <sub>22</sub> O <sub>9</sub>  | 357.1189 | 0.84  | 195.0681[M-H-Glc] <sup>-</sup> ,<br>177.0569[M-H-Glc-H <sub>2</sub> O] <sup>-</sup>                                                                                                                           | Sweroside<br>isomer                                |
| S10 | 4.86 | C <sub>23</sub> H <sub>36</sub> O <sub>16</sub> | 567.1925 | 0.00  | 243.0878[M-H-2Glc] <sup>-</sup>                                                                                                                                                                               | cornusglucoside<br>D/E/G/isomer                    |
| S11 | 5.01 | C <sub>23</sub> H <sub>36</sub> O <sub>16</sub> | 567.1924 | -0.18 | 405.1410[M-H-Glc] <sup>-</sup> ,<br>243.0880[M-H-2Glc] <sup>-</sup>                                                                                                                                           | cornusglucoside<br>D/E/G/isomer                    |
| S12 | 5.10 | C <sub>23</sub> H <sub>36</sub> O <sub>16</sub> | 567.1923 | -0.35 | 405.1394[M-H-Glc] <sup>-</sup> ,<br>243.0880[M-H-2Glc] <sup>-</sup>                                                                                                                                           | cornusglucoside<br>cornusglucoside<br>D/E/G/isomer |
| S13 | 5.25 | C <sub>23</sub> H <sub>36</sub> O <sub>16</sub> | 567.1927 | 0.35  | 405.1410[M-H-Glc] <sup>-</sup> ,<br>243.0872[M-H-2Glc] <sup>-</sup>                                                                                                                                           | cornusglucoside<br>D/E/G/isomer                    |
| S14 | 5.38 | C <sub>17</sub> H <sub>26</sub> O <sub>10</sub> | 389.1450 | 0.51  | 227.0928[M-H-Glc] <sup>-</sup> ,<br>209.0821[M-H-C <sub>6</sub> H <sub>12</sub> O <sub>6</sub> ] <sup>-</sup>                                                                                                 | β-dihydrocornin                                    |
| S15 | 5.43 | C <sub>23</sub> H <sub>36</sub> O <sub>16</sub> | 567.1927 | 0.35  | 405.1416[M-H-Glc] <sup>-</sup> ,<br>243.0885[M-H-2Glc] <sup>-</sup>                                                                                                                                           | cornusglucoside<br>D/E/G/isomer                    |
| S16 | 5.56 | C <sub>17</sub> H <sub>26</sub> O <sub>11</sub> | 405.1398 | 0.25  | 243.0885[M-H-Glc] <sup>-</sup> ,<br>225.0701[M-H-C <sub>6</sub> H <sub>12</sub> O <sub>6</sub> ] <sup>-</sup> ,<br>181.0489[M-H-C <sub>6</sub> H <sub>12</sub> O <sub>6</sub> -CO <sub>2</sub> ] <sup>-</sup> | Morrionside <sup>a</sup>                           |
| S17 | 5.82 | C <sub>16</sub> H <sub>24</sub> O <sub>10</sub> | 375.1293 | 0.53  | 213.0771[M-H-Glc] <sup>-</sup> ,<br>169.0871[M-H-Glc-CO <sub>2</sub> ] <sup>-</sup> ,<br>151.0765[M-H-Glc-CO <sub>2</sub> -H <sub>2</sub> O] <sup>-</sup>                                                     | Loganic acid<br>isomer                             |
| S18 | 5.91 | C <sub>16</sub> H <sub>22</sub> O <sub>11</sub> | 389.1087 | 0.77  | 345.1190[M-H-CO <sub>2</sub> ] <sup>-</sup> ,<br>227.1403[M-H-Glc] <sup>-</sup> ,<br>183.0663[M-H-Glc-CO <sub>2</sub> ] <sup>-</sup> ,<br>139.0770[M-H-2CO <sub>2</sub> -Glc] <sup>-</sup>                    | Secologanoside                                     |
| S19 | 5.94 | C <sub>18</sub> H <sub>28</sub> O <sub>11</sub> | 419.1557 | 0.95  | 239.0653[M-H-C <sub>6</sub> H <sub>12</sub> O <sub>6</sub> ] <sup>-</sup>                                                                                                                                     | 7R-O-methylmor<br>roniside                         |
| S20 | 6.15 | C <sub>17</sub> H <sub>24</sub> O <sub>10</sub> | 387.1291 | 0.00  | 225.0739[M-H-Glc] <sup>-</sup> ,<br>165.0513[M-H-Glc-COOCH <sub>3</sub> ] <sup>-</sup>                                                                                                                        | Cornine isomer                                     |
| S21 | 6.38 | C <sub>17</sub> H <sub>24</sub> O <sub>10</sub> | 387.1295 | 1.03  | 225.0768[M-H-Glc] <sup>-</sup> ,<br>165.0558[M-H-Glc-COOCH <sub>3</sub> ] <sup>-</sup>                                                                                                                        | Cornine isomer                                     |
| S22 | 6.50 | C <sub>21</sub> H <sub>30</sub> O <sub>14</sub> | 505.1561 | 0.79  | 459.1069[M-H-HCOOH] <sup>-</sup> ,<br>429.0970[M-H-HCOOH-OCH <sub>2</sub> ] <sup>-</sup> ,<br>399.0876[M-H-HCOOH-2OCH <sub>2</sub> ] <sup>-</sup> ,<br>371.0912[M-H-HCOOH-2OCH <sub>2</sub> -CO] <sup>-</sup> | Logmalicid A<br>isomer/Logmalic<br>id B isomer     |
| S23 | 6.72 | C <sub>18</sub> H <sub>28</sub> O <sub>11</sub> | 419.1556 | 0.72  | 257.0820[M-H-Glc] <sup>-</sup> ,<br>239.0720[M-H-C <sub>6</sub> H <sub>12</sub> O <sub>6</sub> ] <sup>-</sup>                                                                                                 | 7S-O-methylmor<br>roniside                         |
| S24 | 6.81 | C <sub>17</sub> H <sub>24</sub> O <sub>10</sub> | 387.1292 | 0.26  | 225.0780[M-H-Glc] <sup>-</sup>                                                                                                                                                                                | Cornine <sup>a</sup>                               |

|     |      |                                                 |          |       |                                                                                                                                                                                                                                              |                                                |
|-----|------|-------------------------------------------------|----------|-------|----------------------------------------------------------------------------------------------------------------------------------------------------------------------------------------------------------------------------------------------|------------------------------------------------|
|     |      |                                                 |          |       | 165.0530[M-H-Glc-COOCH <sub>3</sub> ] <sup>-</sup>                                                                                                                                                                                           |                                                |
| S25 | 6.83 | C <sub>11</sub> H <sub>14</sub> O <sub>5</sub>  | 225.0767 | 1.78  | 195.0652[M-H-OCH <sub>2</sub> ] <sup>-</sup> ,<br>181.0772[M-H-CO <sub>2</sub> ] <sup>-</sup>                                                                                                                                                | Dehydromorrone<br>side aglycone                |
| S26 | 6.85 | C <sub>17</sub> H <sub>26</sub> O <sub>10</sub> | 389.1453 | 1.28  | 227.0941[M-H-Glc] <sup>-</sup> ,<br>209.0812[M-H -C <sub>6</sub> H <sub>12</sub> O <sub>6</sub> ] <sup>-</sup>                                                                                                                               | Loganin                                        |
| S27 | 7.01 | C <sub>16</sub> H <sub>22</sub> O <sub>9</sub>  | 357.1188 | 0.56  | 195.0663[M-H-Glc] <sup>-</sup> ,<br>177.0559[M-H-Glc-H <sub>2</sub> O] <sup>-</sup>                                                                                                                                                          | Sweroside <sup>a</sup>                         |
| S28 | 7.42 | C <sub>17</sub> H <sub>26</sub> O <sub>10</sub> | 389.1451 | 0.77  | 227.0919[M-H-Glc] <sup>-</sup> ,<br>209.0822[M-H -C <sub>6</sub> H <sub>12</sub> O <sub>6</sub> ] <sup>-</sup>                                                                                                                               | Loganin isomer                                 |
| S29 | 7.42 | C <sub>21</sub> H <sub>30</sub> O <sub>14</sub> | 505.1557 | 0.00  | 487.1445[M-H-H <sub>2</sub> O] <sup>-</sup> ,<br>389.1441[M-H-HCOOH-HCOOCH <sub>3</sub> ] <sup>-</sup> ,<br>227.0928[M-H-HCOOH-HCOOCH <sub>3</sub> -Glc] <sup>-</sup><br>209.0825[M-H-HCOOH-HCOOCH <sub>3</sub> -Glc-H<br>2O] <sup>-</sup>   | Logmalicid A<br>isomer/Logmalic<br>id B isomer |
| S30 | 7.50 | C <sub>21</sub> H <sub>30</sub> O <sub>14</sub> | 505.1556 | -0.20 | 487.1473[M-H-H <sub>2</sub> O] <sup>-</sup> ,<br>389.1416[M-H-HCOOH-HCOOCH <sub>3</sub> ] <sup>-</sup> ,<br>227.0927[M-H-HCOOH-HCOOCH <sub>3</sub> -Glc] <sup>-</sup><br>209.0804[M-H-HCOOH-HCOOCH <sub>3</sub> -Glc-H<br>2O] <sup>-</sup>   | Logmalicid<br>A/Logmalicid B                   |
| S31 | 7.73 | C <sub>21</sub> H <sub>30</sub> O <sub>14</sub> | 505.1561 | 0.79  | 487.1473[M-H-H <sub>2</sub> O] <sup>-</sup> ,<br>389.1416[M-H-HCOOH-HCOOCH <sub>3</sub> ] <sup>-</sup> ,<br>227.0927[M-H-HCOOH-HCOOCH <sub>3</sub> -Glc] <sup>-</sup> ,<br>209.0818[M-H-HCOOH-HCOOCH <sub>3</sub> -Glc-H<br>2O] <sup>-</sup> | Logmalicid A<br>isomer/Logmalic<br>id B isomer |
| S32 | 7.73 | C <sub>17</sub> H <sub>24</sub> O <sub>11</sub> | 403.1242 | 0.25  | 241.1088[M-H-Glc] <sup>-</sup> ,<br>197.1183[M-H-Glc-CO <sub>2</sub> ] <sup>-</sup>                                                                                                                                                          | Kingiside/8-epi<br>kingiside                   |
| S33 | 7.86 | C <sub>21</sub> H <sub>30</sub> O <sub>14</sub> | 505.1557 | 0.00  | 487.1474[M-H-H <sub>2</sub> O] <sup>-</sup> ,<br>227.0930[M-H-HCOOH-HCOOCH <sub>3</sub> -Glc] <sup>-</sup> ,<br>209.0832[M-H-HCOOH-HCOOCH <sub>3</sub> -Glc-H<br>2O] <sup>-</sup>                                                            | Logmalicid<br>A/Logmalicid B                   |
| S34 | 7.91 | C <sub>17</sub> H <sub>26</sub> O <sub>10</sub> | 389.1452 | 1.03  | 227.0950[M-H-Glc] <sup>-</sup>                                                                                                                                                                                                               | Loganin isomer                                 |
| S35 | 8.11 | C <sub>21</sub> H <sub>30</sub> O <sub>14</sub> | 505.1562 | 0.99  | 227.0927[M-H-HCOOH-HCOOCH <sub>3</sub> -Glc] <sup>-</sup> ,<br>209.0833[M-H-HCOOH-HCOOCH <sub>3</sub> -Glc-H<br>2O] <sup>-</sup>                                                                                                             | Logmalicid A<br>isomer/Logmalic<br>id B isomer |
| S36 | 8.96 | C <sub>17</sub> H <sub>26</sub> O <sub>11</sub> | 433.1714 | 0.92  | 271.0627[M-H-Glc] <sup>-</sup> ,<br>253.0869[M-H-C <sub>6</sub> H <sub>12</sub> O <sub>6</sub> ] <sup>-</sup> ,<br>225.0770[M-H-C <sub>6</sub> H <sub>12</sub> O <sub>6</sub> -CO] <sup>-</sup>                                              | 7-O-ethylmorrone<br>iside                      |
| S37 | 9.61 | C <sub>16</sub> H <sub>22</sub> O <sub>9</sub>  | 357.1188 | 0.56  | 195.0664[M-H-Glc] <sup>-</sup> ,<br>177.0567[M-H-Glc-H <sub>2</sub> O] <sup>-</sup>                                                                                                                                                          | Sweroside<br>isomer                            |
| S38 | 9.61 | C <sub>21</sub> H <sub>24</sub> O <sub>7</sub>  | 387.1447 | 0.77  | 372.1206[M-H-CH <sub>3</sub> ] <sup>-</sup> ,<br>357.0978[M-H-2CH <sub>3</sub> ] <sup>-</sup> ,<br>341.1096[M-H-CH <sub>3</sub> -OCH <sub>3</sub> ] <sup>-</sup>                                                                             | (-)-medioresinol                               |
| S39 | 9.66 | C <sub>20</sub> H <sub>22</sub> O <sub>6</sub>  | 357.1337 | -0.28 | 342.1125[M-H-CH <sub>3</sub> ] <sup>-</sup> ,<br>311.0929[M-H-CH <sub>3</sub> -OCH <sub>3</sub> ] <sup>-</sup>                                                                                                                               | (+)-pinioresinol/(<br>+)-epipinioresinol       |

|     |       |                                                 |          |       |                                                                                                                                                                                                                |                                        |
|-----|-------|-------------------------------------------------|----------|-------|----------------------------------------------------------------------------------------------------------------------------------------------------------------------------------------------------------------|----------------------------------------|
| S40 | 10.04 | C <sub>24</sub> H <sub>30</sub> O <sub>9</sub>  | 461.1816 | 0.87  | 446.1563[M-H-CH <sub>3</sub> ] <sup>-</sup>                                                                                                                                                                    | Luzonoid B                             |
| S41 | 10.18 | C <sub>34</sub> H <sub>50</sub> O <sub>20</sub> | 777.2823 | 0.77  | 615.2268[M-H-Glc] <sup>-</sup>                                                                                                                                                                                 | CornusideII                            |
| S42 | 10.32 | C <sub>24</sub> H <sub>30</sub> O <sub>14</sub> | 541.1556 | -0.18 | 379.1035[M-H-Glc] <sup>-</sup> ,<br>361.0935[M-H-C <sub>6</sub> H <sub>12</sub> O <sub>6</sub> ] <sup>-</sup> ,<br>331.0670[M-H-C <sub>6</sub> H <sub>12</sub> O <sub>6</sub> -OCH <sub>2</sub> ] <sup>-</sup> | Cornuside I <sup>a</sup>               |
| S43 | 10.65 | C <sub>20</sub> H <sub>22</sub> O <sub>7</sub>  | 373.1292 | 1.34  | 358.1072[M-H-CH <sub>3</sub> ] <sup>-</sup>                                                                                                                                                                    | Cornifins A                            |
| S44 | 10.89 | C <sub>20</sub> H <sub>20</sub> O <sub>8</sub>  | 387.1081 | 0.26  | 341.1096[M-H-CH <sub>3</sub> -OCH <sub>3</sub> ] <sup>-</sup> ,<br>313.1083[M-H-CH <sub>3</sub> -OCH <sub>3</sub> -CO] <sup>-</sup>                                                                            | 3,4,3',4'-tetrahydr<br>oxy-δ-truxinate |

*a*: Compound identified by comparison with the standard reference.

Table S4 Phenylethanoid glycosides from ZKYY

| No. | <i>t<sub>R</sub></i><br>(min) | Molecular<br>formula                            | Measured<br>value ( <i>m/z</i> ) | Diff<br>(ppm) | Product ions                                                                                                                                                                                                                                                                                                                                                                                                                                                                                                               | Compound name                           |
|-----|-------------------------------|-------------------------------------------------|----------------------------------|---------------|----------------------------------------------------------------------------------------------------------------------------------------------------------------------------------------------------------------------------------------------------------------------------------------------------------------------------------------------------------------------------------------------------------------------------------------------------------------------------------------------------------------------------|-----------------------------------------|
| D42 | 4.65                          | C <sub>20</sub> H <sub>30</sub> O <sub>12</sub> | 461.1660                         | 0.22          | 315.1091[M-H-Rha] <sup>-</sup> ,<br>297.0990[M-H-Rha-H <sub>2</sub> O] <sup>-</sup> ,<br>153.0558[M-H-Rha-Glc] <sup>-</sup>                                                                                                                                                                                                                                                                                                                                                                                                | Decaffeoylacteos<br>ide                 |
| D43 | 4.94                          | C <sub>21</sub> H <sub>28</sub> O <sub>13</sub> | 487.1456                         | 0.82          | 179.0353[M-H-Rha-Glc] <sup>-</sup> ,<br>161.0247[C <sub>9</sub> H <sub>6</sub> O <sub>3</sub> -H] <sup>-</sup>                                                                                                                                                                                                                                                                                                                                                                                                             | Cistanoside F                           |
| D44 | 6.56                          | C <sub>21</sub> H <sub>32</sub> O <sub>12</sub> | 475.1818                         | 0.42          | 329.1248[M-H-Rha] <sup>-</sup> ,<br>311.1118[M-H-Rha-H <sub>2</sub> O] <sup>-</sup> ,<br>167.0715[M-H-Rha-Glc] <sup>-</sup>                                                                                                                                                                                                                                                                                                                                                                                                | Darendoside<br>B/Deacyl-martyn<br>oside |
| D45 | 7.66                          | C <sub>35</sub> H <sub>46</sub> O <sub>20</sub> | 785.2508                         | 0.51          | 623.2194[M-H-C <sub>9</sub> H <sub>6</sub> O <sub>3</sub> ] <sup>-</sup> ,<br>605.2052[M-H-C <sub>9</sub> H <sub>6</sub> O <sub>3</sub> -H <sub>2</sub> O] <sup>-</sup> ,<br>477.1617[M-H-C <sub>9</sub> H <sub>6</sub> O <sub>3</sub> -Rha] <sup>-</sup> ,<br>461.1667[M-H-C <sub>9</sub> H <sub>6</sub> O <sub>3</sub> -Glc] <sup>-</sup> ,<br>443.1577[M-H-C <sub>9</sub> H <sub>6</sub> O <sub>3</sub> -Glc-H <sub>2</sub> O] <sup>-</sup> ,<br>161.0244[C <sub>9</sub> H <sub>6</sub> O <sub>3</sub> -H] <sup>-</sup> | Purpureaside C                          |
| D46 | 8.06                          | C <sub>35</sub> H <sub>46</sub> O <sub>19</sub> | 769.2556                         | 0.13          | 623.2177[M-H-Rha] <sup>-</sup> ,<br>605.2121[M-H-Rha-H <sub>2</sub> O] <sup>-</sup> ,<br>461.1709[M-H-Rha-Glc] <sup>-</sup>                                                                                                                                                                                                                                                                                                                                                                                                | Jionoside E                             |
| D47 | 8.54                          | C <sub>36</sub> H <sub>48</sub> O <sub>20</sub> | 799.2662                         | 0.13          | 637.2330[M-H-Glc] <sup>-</sup> ,<br>623.2192[M-H-C <sub>10</sub> H <sub>8</sub> O <sub>3</sub> ] <sup>-</sup> ,<br>605.2079[M-H-C <sub>10</sub> H <sub>8</sub> O <sub>3</sub> -H <sub>2</sub> O] <sup>-</sup> ,<br>477.1617[M-H-C <sub>10</sub> H <sub>8</sub> O <sub>3</sub> -Rha] <sup>-</sup> ,<br>175.0401[C <sub>10</sub> H <sub>8</sub> O <sub>3</sub> -H] <sup>-</sup>                                                                                                                                              | Jionoside<br>A1/Jionoside A2            |
| D48 | 8.68                          | C <sub>35</sub> H <sub>46</sub> O <sub>20</sub> | 785.2508                         | 0.51          | 623.2120[M-H-C <sub>9</sub> H <sub>6</sub> O <sub>3</sub> ] <sup>-</sup> ,<br>477.1508[M-H-C <sub>9</sub> H <sub>6</sub> O <sub>3</sub> -Rha] <sup>-</sup> ,<br>461.1667[M-H-C <sub>9</sub> H <sub>6</sub> O <sub>3</sub> -Glc] <sup>-</sup> ,<br>443.1560[M-H-C <sub>9</sub> H <sub>6</sub> O <sub>3</sub> -Glc-H <sub>2</sub> O] <sup>-</sup> ,<br>161.0245[C <sub>9</sub> H <sub>6</sub> O <sub>3</sub> -H] <sup>-</sup>                                                                                                | Dihoside B                              |
| D49 | 9.11                          | C <sub>29</sub> H <sub>36</sub> O <sub>15</sub> | 623.1969                         | -1.12         | 461.1664[M-H-C <sub>9</sub> H <sub>6</sub> O <sub>3</sub> ] <sup>-</sup> ,<br>315.1078[M-H-C <sub>9</sub> H <sub>6</sub> O <sub>3</sub> -Rha] <sup>-</sup>                                                                                                                                                                                                                                                                                                                                                                 | Verbascoside                            |

|     |       |                                                 |          |       |                                                                                                                                                                                                                                           |                                                      |
|-----|-------|-------------------------------------------------|----------|-------|-------------------------------------------------------------------------------------------------------------------------------------------------------------------------------------------------------------------------------------------|------------------------------------------------------|
| D50 | 9.33  | C <sub>37</sub> H <sub>50</sub> O <sub>20</sub> | 813.2819 | 0.25  | 161.0245[C <sub>9</sub> H <sub>6</sub> O <sub>3</sub> -H] <sup>-</sup> ,<br>491.1700[M-H-C <sub>10</sub> H <sub>8</sub> O <sub>3</sub> -Rha] <sup>-</sup> ,<br>175.0401[C <sub>10</sub> H <sub>8</sub> O <sub>3</sub> -H] <sup>-</sup>    | Jionoside<br>B1/Jionoside B2                         |
| D51 | 9.63  | C <sub>29</sub> H <sub>36</sub> O <sub>15</sub> | 623.1971 | -0.80 | 461.1627[M-H-C <sub>9</sub> H <sub>6</sub> O <sub>3</sub> ] <sup>-</sup> ,<br>161.0244[C <sub>9</sub> H <sub>6</sub> O <sub>3</sub> -H] <sup>-</sup>                                                                                      | Isoverbascoside                                      |
| D52 | 10.34 | C <sub>30</sub> H <sub>38</sub> O <sub>15</sub> | 637.2136 | 0.74  | 475.1461[M-H-C <sub>9</sub> H <sub>6</sub> O <sub>3</sub> ] <sup>-</sup> ,<br>329.0859[M-H-C <sub>9</sub> H <sub>6</sub> O <sub>3</sub> -Rha] <sup>-</sup>                                                                                | Leucosceptoside<br>A                                 |
| D53 | 10.77 | C <sub>30</sub> H <sub>38</sub> O <sub>15</sub> | 637.2135 | 0.56  | 461.1648[M-H-C <sub>10</sub> H <sub>8</sub> O <sub>3</sub> ] <sup>-</sup> ,<br>315.1106[M-H-C <sub>10</sub> H <sub>8</sub> O <sub>3</sub> -Rha] <sup>-</sup>                                                                              | Jionoside D                                          |
| D54 | 11.26 | C <sub>30</sub> H <sub>38</sub> O <sub>15</sub> | 637.2139 | 1.30  | 461.1663[M-H-C <sub>10</sub> H <sub>8</sub> O <sub>3</sub> ] <sup>-</sup> ,<br>315.1101[M-H-C <sub>10</sub> H <sub>8</sub> O <sub>3</sub> -Rha] <sup>-</sup>                                                                              | Leucosceptoside<br>A<br>isomer/Jionoside<br>D isomer |
| D55 | 12.21 | C <sub>31</sub> H <sub>40</sub> O <sub>15</sub> | 651.2289 | 0.00  | 475.1840[M-H-C <sub>10</sub> H <sub>8</sub> O <sub>3</sub> ] <sup>-</sup> ,<br>329.1229[M-H-C <sub>10</sub> H <sub>8</sub> O <sub>3</sub> -Rha] <sup>-</sup> ,<br>175.0407[C <sub>10</sub> H <sub>8</sub> O <sub>3</sub> -H] <sup>-</sup> | Martynoside                                          |
| D56 | 13.07 | C <sub>31</sub> H <sub>40</sub> O <sub>15</sub> | 651.2291 | 0.31  | 475.1826[M-H-C <sub>10</sub> H <sub>8</sub> O <sub>3</sub> ] <sup>-</sup> ,<br>329.1237[M-H-C <sub>10</sub> H <sub>8</sub> O <sub>3</sub> -Rha] <sup>-</sup> ,<br>175.0402[C <sub>10</sub> H <sub>8</sub> O <sub>3</sub> -H] <sup>-</sup> | Martynoside<br>isomer                                |
| D57 | 13.46 | C <sub>29</sub> H <sub>36</sub> O <sub>13</sub> | 591.2080 | 0.34  | 283.0615[M-H-C <sub>9</sub> H <sub>6</sub> O <sub>3</sub> -Rha] <sup>-</sup> ,<br>145.0298[C <sub>6</sub> H <sub>12</sub> O <sub>5</sub> -H] <sup>-</sup>                                                                                 | Jionoside C                                          |

Table S5 Phenylpropanoids from ZKYY

| No. | <i>t<sub>R</sub></i><br>(min) | Molecular<br>formula                            | Measured<br>value ( <i>m/z</i> ) | Diff<br>(ppm) | Product ions                                                                                                                                                                                                                     | Compound name                                                                        |
|-----|-------------------------------|-------------------------------------------------|----------------------------------|---------------|----------------------------------------------------------------------------------------------------------------------------------------------------------------------------------------------------------------------------------|--------------------------------------------------------------------------------------|
| S45 | 4.15                          | C <sub>9</sub> H <sub>8</sub> O <sub>4</sub>    | 179.0345                         | 0.56          | 135.0453[M-H-CO <sub>2</sub> ] <sup>-</sup>                                                                                                                                                                                      | Caffeic acid isomer                                                                  |
| S46 | 4.53                          | C <sub>9</sub> H <sub>8</sub> O <sub>3</sub>    | 163.0396                         | 0.61          | 119.0504[M-H-CO <sub>2</sub> ] <sup>-</sup>                                                                                                                                                                                      | <i>p</i> -Hydroxycinnamic<br>acid isomer                                             |
| S47 | 5.27                          | C <sub>9</sub> H <sub>8</sub> O <sub>3</sub>    | 163.0396                         | 0.61          | 119.0504[M-H-CO <sub>2</sub> ] <sup>-</sup>                                                                                                                                                                                      | <i>p</i> -Hydroxycinnamic<br>acid isomer                                             |
| S48 | 5.33                          | C <sub>9</sub> H <sub>8</sub> O <sub>4</sub>    | 179.0345                         | 0.56          | 135.0453[M-H-CO <sub>2</sub> ] <sup>-</sup>                                                                                                                                                                                      | Caffeic acid                                                                         |
| S49 | 5.78                          | C <sub>9</sub> H <sub>8</sub> O <sub>3</sub>    | 163.0396                         | 0.61          | 119.0504[M-H-CO <sub>2</sub> ] <sup>-</sup>                                                                                                                                                                                      | <i>p</i> -Hydroxycinnamic<br>acid isomer                                             |
| S50 | 5.95                          | C <sub>9</sub> H <sub>8</sub> O <sub>4</sub>    | 179.0345                         | 0.56          | 135.0453[M-H-CO <sub>2</sub> ] <sup>-</sup>                                                                                                                                                                                      | Caffeic acid isomer                                                                  |
| S51 | 6.55                          | C <sub>9</sub> H <sub>8</sub> O <sub>3</sub>    | 163.0396                         | 0.61          | 119.0504[M-H-CO <sub>2</sub> ] <sup>-</sup>                                                                                                                                                                                      | <i>p</i> -Hydroxycinnamic<br>acid                                                    |
| S52 | 7.47                          | C <sub>22</sub> H <sub>22</sub> O <sub>12</sub> | 477.1036                         | 0.63          | 313.0566[M-H-C <sub>9</sub> H <sub>8</sub> O <sub>3</sub> ] <sup>-</sup> ,<br>169.0143[C <sub>7</sub> H <sub>6</sub> O <sub>5</sub> -H] <sup>-</sup> ,<br>163.0400[C <sub>9</sub> H <sub>8</sub> O <sub>3</sub> -H] <sup>-</sup> | 4-O-(6'-O-Galloyl-β<br>-D-glucopyranosyl)-<br>cis- <i>p</i> -coumaric acid<br>isomer |
| S53 | 7.51                          | C <sub>9</sub> H <sub>8</sub> O <sub>3</sub>    | 163.0396                         | 0.61          | 119.0502[M-H-CO <sub>2</sub> ] <sup>-</sup>                                                                                                                                                                                      | <i>p</i> -Hydroxycinnamic<br>acid isomer                                             |

|     |       |                                                 |          |      |                                                                                                                                                                                                                                                                                                                                    |                                                                                                                                               |
|-----|-------|-------------------------------------------------|----------|------|------------------------------------------------------------------------------------------------------------------------------------------------------------------------------------------------------------------------------------------------------------------------------------------------------------------------------------|-----------------------------------------------------------------------------------------------------------------------------------------------|
| S54 | 8.08  | C <sub>22</sub> H <sub>22</sub> O <sub>12</sub> | 477.1039 | 1.26 | 459.0923[M-H-H <sub>2</sub> O] <sup>-</sup> ,<br>433.1128[M-H-CO <sub>2</sub> ] <sup>-</sup> ,<br>313.0569[M-H-C <sub>9</sub> H <sub>8</sub> O <sub>3</sub> ] <sup>-</sup> ,<br>169.0143[C <sub>7</sub> H <sub>6</sub> O <sub>5</sub> -H] <sup>-</sup> ,<br>163.0403[C <sub>9</sub> H <sub>8</sub> O <sub>3</sub> -H] <sup>-</sup> | 4-O-(6'-O-Galloyl-β-D-glucopyranosyl)-cis-p-coumaric acid                                                                                     |
| S55 | 8.17  | C <sub>26</sub> H <sub>36</sub> O <sub>11</sub> | 523.2184 | 0.96 | 361.1655[M-H-Glc] <sup>-</sup> ,<br>346.1419[M-H-Glc-CH <sub>3</sub> ] <sup>-</sup> ,<br>315.1208[M-H-Glc-CH <sub>3</sub> -OCH <sub>3</sub> ] <sup>-</sup>                                                                                                                                                                         | (-)-Secoisolariciresinol-9'-O-β-D-glucopyranoside isomer                                                                                      |
| S56 | 8.41  | C <sub>26</sub> H <sub>34</sub> O <sub>11</sub> | 521.2028 | 0.96 | 359.1506[M-H-Glc] <sup>-</sup> ,<br>344.1269[M-H-Glc-CH <sub>3</sub> ] <sup>-</sup> ,<br>341.1383[M-H-Glc-H <sub>2</sub> O] <sup>-</sup> ,<br>311.0921[M-H-Glc-H <sub>2</sub> O-2CH <sub>3</sub> ] <sup>-</sup>                                                                                                                    | (7 <i>S</i> ,8 <i>R</i> )-Urolignoside/Glochidioboside/(7 <i>S</i> ,8 <i>R</i> )-Dihydrodehydrodiconiferyl alcohol<br>9-O-β-D-glucopyranoside |
| S57 | 8.66  | C <sub>26</sub> H <sub>34</sub> O <sub>11</sub> | 521.2028 | 0.96 | 359.1500[M-H-Glc] <sup>-</sup> ,<br>344.1250[M-H-Glc-CH <sub>3</sub> ] <sup>-</sup>                                                                                                                                                                                                                                                | (7 <i>S</i> ,8 <i>R</i> )-Urolignoside/Glochidioboside/(7 <i>S</i> ,8 <i>R</i> )-Dihydrodehydrodiconiferyl alcohol<br>9-O-β-D-glucopyranoside |
| S58 | 8.79  | C <sub>26</sub> H <sub>34</sub> O <sub>11</sub> | 521.2028 | 0.96 | 359.1509[M-H-Glc] <sup>-</sup> ,<br>344.1248[M-H-Glc-CH <sub>3</sub> ] <sup>-</sup> ,<br>326.1163[M-H-Glc-H <sub>2</sub> O-CH <sub>3</sub> ] <sup>-</sup> ,<br>311.0921[M-H-Glc-H <sub>2</sub> O-2CH <sub>3</sub> ] <sup>-</sup>                                                                                                   | (7 <i>S</i> ,8 <i>R</i> )-Urolignoside/Glochidioboside/(7 <i>S</i> ,8 <i>R</i> )-Dihydrodehydrodiconiferyl alcohol<br>9-O-β-D-glucopyranoside |
| S59 | 9.23  | C <sub>26</sub> H <sub>36</sub> O <sub>11</sub> | 523.2187 | 1.53 | 361.1674[M-H-Glc] <sup>-</sup> ,<br>346.1414[M-H-Glc-CH <sub>3</sub> ] <sup>-</sup>                                                                                                                                                                                                                                                | (-)-Secoisolariciresinol-9'-O-β-D-glucopyranoside isomer                                                                                      |
| S60 | 9.46  | C <sub>26</sub> H <sub>36</sub> O <sub>11</sub> | 523.2186 | 1.34 | 361.1659[M-H-Glc] <sup>-</sup> ,<br>346.1414[M-H-Glc-CH <sub>3</sub> ] <sup>-</sup> ,<br>315.1249[M-H-Glc-CH <sub>3</sub> -OCH <sub>3</sub> ] <sup>-</sup>                                                                                                                                                                         | (-)-Secoisolariciresinol-9'-O-β-D-glucopyranoside                                                                                             |
| S61 | 9.83  | C <sub>26</sub> H <sub>34</sub> O <sub>11</sub> | 521.2028 | 0.96 | 359.1518[M-H-Glc] <sup>-</sup> ,<br>344.1253[M-H-Glc-CH <sub>3</sub> ] <sup>-</sup>                                                                                                                                                                                                                                                | (-)-Isolariciresinol 3α-O-β-D-glucopyranoside/(-)-Lyoniresinol<br>3α-β-D-glucopyranoside                                                      |
| S62 | 9.91  | C <sub>22</sub> H <sub>26</sub> O <sub>8</sub>  | 417.1549 | 0.00 | 402.1302[M-H-CH <sub>3</sub> ] <sup>-</sup> ,<br>387.1093[M-H-OCH <sub>2</sub> ] <sup>-</sup>                                                                                                                                                                                                                                      | (-)-Episyringaresinol/Syringaresinol                                                                                                          |
| S63 | 10.07 | C <sub>26</sub> H <sub>34</sub> O <sub>11</sub> | 521.2028 | 0.96 | 341.1403[M-H-Glc-H <sub>2</sub> O] <sup>-</sup> ,                                                                                                                                                                                                                                                                                  | (-)-Isolariciresinol                                                                                                                          |

|                                                                    |                                           |
|--------------------------------------------------------------------|-------------------------------------------|
| 326.1163[M-H-Glc-H <sub>2</sub> O-CH <sub>3</sub> ] <sup>-</sup> , | 3α-O-β-D-glucopyranoside/(-)-Lyoniresinol |
| 311.0928[M-H-Glc-H <sub>2</sub> O-OCH <sub>2</sub> ] <sup>-</sup>  | 3α-β-D-glucopyranoside                    |

Table S6 Ionones from ZKYY

| No. | <i>t<sub>R</sub></i><br>(min) | Molecular<br>formula                            | Measured<br>value ( <i>m/z</i> ) | Diff<br>(ppm) | Product ions                                                                       | Compound name          |
|-----|-------------------------------|-------------------------------------------------|----------------------------------|---------------|------------------------------------------------------------------------------------|------------------------|
| D33 | 5.57                          | C <sub>21</sub> H <sub>34</sub> O <sub>10</sub> | 445.2076                         | 0.45          | 265.1467[M-H-H <sub>2</sub> O-Glc] <sup>-</sup>                                    | Frehmaglutoside F      |
| D34 | 6.69                          | C <sub>16</sub> H <sub>26</sub> O <sub>8</sub>  | 345.1553                         | 1.16          | 183.1028[M-H-Glc] <sup>-</sup>                                                     | Rehmapicroside         |
| D35 | 6.84                          | C <sub>21</sub> H <sub>34</sub> O <sub>10</sub> | 445.2076                         | 0.45          | 265.1461[M-H-H <sub>2</sub> O-Glc] <sup>-</sup> ,                                  | Frehmaglutoside E      |
|     |                               |                                                 |                                  |               | 235.1345[M-H-H <sub>2</sub> O-Glc-CH <sub>2</sub> O] <sup>-</sup> ,                |                        |
|     |                               |                                                 |                                  |               | 191.1447[M-H-H <sub>2</sub> O-Glc-CH <sub>2</sub> O-CO <sub>2</sub> ] <sup>-</sup> |                        |
| D36 | 7.22                          | C <sub>19</sub> H <sub>34</sub> O <sub>9</sub>  | 405.2128                         | 0.74          | 213.1499[M-H-Glc-2CH <sub>3</sub> ] <sup>-</sup> ,                                 | Oxyrehmanionoside B    |
|     |                               |                                                 |                                  |               | 195.1400[M-H-Glc-2CH <sub>3</sub> -H <sub>2</sub> O] <sup>-</sup>                  |                        |
| D37 | 8.04                          | C <sub>10</sub> H <sub>16</sub> O <sub>3</sub>  | 183.1023                         | 1.09          | 139.1129[M-H-CO <sub>2</sub> ] <sup>-</sup>                                        | Rehmapicrogenin        |
| D38 | 10.96                         | C <sub>21</sub> H <sub>34</sub> O <sub>9</sub>  | 429.2129                         | 0.93          | 267.1617[M-H-Glc] <sup>-</sup> ,                                                   | Frehmaglutin B         |
|     |                               |                                                 |                                  |               | 249.1500[M-H-Glc-H <sub>2</sub> O] <sup>-</sup> ,                                  |                        |
|     |                               |                                                 |                                  |               | 231.1394[M-H-Glc-2H <sub>2</sub> O] <sup>-</sup> ,                                 |                        |
|     |                               |                                                 |                                  |               | 223.1719[M-H-Glc-CO <sub>2</sub> ] <sup>-</sup> ,                                  |                        |
|     |                               |                                                 |                                  |               | 205.1616[M-H-Glc-H <sub>2</sub> O-CO <sub>2</sub> ] <sup>-</sup>                   |                        |
| D39 | 12.12                         | C <sub>10</sub> H <sub>16</sub> O <sub>3</sub>  | 183.1024                         | 1.64          | 139.1128[M-H-CO <sub>2</sub> ] <sup>-</sup>                                        | Rehmapicrogenin isomer |
| D40 | 14.89                         | C <sub>28</sub> H <sub>40</sub> O <sub>10</sub> | 535.2544                         | 0.19          | 417.1024[M-H-C <sub>8</sub> H <sub>6</sub> O] <sup>-</sup> ,                       | Frehmaglutoside C      |
|     |                               |                                                 |                                  |               | 163.0404[C <sub>8</sub> H <sub>6</sub> O <sub>3</sub> -H] <sup>-</sup>             |                        |
| D41 | 17.81                         | C <sub>12</sub> H <sub>20</sub> O <sub>3</sub>  | 211.1339                         | 2.37          | 183.1396[M-H-CO] <sup>-</sup> ,                                                    | Frehmaglutoside A      |
|     |                               |                                                 |                                  |               | 168.0661[M-H-CO-CH <sub>3</sub> ] <sup>-</sup> ,                                   |                        |
|     |                               |                                                 |                                  |               | 167.1443[M-H-CO <sub>2</sub> ] <sup>-</sup>                                        |                        |

Table S7 Triterpenoids from ZKYY

| No.                                         | <i>t<sub>R</sub></i><br>(min) | Molecular<br>formula                           | Measured<br>value ( <i>m/z</i> ) | Diff<br>(ppm) | Product ions                                   | Compound name               |
|---------------------------------------------|-------------------------------|------------------------------------------------|----------------------------------|---------------|------------------------------------------------|-----------------------------|
| Triterpenoids from <i>Astragali Radix</i>   |                               |                                                |                                  |               |                                                |                             |
| H92                                         | 29.09                         | C <sub>30</sub> H <sub>48</sub> O <sub>3</sub> | 455.3529                         | 0.88          | 437.3365[M-H-H <sub>2</sub> O] <sup>-</sup> ,  | Betulinic acid              |
|                                             |                               |                                                |                                  |               | 409.3488[M-H-H <sub>2</sub> O-CO] <sup>-</sup> |                             |
| H93                                         | 29.87                         | C <sub>30</sub> H <sub>48</sub> O <sub>3</sub> | 455.3531                         | 1.32          | 409.3483[M-H-H <sub>2</sub> O-CO] <sup>-</sup> | Oleanolic acid <sup>a</sup> |
| H94                                         | 29.95                         | C <sub>30</sub> H <sub>48</sub> O <sub>3</sub> | 455.3528                         | 0.66          | 409.3474[M-H-H <sub>2</sub> O-CO] <sup>-</sup> | Ursolic acid <sup>a</sup>   |
| Triterpenoids from <i>Corni officinalis</i> |                               |                                                |                                  |               |                                                |                             |

|                                                      |       |                                                 |          |       |                                                                                                                                                                                                                                                                                                                                                                                                                                                                                                                                                                                                                                                                                             |                                                                                           |
|------------------------------------------------------|-------|-------------------------------------------------|----------|-------|---------------------------------------------------------------------------------------------------------------------------------------------------------------------------------------------------------------------------------------------------------------------------------------------------------------------------------------------------------------------------------------------------------------------------------------------------------------------------------------------------------------------------------------------------------------------------------------------------------------------------------------------------------------------------------------------|-------------------------------------------------------------------------------------------|
| S88                                                  | 16.17 | C <sub>36</sub> H <sub>58</sub> O <sub>10</sub> | 649.3941 | -1.69 | 487.3427[M-H-Glc] <sup>-</sup>                                                                                                                                                                                                                                                                                                                                                                                                                                                                                                                                                                                                                                                              | Arjunglucoside<br>II isomer                                                               |
| S89                                                  | 16.86 | C <sub>36</sub> H <sub>58</sub> O <sub>10</sub> | 649.3954 | 0.31  | 487.3418[M-H-Glc] <sup>-</sup>                                                                                                                                                                                                                                                                                                                                                                                                                                                                                                                                                                                                                                                              | Arjunglucoside<br>II                                                                      |
| <b>Triterpenoids from <i>Trichosanthis Radix</i></b> |       |                                                 |          |       |                                                                                                                                                                                                                                                                                                                                                                                                                                                                                                                                                                                                                                                                                             |                                                                                           |
| T1                                                   | 12.22 | C <sub>30</sub> H <sub>48</sub> O <sub>7</sub>  | 519.3325 | 0.58  | 501.3213[M-H-H <sub>2</sub> O] <sup>-</sup> ,<br>459.3167[M-H-C <sub>3</sub> H <sub>8</sub> O] <sup>-</sup> ,<br>387.2559[M-H-C <sub>3</sub> H <sub>8</sub> O-4H <sub>2</sub> O] <sup>-</sup>                                                                                                                                                                                                                                                                                                                                                                                                                                                                                               | Cucurbitacin P<br>isomer                                                                  |
| T2                                                   | 13.46 | C <sub>30</sub> H <sub>46</sub> O <sub>7</sub>  | 517.3171 | 1.16  | 499.3054[M-H-H <sub>2</sub> O] <sup>-</sup> ,<br>457.2955[M-H-C <sub>3</sub> H <sub>8</sub> O] <sup>-</sup> ,<br>439.2862[M-H-C <sub>3</sub> H <sub>8</sub> O-H <sub>2</sub> O] <sup>-</sup> ,<br>385.2399[M-H-H <sub>2</sub> O-C <sub>2</sub> H <sub>4</sub> O-C <sub>4</sub> H <sub>6</sub> O] <sup>-</sup>                                                                                                                                                                                                                                                                                                                                                                               | Cucurbitacin R<br>isomer/Dihydroc<br>ucurbitacin D<br>isomer<br>/Cucurbitacin O<br>isomer |
| T3                                                   | 14.30 | C <sub>30</sub> H <sub>48</sub> O <sub>7</sub>  | 519.3325 | 0.58  | 501.3223[M-H-H <sub>2</sub> O] <sup>-</sup> ,<br>459.3122[M-H-C <sub>3</sub> H <sub>8</sub> O] <sup>-</sup> ,<br>441.3003[M-H-C <sub>3</sub> H <sub>8</sub> O-H <sub>2</sub> O] <sup>-</sup> ,<br>423.2924[M-H-C <sub>3</sub> H <sub>8</sub> O-2H <sub>2</sub> O] <sup>-</sup> ,<br>387.2543[M-H-C <sub>3</sub> H <sub>8</sub> O-4H <sub>2</sub> O] <sup>-</sup> ,<br>359.2242[M-H-C <sub>3</sub> H <sub>8</sub> O-4H <sub>2</sub> O-CO] <sup>-</sup>                                                                                                                                                                                                                                       | Cucurbitacin P                                                                            |
| T4                                                   | 14.72 | C <sub>30</sub> H <sub>44</sub> O <sub>7</sub>  | 515.3013 | 0.78  | 479.2794[M-H-2H <sub>2</sub> O] <sup>-</sup> ,<br>437.2691[M-H-H <sub>2</sub> O-C <sub>3</sub> H <sub>8</sub> O] <sup>-</sup> ,<br>385.2089[M-H-H <sub>2</sub> O-C <sub>4</sub> H <sub>6</sub> O-C <sub>2</sub> H <sub>2</sub> O] <sup>-</sup> ,<br>341.2123[M-H-H <sub>2</sub> O-C <sub>4</sub> H <sub>6</sub> O-C <sub>2</sub> H <sub>2</sub> O-C <sub>2</sub> H <sub>4</sub> O] <sup>-</sup>                                                                                                                                                                                                                                                                                             | Cucurbitacin D                                                                            |
| T5                                                   | 14.72 | C <sub>30</sub> H <sub>46</sub> O <sub>8</sub>  | 533.3116 | 0.38  | 497.2876[M-H-2H <sub>2</sub> O] <sup>-</sup> ,<br>479.2806[M-H-3H <sub>2</sub> O] <sup>-</sup> ,<br>464.2560[M-H-3H <sub>2</sub> O-CH <sub>3</sub> ] <sup>-</sup> ,<br>437.2689[M-H-2H <sub>2</sub> O-C <sub>3</sub> H <sub>8</sub> O] <sup>-</sup> ,<br>427.2495[M-H-2H <sub>2</sub> O-C <sub>4</sub> H <sub>6</sub> O] <sup>-</sup> ,<br>409.2382[M-H-3H <sub>2</sub> O-C <sub>4</sub> H <sub>6</sub> O] <sup>-</sup> ,<br>385.2419[M-H-2H <sub>2</sub> O-C <sub>4</sub> H <sub>6</sub> O-C <sub>2</sub> H <sub>2</sub> O] <sup>-</sup> ,<br>341.2124[M-H-2H <sub>2</sub> O-C <sub>4</sub> H <sub>6</sub> O-C <sub>2</sub> H <sub>2</sub> O-C <sub>2</sub> H <sub>4</sub> O] <sup>-</sup> | Cucurbitacin H                                                                            |
| T6                                                   | 14.96 | C <sub>30</sub> H <sub>46</sub> O <sub>8</sub>  | 533.3118 | 0.75  | 479.2751[M-H-3H <sub>2</sub> O] <sup>-</sup> ,<br>427.2480[M-H-2H <sub>2</sub> O-C <sub>4</sub> H <sub>6</sub> O] <sup>-</sup> ,<br>385.2428[M-H-2H <sub>2</sub> O-C <sub>4</sub> H <sub>6</sub> O-C <sub>2</sub> H <sub>2</sub> O] <sup>-</sup> ,<br>341.2119[M-H-2H <sub>2</sub> O-C <sub>4</sub> H <sub>6</sub> O-C <sub>2</sub> H <sub>2</sub> O-C <sub>2</sub> H <sub>4</sub> O] <sup>-</sup>                                                                                                                                                                                                                                                                                          | Cucurbitacin H<br>isomer                                                                  |
| T7                                                   | 16.70 | C <sub>30</sub> H <sub>46</sub> O <sub>7</sub>  | 517.3171 | 1.16  | 499.3082[M-H-H <sub>2</sub> O] <sup>-</sup> ,<br>457.2949[M-H-C <sub>3</sub> H <sub>8</sub> O] <sup>-</sup> ,<br>455.2816[M-H-H <sub>2</sub> O-C <sub>2</sub> H <sub>4</sub> O] <sup>-</sup> ,<br>439.2861[M-H-C <sub>3</sub> H <sub>8</sub> O-H <sub>2</sub> O] <sup>-</sup>                                                                                                                                                                                                                                                                                                                                                                                                               | Cucurbitacin R/<br>dihydrocucurbita<br>cin D/<br>cucurbitacin O                           |



|     |       |                                                |          |       |                                                                                                                                                                                                                                                                                                                                                                                                                                 |                                                                 |
|-----|-------|------------------------------------------------|----------|-------|---------------------------------------------------------------------------------------------------------------------------------------------------------------------------------------------------------------------------------------------------------------------------------------------------------------------------------------------------------------------------------------------------------------------------------|-----------------------------------------------------------------|
| T8  | 16.70 | C <sub>30</sub> H <sub>44</sub> O <sub>7</sub> | 515.3007 | -0.39 | 385.2377[M-H-H <sub>2</sub> O-C <sub>2</sub> H <sub>4</sub> O-C <sub>4</sub> H <sub>6</sub> O] <sup>-</sup> ,<br>367.2302[M-H-2H <sub>2</sub> O-C <sub>2</sub> H <sub>4</sub> O-C <sub>4</sub> H <sub>6</sub> O] <sup>-</sup> ,<br>479.2771[M-H-2H <sub>2</sub> O] <sup>-</sup> ,<br>461.2759[M-H-3H <sub>2</sub> O] <sup>-</sup> ,<br>437.2693[M-H-2H <sub>2</sub> O-C <sub>2</sub> H <sub>2</sub> O] <sup>-</sup>             | Cucurbitacin D<br>isomer                                        |
| T9  | 16.94 | C <sub>30</sub> H <sub>46</sub> O <sub>7</sub> | 517.3170 | 0.97  | 499.3068[M-H-H <sub>2</sub> O] <sup>-</sup> ,<br>457.2982[M-H-C <sub>3</sub> H <sub>8</sub> O] <sup>-</sup> ,<br>439.2863[M-H-C <sub>3</sub> H <sub>8</sub> O-H <sub>2</sub> O] <sup>-</sup> ,<br>385.2389[M-H-H <sub>2</sub> O-C <sub>2</sub> H <sub>4</sub> O-C <sub>4</sub> H <sub>6</sub> O] <sup>-</sup> ,<br>367.2295[M-H-2H <sub>2</sub> O-C <sub>2</sub> H <sub>4</sub> O-C <sub>4</sub> H <sub>6</sub> O] <sup>-</sup> | Cucurbitacin R/<br>dihydrocucurbita<br>cin D/<br>cucurbitacin O |
| T10 | 17.62 | C <sub>30</sub> H <sub>46</sub> O <sub>7</sub> | 517.3166 | 0.19  | 385.2389[M-H-H <sub>2</sub> O-C <sub>2</sub> H <sub>4</sub> O-C <sub>4</sub> H <sub>6</sub> O] <sup>-</sup> ,<br>367.2278[M-H-2H <sub>2</sub> O-C <sub>2</sub> H <sub>4</sub> O-C <sub>4</sub> H <sub>6</sub> O] <sup>-</sup>                                                                                                                                                                                                   | Cucurbitacin R/<br>dihydrocucurbita<br>cin D/<br>cucurbitacin O |
| T11 | 18.61 | C <sub>30</sub> H <sub>44</sub> O <sub>7</sub> | 515.3014 | 0.97  | 437.2743[M-H-2H <sub>2</sub> O-C <sub>2</sub> H <sub>2</sub> O] <sup>-</sup>                                                                                                                                                                                                                                                                                                                                                    | Cucurbitacin D<br>isomer                                        |

a: Compound identified by comparison with the standard reference.

Table S8 Other compounds from ZKYY

| No.                                         | t <sub>R</sub><br>(min) | Molecular<br>formula                            | Measured<br>value ( <i>m/z</i> ) | Diff<br>(ppm) | Product ions                                                                                                                                                                                                                      | Compound name                               |
|---------------------------------------------|-------------------------|-------------------------------------------------|----------------------------------|---------------|-----------------------------------------------------------------------------------------------------------------------------------------------------------------------------------------------------------------------------------|---------------------------------------------|
| Organic acids from <i>Corni officinalis</i> |                         |                                                 |                                  |               |                                                                                                                                                                                                                                   |                                             |
| S90                                         | 0.96                    | C <sub>6</sub> H <sub>8</sub> O <sub>7</sub>    | 191.0196                         | 2.09          | 173.0460[M-H-H <sub>2</sub> O] <sup>-</sup> ,<br>111.0090[M-H-CO <sub>2</sub> -2H <sub>2</sub> O] <sup>-</sup>                                                                                                                    | Citric acid<br>isomer                       |
| S91                                         | 1.10                    | C <sub>7</sub> H <sub>6</sub> O <sub>5</sub>    | 169.0141                         | 2.37          | 125.0246[M-H-CO <sub>2</sub> ] <sup>-</sup>                                                                                                                                                                                       | Gallic acid<br>isomer                       |
| S92                                         | 1.21                    | C <sub>6</sub> H <sub>8</sub> O <sub>7</sub>    | 191.0196                         | 2.09          | 173.0460[M-H-H <sub>2</sub> O] <sup>-</sup> ,<br>147.0305[M-H-CO <sub>2</sub> ] <sup>-</sup> ,<br>129.0197[M-H-CO <sub>2</sub> -H <sub>2</sub> O] <sup>-</sup> ,<br>111.0091[M-H-CO <sub>2</sub> -2H <sub>2</sub> O] <sup>-</sup> | Citric acid                                 |
| S93                                         | 1.50                    | C <sub>13</sub> H <sub>16</sub> O <sub>10</sub> | 331.0667                         | 0.60          | 169.0145[M-H-Glc] <sup>-</sup> ,<br>125.0250[M-H-Glc-CO <sub>2</sub> ] <sup>-</sup>                                                                                                                                               | Gallic acid<br>4-O-β-D-glucosi<br>de        |
| S94                                         | 1.68                    | C <sub>13</sub> H <sub>16</sub> O <sub>10</sub> | 331.0668                         | 0.91          | 169.0145[M-H-Glc] <sup>-</sup> ,<br>125.0247[M-H-Glc-CO <sub>2</sub> ] <sup>-</sup>                                                                                                                                               | Gallic acid<br>4-O-β-D-glucosi<br>de isomer |
| S95                                         | 1.84                    | C <sub>7</sub> H <sub>6</sub> O <sub>5</sub>    | 169.0141                         | 2.37          | 125.0246[M-H-CO <sub>2</sub> ] <sup>-</sup>                                                                                                                                                                                       | Gallic acid                                 |
| S96                                         | 2.50                    | C <sub>7</sub> H <sub>6</sub> O <sub>4</sub>    | 153.0189                         | 0.65          | 109.0298[M-H-CO <sub>2</sub> ] <sup>-</sup>                                                                                                                                                                                       | 3,5-Dihydroxybe<br>nzoic acid isomer        |
| S97                                         | 3.16                    | C <sub>13</sub> H <sub>16</sub> O <sub>10</sub> | 331.0668                         | 0.91          | 169.0145[M-H-Glc] <sup>-</sup> ,<br>125.0246[M-H-Glc-CO <sub>2</sub> ] <sup>-</sup>                                                                                                                                               | Gallic acid<br>4-O-β-D-glucosi              |

|      |      |                                                 |           |      |                                                                                                                                                                                                                                                                                                                                                                                                                                                                                                                                                                                     |                                         |
|------|------|-------------------------------------------------|-----------|------|-------------------------------------------------------------------------------------------------------------------------------------------------------------------------------------------------------------------------------------------------------------------------------------------------------------------------------------------------------------------------------------------------------------------------------------------------------------------------------------------------------------------------------------------------------------------------------------|-----------------------------------------|
| S98  | 3.16 | C <sub>7</sub> H <sub>6</sub> O <sub>5</sub>    | 169.0141  | 2.37 | 125.0244[M-H-CO <sub>2</sub> ] <sup>-</sup>                                                                                                                                                                                                                                                                                                                                                                                                                                                                                                                                         | de isomer<br>Gallic acid<br>isomer      |
| S99  | 3.51 | C <sub>7</sub> H <sub>6</sub> O <sub>4</sub>    | 153.0189  | 0.65 | 109.0296[M-H-CO <sub>2</sub> ] <sup>-</sup>                                                                                                                                                                                                                                                                                                                                                                                                                                                                                                                                         | 3,5-Dihydroxybenzoic acid               |
| S100 | 3.90 | C <sub>13</sub> H <sub>16</sub> O <sub>10</sub> | 331.0671  | 1.81 | 169.0145[M-H-Glc] <sup>-</sup> ,<br>125.0250[M-H-Glc-CO <sub>2</sub> ] <sup>-</sup>                                                                                                                                                                                                                                                                                                                                                                                                                                                                                                 | Gallic acid<br>4-O-β-D-glucoside isomer |
| S101 | 4.28 | C <sub>8</sub> H <sub>8</sub> O <sub>5</sub>    | 183.0297  | 2.19 | 168.0065[M-H-CH <sub>3</sub> ] <sup>-</sup> ,<br>139.0404[M-H-CO <sub>2</sub> ] <sup>-</sup>                                                                                                                                                                                                                                                                                                                                                                                                                                                                                        | Methyl gallate<br>isomer                |
| S102 | 4.84 | C <sub>8</sub> H <sub>8</sub> O <sub>3</sub>    | 151.03971 | 1.32 | 123.0453[M-H-CO] <sup>-</sup> ,<br>108.0456[M-H-CO-CH <sub>3</sub> ] <sup>-</sup>                                                                                                                                                                                                                                                                                                                                                                                                                                                                                                   | Vanillin isomer                         |
| S103 | 5.02 | C <sub>7</sub> H <sub>6</sub> O <sub>4</sub>    | 153.0190  | 1.31 | 109.0297[M-H-CO <sub>2</sub> ] <sup>-</sup>                                                                                                                                                                                                                                                                                                                                                                                                                                                                                                                                         | 3,5-Dihydroxybenzoic acid isomer        |
| S104 | 5.37 | C <sub>8</sub> H <sub>8</sub> O <sub>5</sub>    | 183.0297  | 2.19 | 168.0065[M-H-CH <sub>3</sub> ] <sup>-</sup> ,<br>139.0401[M-H-CO <sub>2</sub> ] <sup>-</sup>                                                                                                                                                                                                                                                                                                                                                                                                                                                                                        | Methyl gallate<br>isomer                |
| S105 | 5.47 | C <sub>16</sub> H <sub>18</sub> O <sub>9</sub>  | 353.0875  | 0.57 | 191.0565[M-H-C <sub>9</sub> H <sub>6</sub> O <sub>3</sub> ] <sup>-</sup> ,<br>173.0456[M-H-C <sub>9</sub> H <sub>6</sub> O <sub>3</sub> -H <sub>2</sub> O] <sup>-</sup> ,<br>161.0249[C <sub>9</sub> H <sub>6</sub> O <sub>3</sub> -H] <sup>-</sup> ,<br>147.0303[M-H-C <sub>9</sub> H <sub>6</sub> O <sub>3</sub> -CO <sub>2</sub> ] <sup>-</sup> ,<br>129.0195[M-H-C <sub>9</sub> H <sub>6</sub> O <sub>3</sub> -CO <sub>2</sub> -H <sub>2</sub> O] <sup>-</sup> ,<br>111.0095[M-H-C <sub>9</sub> H <sub>6</sub> O <sub>3</sub> -CO <sub>2</sub> -2H <sub>2</sub> O] <sup>-</sup> | Chlorogenic acid<br>isomer              |
| S106 | 5.82 | C <sub>16</sub> H <sub>18</sub> O <sub>9</sub>  | 353.0875  | 0.57 | 191.0562[M-H-C <sub>9</sub> H <sub>6</sub> O <sub>3</sub> ] <sup>-</sup> ,<br>173.0458[M-H-C <sub>9</sub> H <sub>6</sub> O <sub>3</sub> -H <sub>2</sub> O] <sup>-</sup> ,<br>161.0245[C <sub>9</sub> H <sub>6</sub> O <sub>3</sub> -H] <sup>-</sup> ,<br>129.0191[M-H-C <sub>9</sub> H <sub>6</sub> O <sub>3</sub> -CO <sub>2</sub> -H <sub>2</sub> O] <sup>-</sup> ,<br>111.0088[M-H-C <sub>9</sub> H <sub>6</sub> O <sub>3</sub> -CO <sub>2</sub> -2H <sub>2</sub> O] <sup>-</sup>                                                                                                | Chlorogenic acid                        |
| S107 | 5.84 | C <sub>8</sub> H <sub>8</sub> O <sub>3</sub>    | 151.0397  | 1.32 | 123.0452[M-H-CO] <sup>-</sup> ,<br>108.0454[M-H-CO-CH <sub>3</sub> ] <sup>-</sup>                                                                                                                                                                                                                                                                                                                                                                                                                                                                                                   | Vanillin                                |
| S108 | 6.13 | C <sub>7</sub> H <sub>6</sub> O <sub>4</sub>    | 153.0191  | 1.96 | 109.0296[M-H-CO <sub>2</sub> ] <sup>-</sup>                                                                                                                                                                                                                                                                                                                                                                                                                                                                                                                                         | 3,5-Dihydroxybenzoic acid isomer        |
| S109 | 6.63 | C <sub>16</sub> H <sub>18</sub> O <sub>9</sub>  | 353.0877  | 1.13 | 111.0090[M-H-C <sub>9</sub> H <sub>6</sub> O <sub>3</sub> -CO <sub>2</sub> -2H <sub>2</sub> O] <sup>-</sup>                                                                                                                                                                                                                                                                                                                                                                                                                                                                         | Chlorogenic acid<br>isomer              |
| S110 | 7.04 | C <sub>16</sub> H <sub>18</sub> O <sub>9</sub>  | 353.0874  | 0.28 | 191.0555[M-H-C <sub>9</sub> H <sub>6</sub> O <sub>3</sub> ] <sup>-</sup> ,<br>161.0242[C <sub>9</sub> H <sub>6</sub> O <sub>3</sub> -H] <sup>-</sup> ,<br>147.0452[M-H-C <sub>9</sub> H <sub>6</sub> O <sub>3</sub> -CO <sub>2</sub> ] <sup>-</sup> ,<br>129.0195[M-H-C <sub>9</sub> H <sub>6</sub> O <sub>3</sub> -CO <sub>2</sub> -H <sub>2</sub> O] <sup>-</sup> ,<br>111.0089[M-H-C <sub>9</sub> H <sub>6</sub> O <sub>3</sub> -CO <sub>2</sub> -2H <sub>2</sub> O] <sup>-</sup>                                                                                                | Chlorogenic acid<br>isomer              |
| S111 | 7.83 | C <sub>16</sub> H <sub>18</sub> O <sub>9</sub>  | 353.0879  | 1.70 | 191.0560[M-H-C <sub>9</sub> H <sub>6</sub> O <sub>3</sub> ] <sup>-</sup> ,<br>111.0093[M-H-C <sub>9</sub> H <sub>6</sub> O <sub>3</sub> -CO <sub>2</sub> -2H <sub>2</sub> O] <sup>-</sup>                                                                                                                                                                                                                                                                                                                                                                                           | Chlorogenic acid<br>isomer              |
| S112 | 8.59 | C <sub>16</sub> H <sub>18</sub> O <sub>9</sub>  | 353.0876  | 0.85 | 111.0088[M-H-C <sub>9</sub> H <sub>6</sub> O <sub>3</sub> -CO <sub>2</sub> -2H <sub>2</sub> O] <sup>-</sup>                                                                                                                                                                                                                                                                                                                                                                                                                                                                         | Chlorogenic acid<br>isomer              |
| S113 | 9.14 | C <sub>8</sub> H <sub>8</sub> O <sub>5</sub>    | 183.0297  | 2.19 | 168.0066[M-H-CH <sub>3</sub> ] <sup>-</sup> ,<br>139.0399[M-H-CO <sub>2</sub> ] <sup>-</sup>                                                                                                                                                                                                                                                                                                                                                                                                                                                                                        | Methyl gallate                          |

| Polyphenols from <i>Chinese yam</i> |       |                                                |          |      |                                                                                                                                                                                                                                                                                                                                                                                                           |                                                                   |
|-------------------------------------|-------|------------------------------------------------|----------|------|-----------------------------------------------------------------------------------------------------------------------------------------------------------------------------------------------------------------------------------------------------------------------------------------------------------------------------------------------------------------------------------------------------------|-------------------------------------------------------------------|
| SY1                                 | 11.64 | C <sub>14</sub> H <sub>14</sub> O <sub>3</sub> | 229.0870 | 2.18 | 123.0459[M-H-C <sub>7</sub> H <sub>6</sub> O] <sup>-</sup>                                                                                                                                                                                                                                                                                                                                                | 2', 3, 5-Trihydroxybibenzyl isomer                                |
| SY2                                 | 12.22 | C <sub>19</sub> H <sub>24</sub> O <sub>4</sub> | 315.1600 | 1.27 | 297.1503[M-H-H <sub>2</sub> O] <sup>-</sup> ,<br>279.1394[M-H-2H <sub>2</sub> O] <sup>-</sup> ,<br>191.1079[M-H-H <sub>2</sub> O-C <sub>7</sub> H <sub>6</sub> O] <sup>-</sup> ,<br>173.0979[M-H-2H <sub>2</sub> O-C <sub>7</sub> H <sub>6</sub> O] <sup>-</sup> ,<br>149.0610[M-H-C <sub>9</sub> H <sub>9</sub> O <sub>2</sub> ] <sup>-</sup>                                                            | (3R,5R)-3,5-Dihydroxy-1,7-bis(4-hydroxyphenyl)-3,5-heptanediol    |
| SY3                                 | 12.40 | C <sub>14</sub> H <sub>14</sub> O <sub>3</sub> | 229.0870 | 2.18 | 123.0453[M-H-C <sub>7</sub> H <sub>6</sub> O] <sup>-</sup>                                                                                                                                                                                                                                                                                                                                                | 2',3,5-Trihydroxybibenzyl isomer                                  |
| SY4                                 | 13.15 | C <sub>21</sub> H <sub>28</sub> O <sub>6</sub> | 375.1811 | 0.80 | 360.1581[M-H-CH <sub>3</sub> ] <sup>-</sup> ,<br>203.0865[M-H-2H <sub>2</sub> O-C <sub>8</sub> H <sub>8</sub> O <sub>2</sub> ] <sup>-</sup> ,<br>179.0715[M-H-C <sub>10</sub> H <sub>11</sub> O <sub>3</sub> ] <sup>-</sup> ,<br>149.0608[M-H-C <sub>10</sub> H <sub>11</sub> O <sub>3</sub> -OCH <sub>2</sub> ] <sup>-</sup> ,<br>135.0452[C <sub>8</sub> H <sub>8</sub> O <sub>2</sub> -H] <sup>-</sup> | (3R,5R)-1,7-Bis(4-hydroxy-3-methoxyphenyl)-3,5-heptanediol        |
| SY5                                 | 13.39 | C <sub>21</sub> H <sub>28</sub> O <sub>6</sub> | 375.1811 | 0.80 | 360.1573[M-H-CH <sub>3</sub> ] <sup>-</sup> ,<br>203.0860[M-H-2H <sub>2</sub> O-C <sub>8</sub> H <sub>8</sub> O <sub>2</sub> ] <sup>-</sup> ,<br>179.0723[M-H-C <sub>10</sub> H <sub>11</sub> O <sub>3</sub> ] <sup>-</sup> ,<br>149.0616[M-H-C <sub>10</sub> H <sub>11</sub> O <sub>3</sub> -OCH <sub>2</sub> ] <sup>-</sup> ,<br>135.0453[C <sub>8</sub> H <sub>8</sub> O <sub>2</sub> -H] <sup>-</sup> | (3R,5R)-1,7-Bis(4-hydroxy-3-methoxyphenyl)-3,5-heptanediol isomer |
| SY6                                 | 13.47 | C <sub>14</sub> H <sub>14</sub> O <sub>3</sub> | 229.0870 | 2.18 | 123.0453[M-H-C <sub>7</sub> H <sub>6</sub> O] <sup>-</sup>                                                                                                                                                                                                                                                                                                                                                | 2',3,5-Trihydroxybibenzyl                                         |
| SY7                                 | 18.97 | C <sub>15</sub> H <sub>16</sub> O <sub>3</sub> | 243.1026 | 2.06 | 137.0609[M-H-C <sub>7</sub> H <sub>6</sub> O] <sup>-</sup> ,<br>122.0374[M-H-C <sub>7</sub> H <sub>6</sub> O-CH <sub>3</sub> ] <sup>-</sup> ,<br>106.0425[M-H-C <sub>7</sub> H <sub>6</sub> O-OCH <sub>3</sub> ] <sup>-</sup>                                                                                                                                                                             | Batatasin <b>III</b> /Batatasin <b>IV</b>                         |

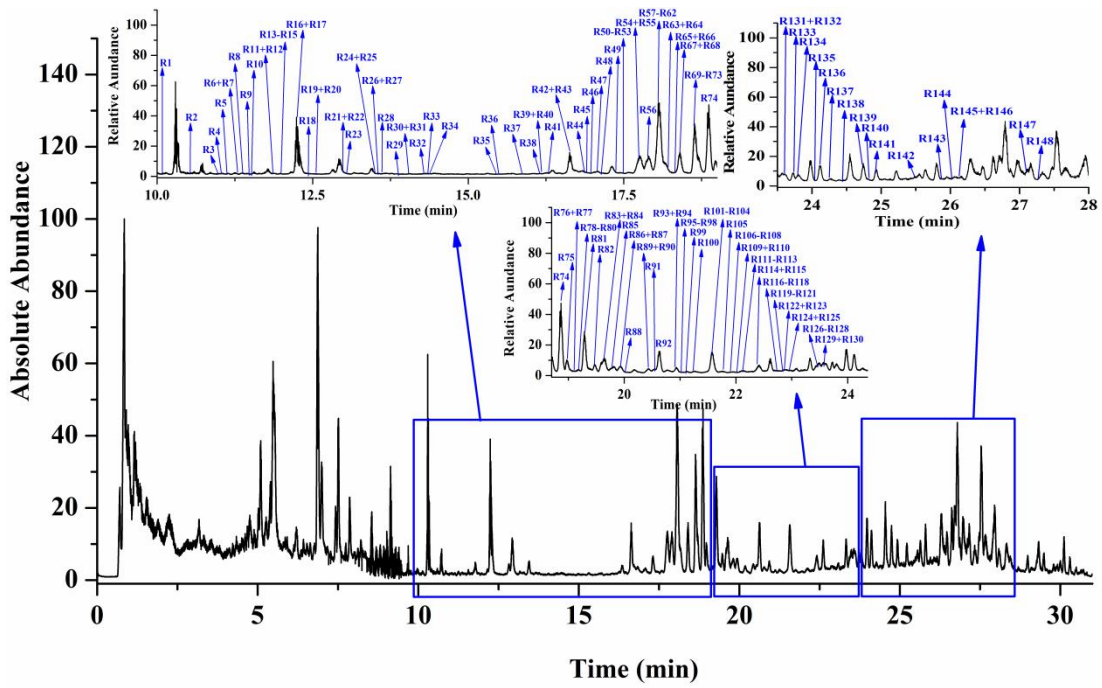

Fig. S3 The LC-MS traces of ginsenosides (saponins) on TIC of ZKYY extract.

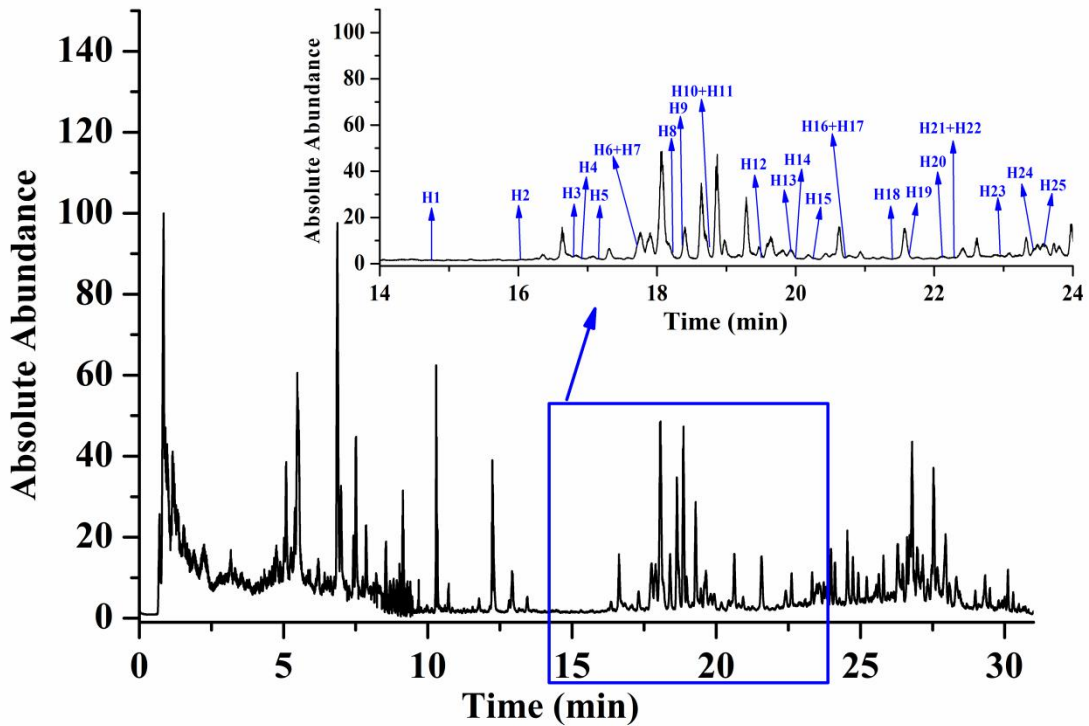

Fig. S4 The LC-MS traces of astragalus saponins on TIC of ZKYY extract.

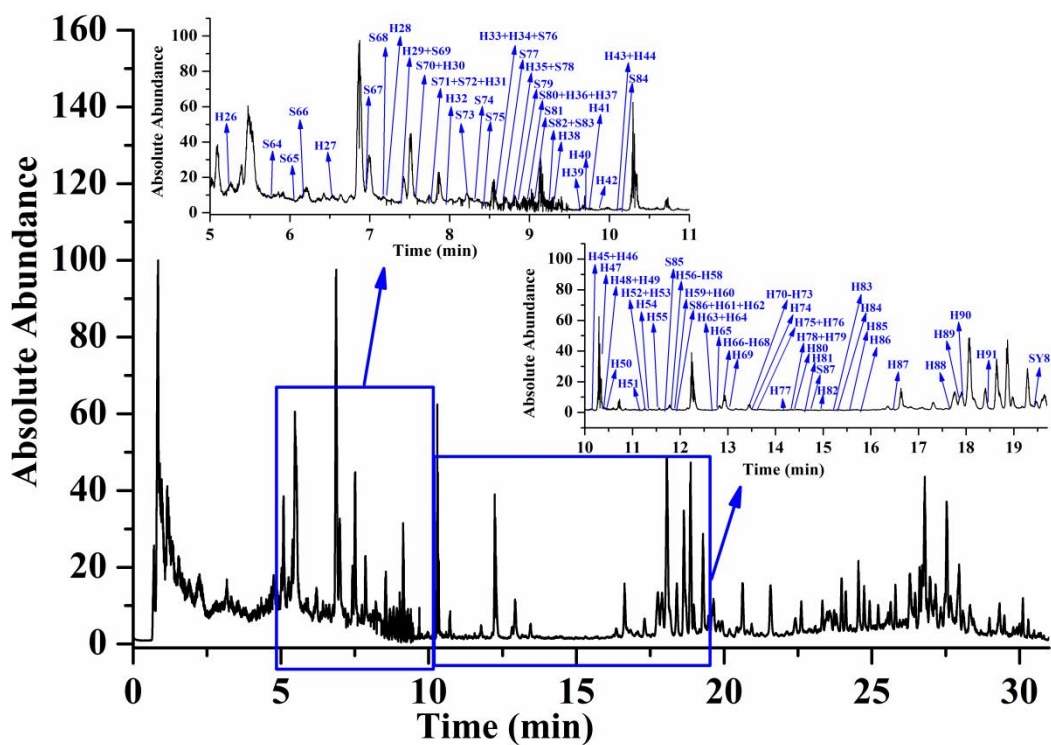

Fig. S5 The LC-MS traces of flavonoids on TIC of ZKYY extract.

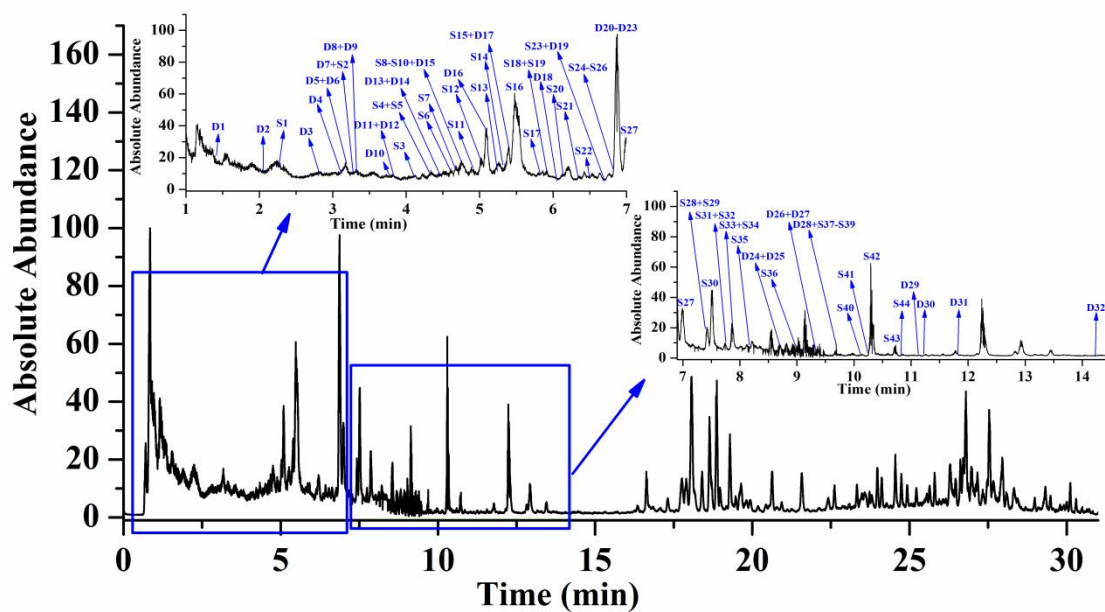

Fig. S6 The LC-MS traces of iridoids on TIC of ZKYY extract.

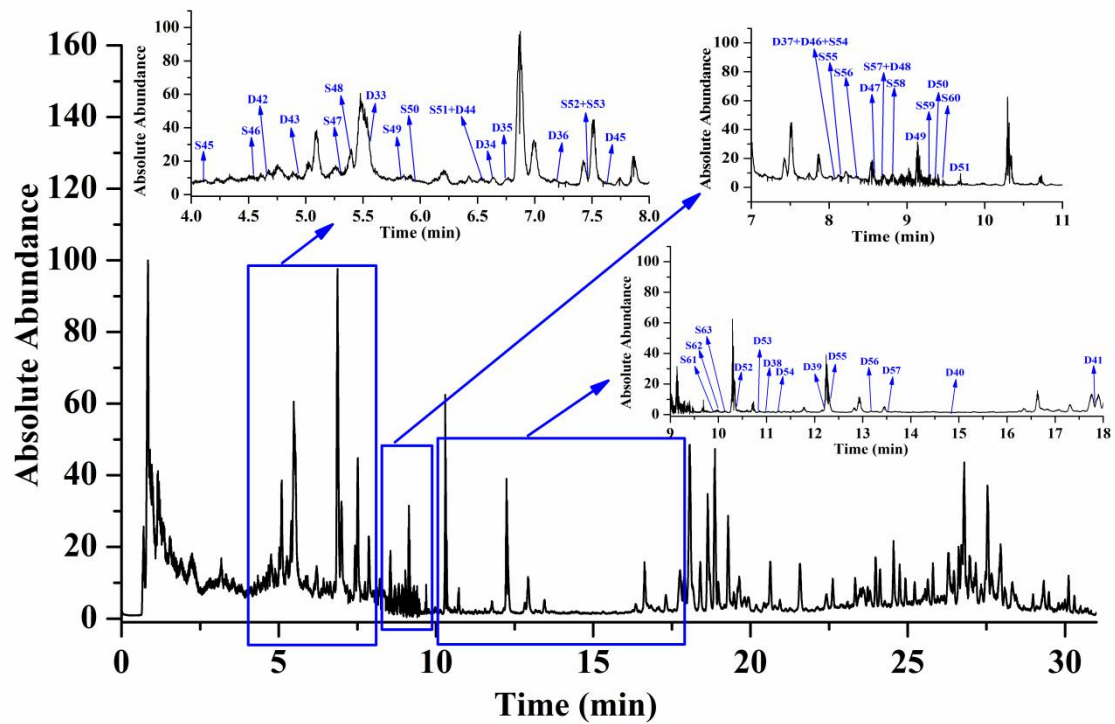

Fig. S7 The LC-MS traces of phenylethanoid glycosides, phenylpropanoids and ionones on TIC of ZKYY extract.
